# Supplementary material for: New Pyrroline Isolated from Antarctic Krill-Derived Actinomycetes Nocardiopsis sp. LX-1 Combining with Molecular Networking
Source: MDPI journal article supplement (doi:10.3390/md21020127), 2023-02-15
Supplement: s1 [file s1]

# Supplementary material: New Pyrroline Isolated from Antarctic Krill-Derived Actinomycetes *Nocardiopsis* LX-1 Combining with Molecular Networking

Ting Shi, Yan-Jing Li, Ze-Min Wang, Yi-Fei Wang, Bo Wang and Da-Yong Shi

**Figure S1.**  $^1\text{H}$  NMR spectrum of compound **1** ( $\text{CD}_3\text{OD}$ ).

**Figure S2.**  $^{13}\text{C}$  NMR spectrum of compound **1** ( $\text{CD}_3\text{OD}$ ).

**Figure S3.** HSQC spectrum of compound **1** ( $\text{CD}_3\text{OD}$ ).

**Figure S4.** COSY spectrum of compound **1** ( $\text{CD}_3\text{OD}$ ).

**Figure S5.** HMBC spectrum of compound **1** ( $\text{CD}_3\text{OD}$ ).

**Figure S6.** NOESY spectrum of compound **1** ( $\text{CD}_3\text{OD}$ ).

**Figure S7.** HR-ESI<sup>-</sup>-MS spectrum of compound **1**.

**Figure S8.** HR-ESI<sup>+</sup>-MS spectrum of compound **1**.

**Figure S9.** IR spectrum of compound **1**.

**Figure S10.**  $^1\text{H}$  NMR spectrum of compound **2** ( $\text{DMSO}-d_6$ ).

**Figure S11.**  $^{13}\text{C}$  NMR spectrum of compound **2** ( $\text{DMSO}-d_6$ ).

**Figure S12.** HR-ESI<sup>-</sup>-MS spectrum of compound **2**.

**Figure S13.** HR-ESI<sup>+</sup>-MS spectrum of compound **2**.

**Figure S14.**  $^1\text{H}$  NMR spectrum of compound **3** ( $\text{CDCl}_3$ ).

**Figure S15.**  $^{13}\text{C}$  NMR spectrum of compound **3** ( $\text{CDCl}_3$ ).

**Figure S16.** HR-ESI<sup>-</sup>-MS spectrum of compound **3**.

**Figure S17.** HR-ESI<sup>+</sup>-MS spectrum of compound **3**.

**Figure S18.**  $^1\text{H}$  NMR spectrum of compound **4** ( $\text{CDCl}_3$ ).

**Figure S19.**  $^{13}\text{C}$  NMR spectrum of compound **4** ( $\text{CDCl}_3$ ).

**Figure S20.** HR-ESI<sup>-</sup>-MS spectrum of compound **4**.

**Figure S21.** HR-ESI<sup>+</sup>-MS spectrum of compound **4**.

**Figure S22.**  $^1\text{H}$  NMR spectrum of compound **5** ( $\text{CD}_3\text{OD}$ ).

**Figure S23.**  $^{13}\text{C}$  NMR spectrum of compound **5** ( $\text{CD}_3\text{OD}$ ).

**Figure S24.** HR-ESI<sup>-</sup>-MS spectrum of compound **5**.

**Figure S25.** HR-ESI<sup>+</sup>-MS spectrum of compound **5**.

**Figure S26.**  $^1\text{H}$  NMR spectrum of compound **6** ( $\text{CDCl}_3$ ).

**Figure S27.**  $^{13}\text{C}$  NMR spectrum of compound **6** ( $\text{CDCl}_3$ ).

**Figure S28.** HR-ESI<sup>-</sup>-MS spectrum of compound **6**.

**Figure S29.** HR-ESI<sup>+</sup>-MS spectrum of compound **6**.

**Figure S30.**  $^1\text{H}$  NMR spectrum of compound **7** ( $\text{CDCl}_3$ ).

**Figure S31.**  $^{13}\text{C}$  NMR spectrum of compound **7** ( $\text{CDCl}_3$ ).

**Figure S32.** HR-ESI<sup>-</sup>-MS spectrum of compound **7**.

**Figure S33.** HR-ESI<sup>+</sup>-MS spectrum of compound **7**.

**Figure S34.**  $^1\text{H}$  NMR spectrum of compound **8** ( $\text{CD}_3\text{OD}$ ).

**Figure S35.**  $^{13}\text{C}$  NMR spectrum of compound **8** ( $\text{CD}_3\text{OD}$ ).

**Figure S36.** HR-ESI<sup>-</sup>-MS spectrum of compound **8**.

**Figure S37.** HR-ESI<sup>+</sup>-MS spectrum of compound **8**.

**Figure S38.**  $^1\text{H}$  NMR spectrum of compound **9** ( $\text{DMSO}-d_6$ ).

**Figure S39.**  $^{13}\text{C}$  NMR spectrum of compound **9** ( $\text{DMSO}-d_6$ ).

**Figure S40.** HR-ESI-MS spectrum of compound **9**.

**Figure S41.**  $^1\text{H}$  NMR spectrum of compound **10** ( $\text{DMSO}-d_6$ ).

**Figure S42.**  $^{13}\text{C}$  NMR spectrum of compound **10** ( $\text{DMSO}-d_6$ ).

**Figure S43.** HR-ESI-MS spectrum of compound **10**.

**Figure S44.** HR-ESI $^+$ -MS spectrum of compound **10**.

**Figure S45.**  $^1\text{H}$  NMR spectrum of compound **11** ( $\text{CD}_3\text{OD}$ ).

**Figure S46.**  $^{13}\text{C}$  NMR spectrum of compound **11** ( $\text{CD}_3\text{OD}$ ).

**Figure S47.** HR-APCI-MS spectrum of compound **11**.

**Figure S48.**  $^1\text{H}$  NMR spectrum of compound **12** ( $\text{CDCl}_3$ ).

**Figure S49.**  $^{13}\text{C}$  NMR spectrum of compound **12** ( $\text{CDCl}_3$ ).

**Figure S50.** HR-ESI-MS spectrum of compound **12**.

**Figure S51.** HR-ESI $^+$ -MS spectrum of compound **12**.

**Figure S52.** MS/MS spectrum of compound **a** (black) compared with GNPS library spectrum (green).

**Figure S53.** MS/MS spectrum of compound **b** (black) compared with GNPS library spectrum (green).

**Figure S54.** MS/MS spectrum of compound **c** (black) compared with GNPS library spectrum (green).

**Figure S55.** MS/MS spectrum of compound **d** (black) compared with GNPS library spectrum (green).

**Figure S56.** MS/MS spectrum of compound **e** (black) compared with GNPS library spectrum (green).

**Figure S57.** MS/MS spectrum of compound **f** (black) compared with GNPS library spectrum (green).

**Figure S58.** MS/MS spectrum of compound **g** (black) compared with GNPS library spectrum (green).

**Figure S59.** MS/MS spectrum of compound **h** (black) compared with GNPS library spectrum (green).

**Figure S60.** MS/MS spectrum of compound **i** (black) compared with GNPS library spectrum (green).

**Figure S61.** MS/MS spectrum of compound **j** (black) compared with GNPS library spectrum (green).

**Figure S62.** MS/MS spectrum of compound **k** (black) compared with GNPS library spectrum (green).

**Figure S63.** MS/MS spectrum of compound **l** (black) compared with GNPS library spectrum (green).

**Figure S64.** MS/MS spectrum of compound **m** (black) compared with GNPS library spectrum (green).

**Figure S65.** MS/MS spectrum of compound **n** (black) compared with GNPS library spectrum (green).

**Figure S66.** MS/MS spectrum of compound **o** (black) compared with GNPS library spectrum (green).

**Figure S67.** MS/MS spectrum of compound **p** (black,  $[\text{M}+\text{H}]^+$ ) compared with GNPS library spectrum (green).

**Figure S68.** MS/MS spectrum of compound **p** (black,  $[\text{M}+\text{Na}]^+$ ) compared with GNPS library spectrum (green).

**Table S1.** NMR spectroscopic data (400/100 MHz) of daidzein (**2**) in  $\text{DMSO}-d_6$ .

**Table S2.**  $^1\text{H}$  NMR spectroscopic data (400 MHz) of compounds **3–8** in  $\text{CDCl}_3$ .

**Table S3.**  $^{13}\text{C}$  NMR spectroscopic data (100 MHz) of compounds **3–8** in  $\text{CDCl}_3$ .

**Table S4.** Specific OR of cyclic dipeptides **3–8** in MeOH.

**Table S5.** NMR spectroscopic data (400/100 MHz) of compounds **9–12**.

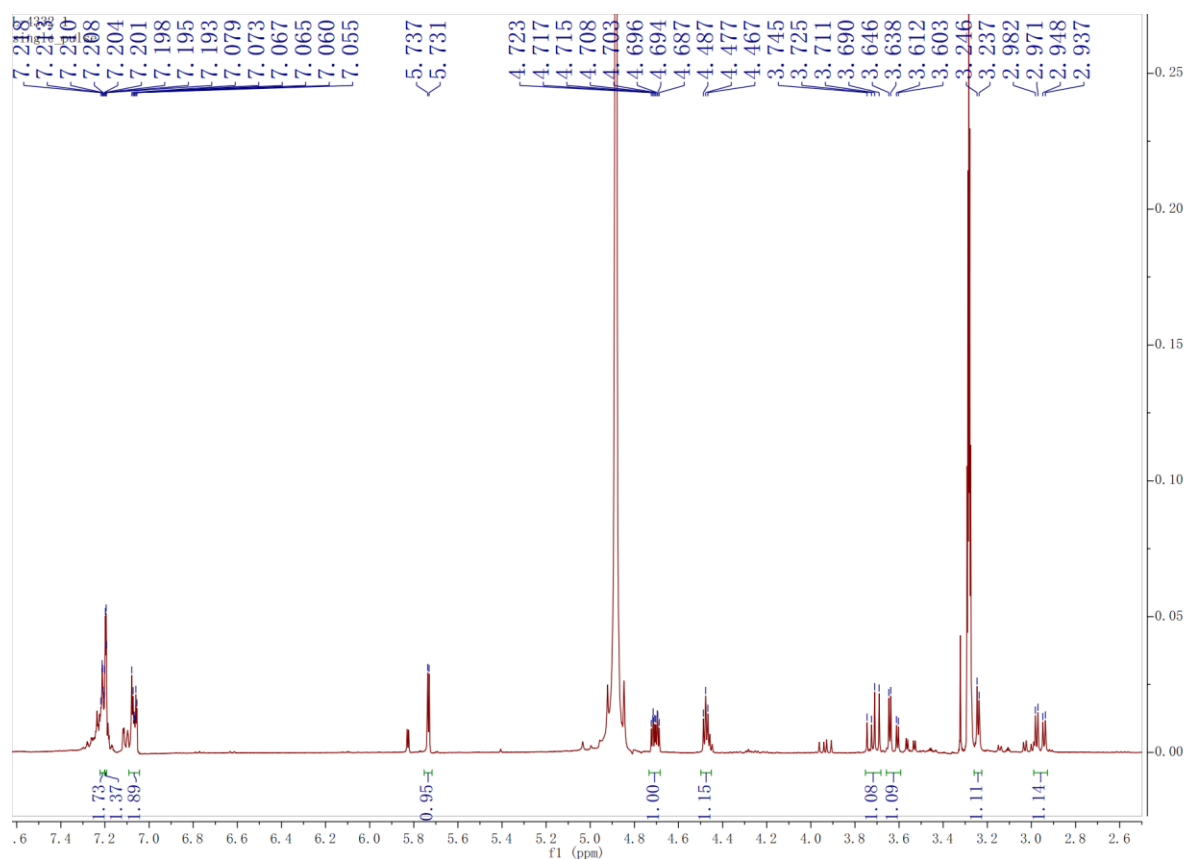

**Figure S1.** <sup>1</sup>H NMR spectrum of compound **1** (CD<sub>3</sub>OD).

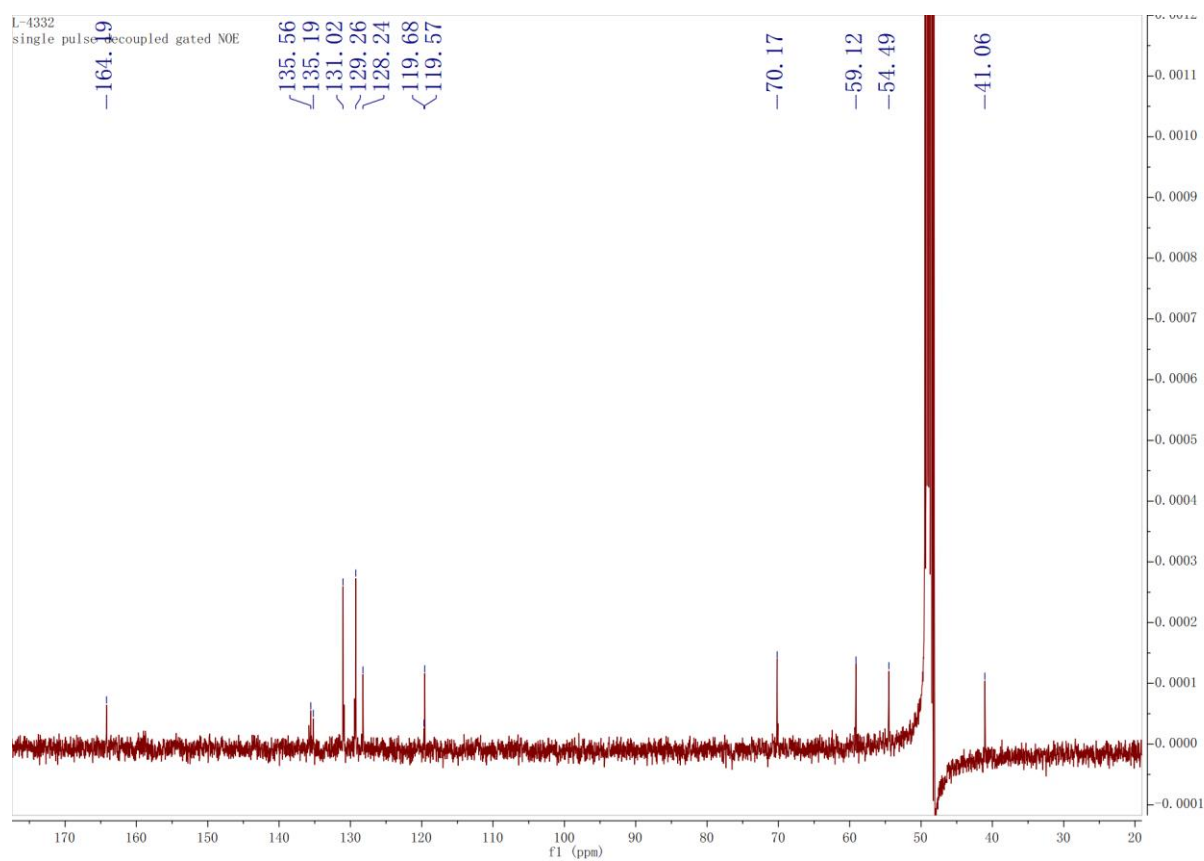

**Figure S2.** <sup>13</sup>C NMR spectrum of compound **1** (CD<sub>3</sub>OD).

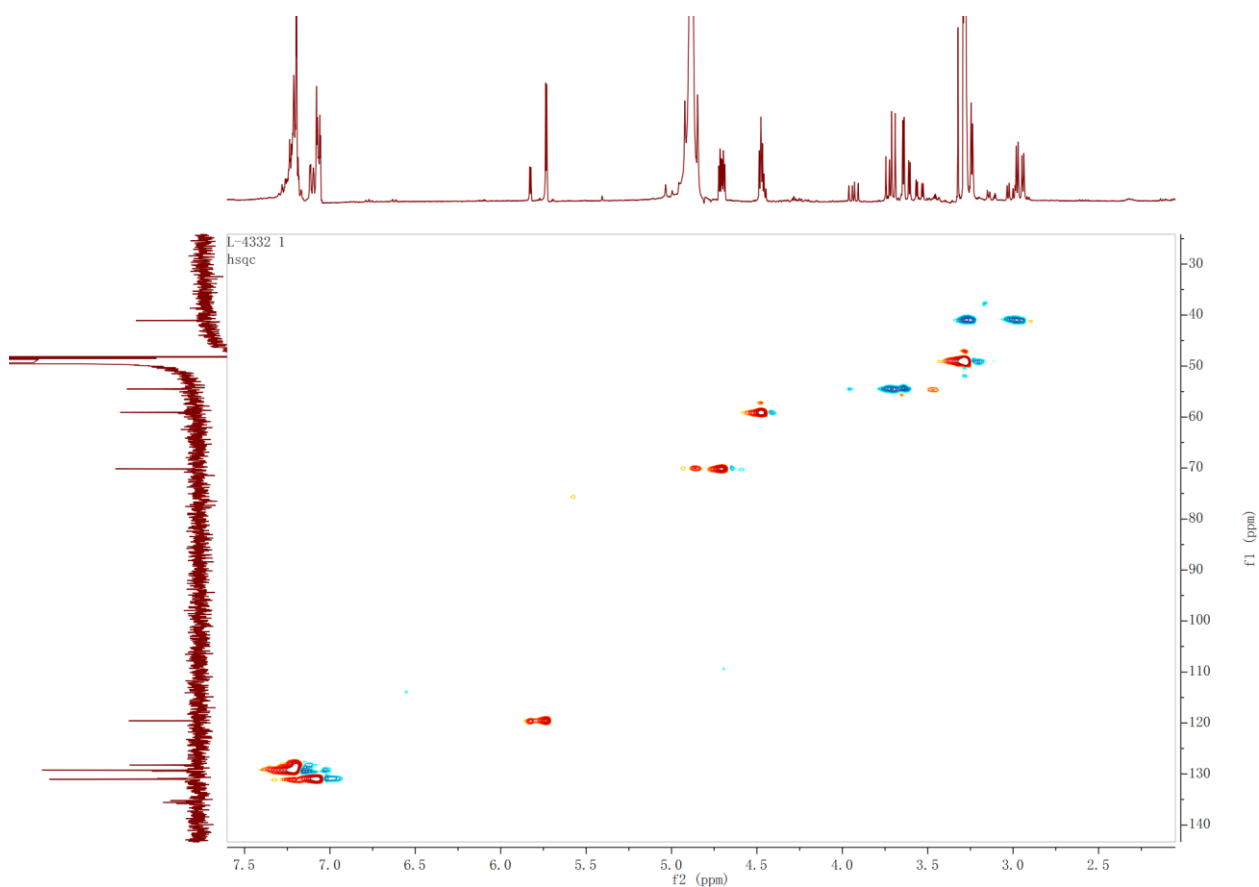

**Figure S3.** HSQC spectrum of compound **1** (CD<sub>3</sub>OD).

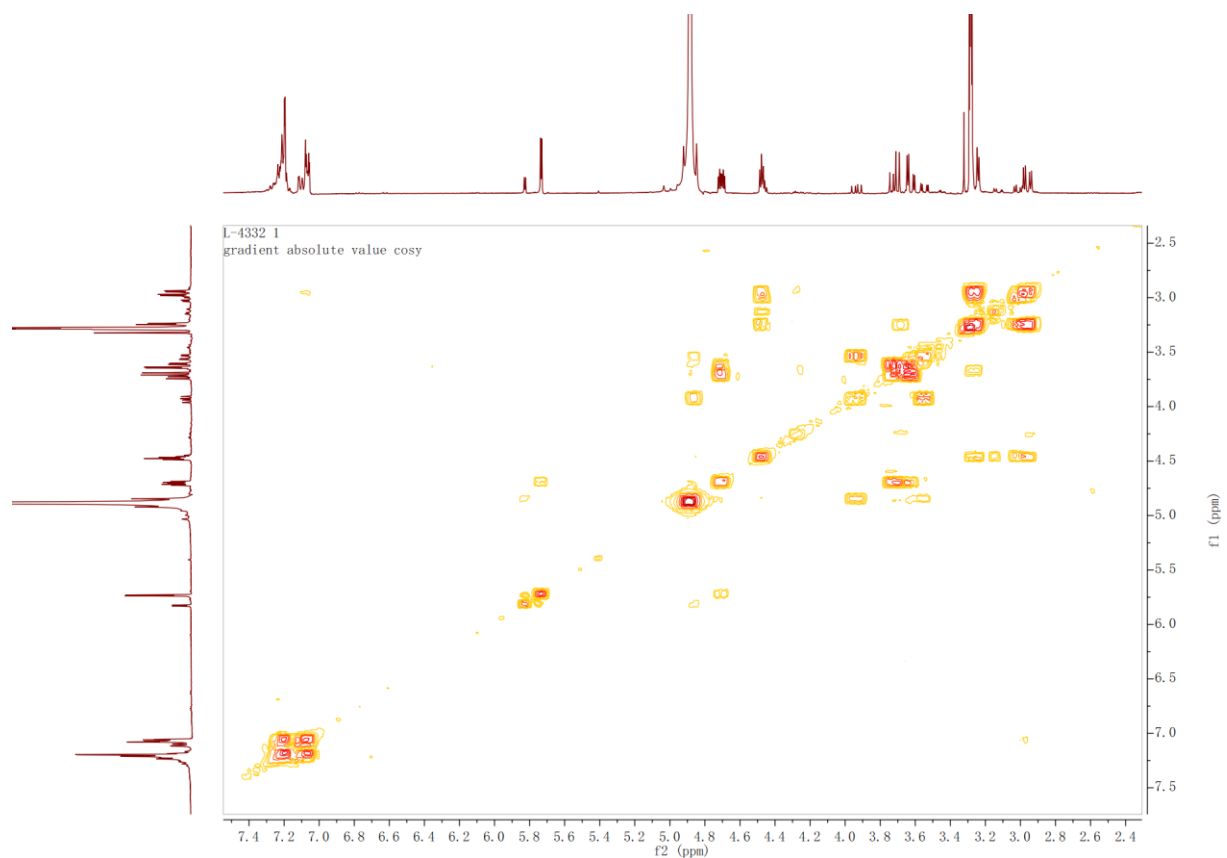

**Figure S4.** COSY spectrum of compound **1** (CD<sub>3</sub>OD).

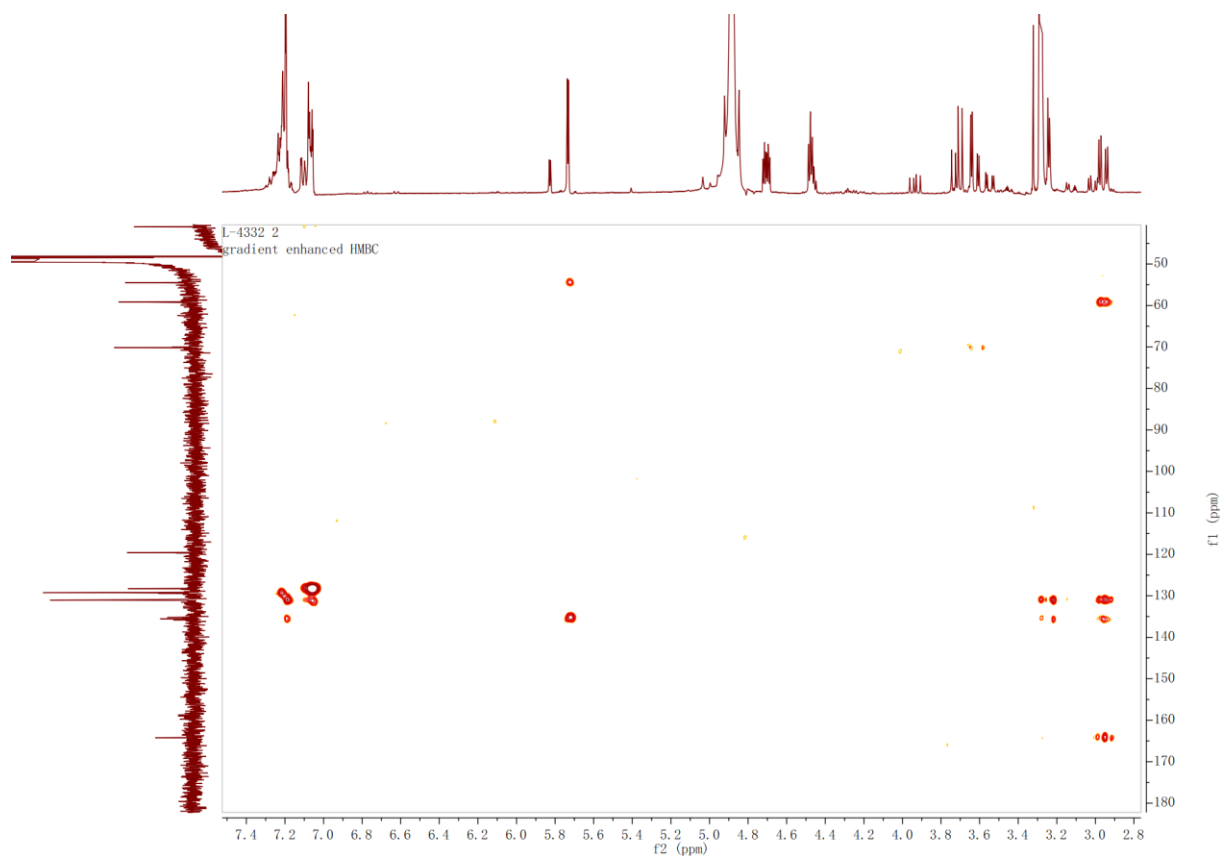

**Figure S5.** HMBC spectrum of compound **1** (CD<sub>3</sub>OD).

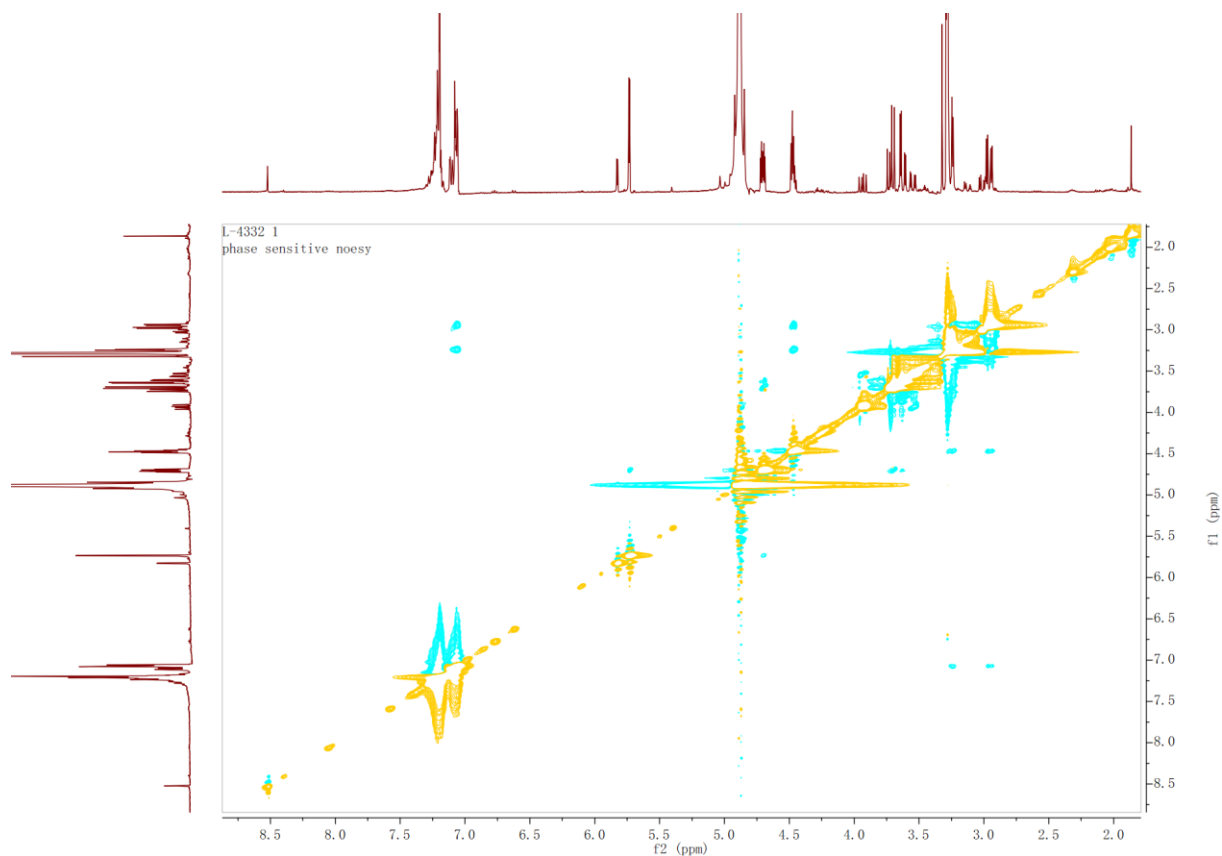

**Figure S6.** NOESY spectrum of compound **1** (CD<sub>3</sub>OD).

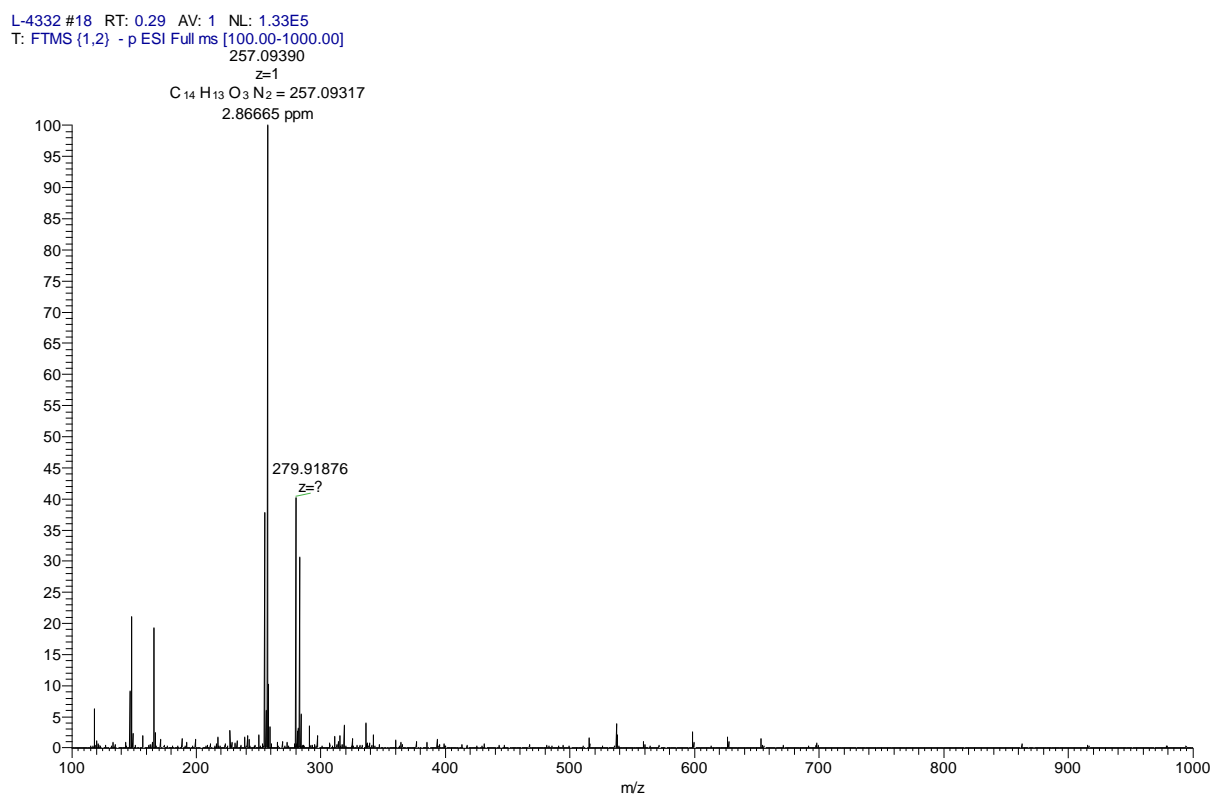**Figure S7.** HR-ESI<sup>-</sup>-MS spectrum of compound **1**.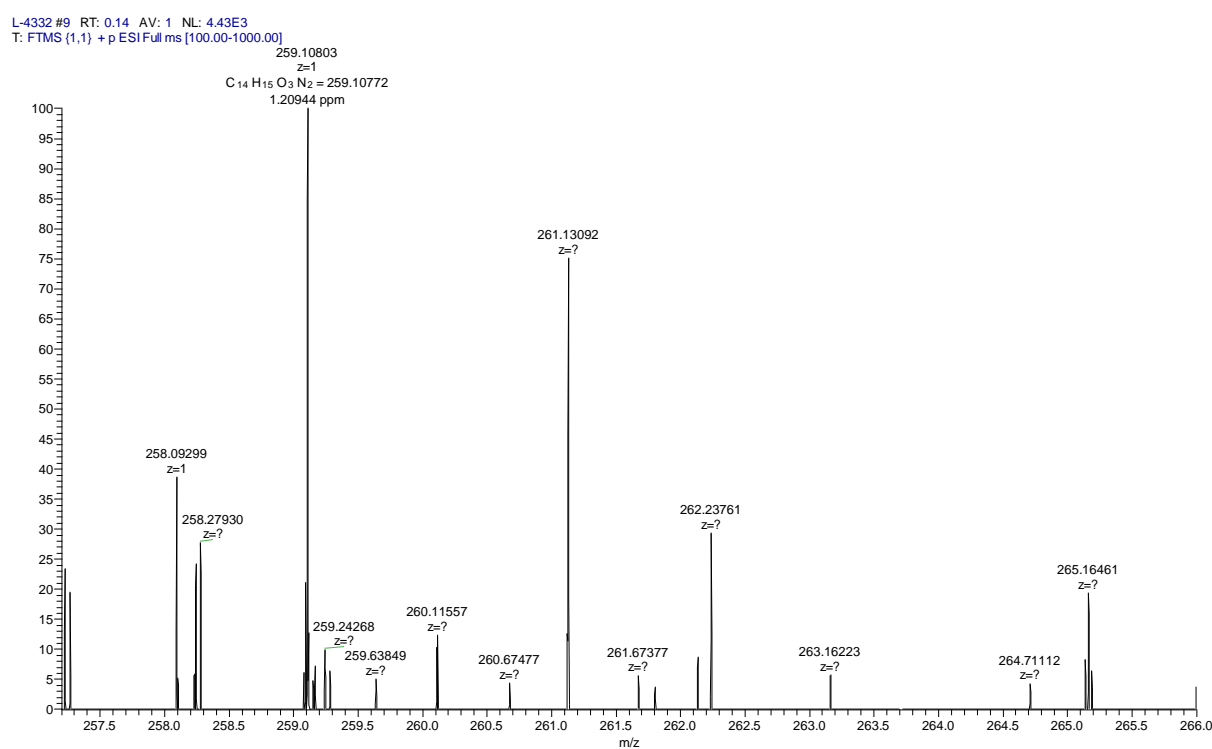**Figure S8.** HR-ESI<sup>+</sup>-MS spectrum of compound **1**.

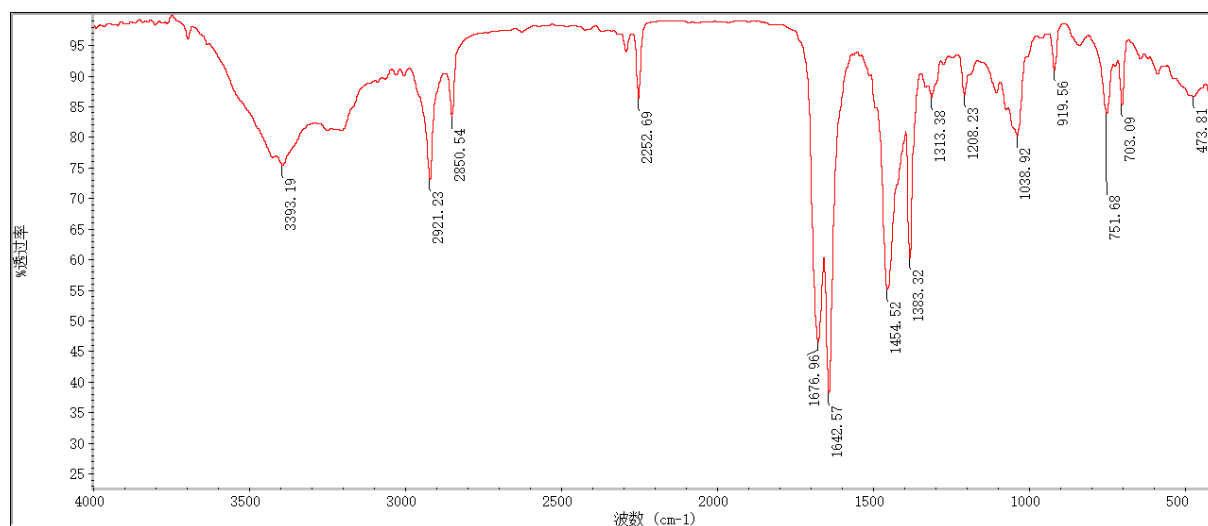**Figure S9.** IR spectrum of compound **1**.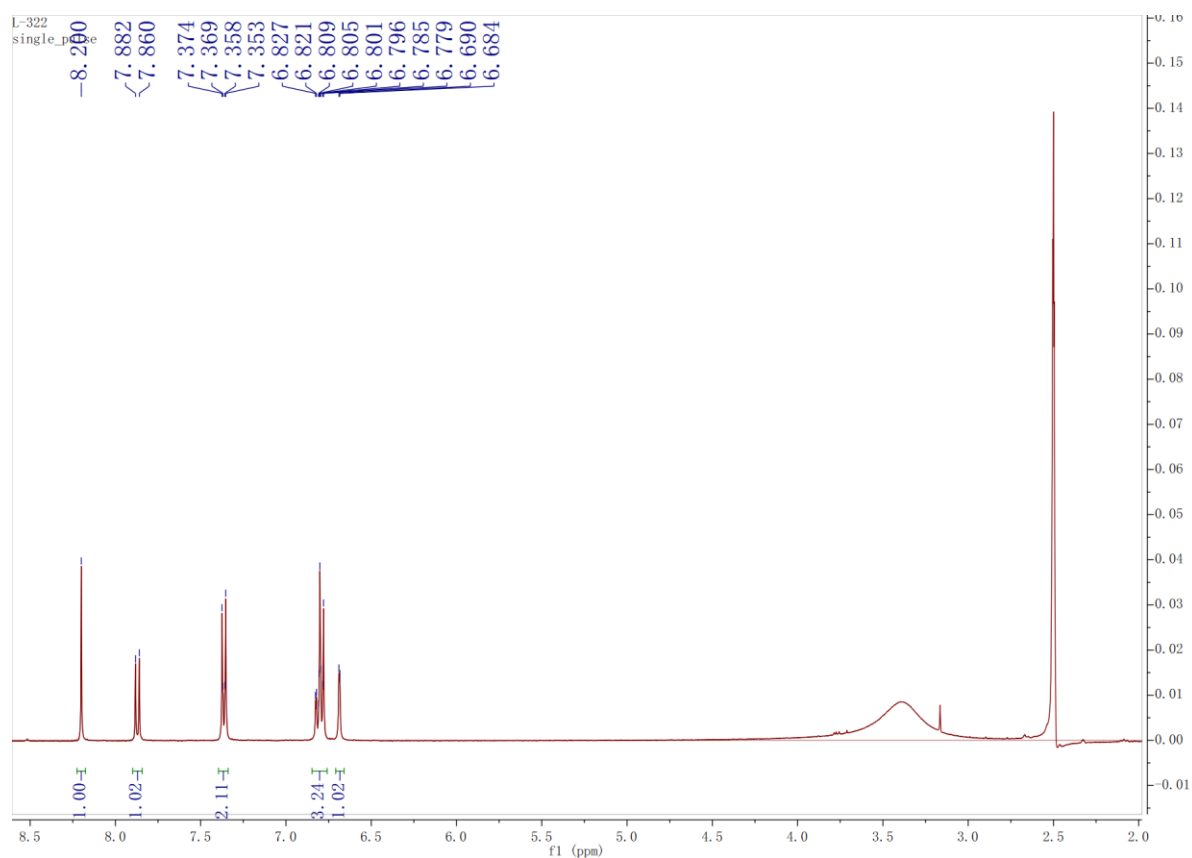**Figure S10.** <sup>1</sup>H NMR spectrum of compound **2** (DMSO-*d*<sub>6</sub>).

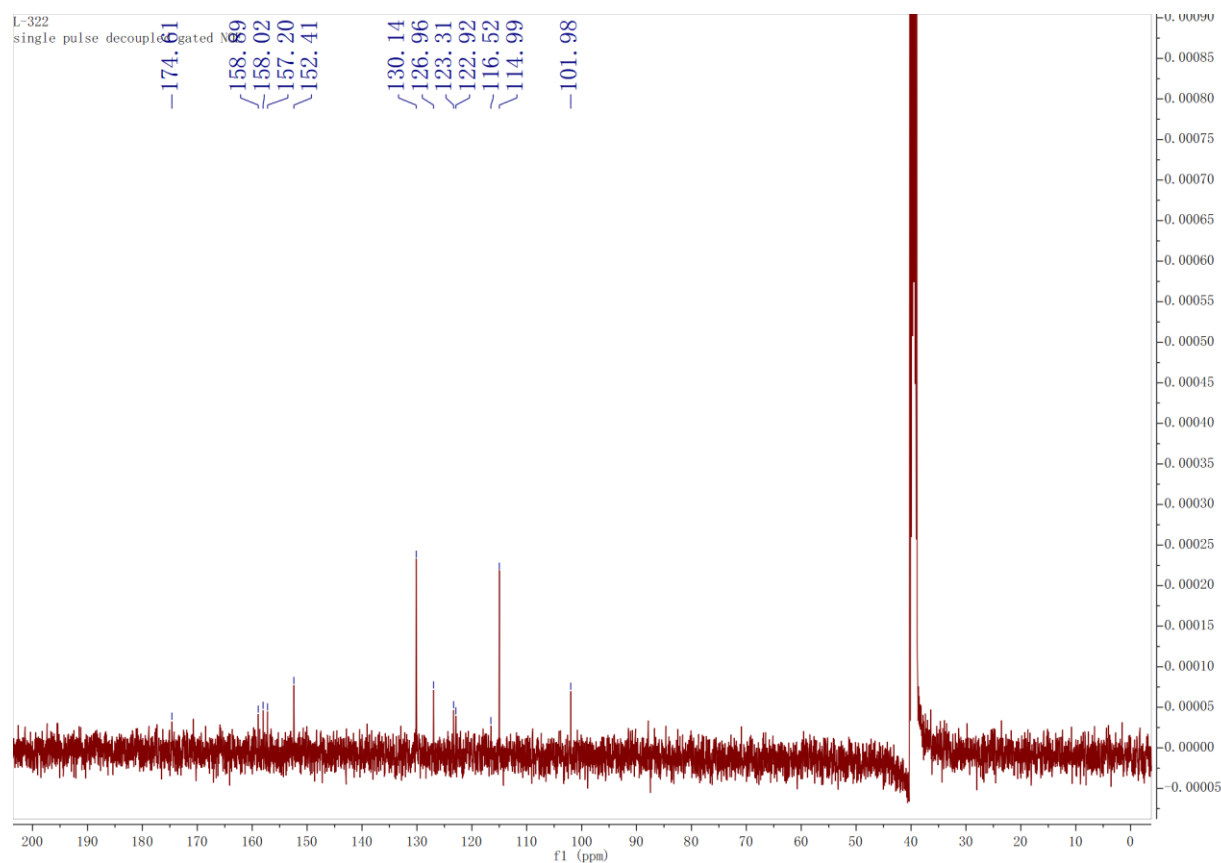

**Figure S11.**  $^{13}\text{C}$  NMR spectrum of compound **2** ( $\text{DMSO}-d_6$ ).

L-322 #10 RT: 0.16 AV: 1 SB: 35 0.01-0.07, 0.52-1.03 NL: 7.99E4  
T: FTMS (1,2) - p ESI Full ms [50.00-750.00]

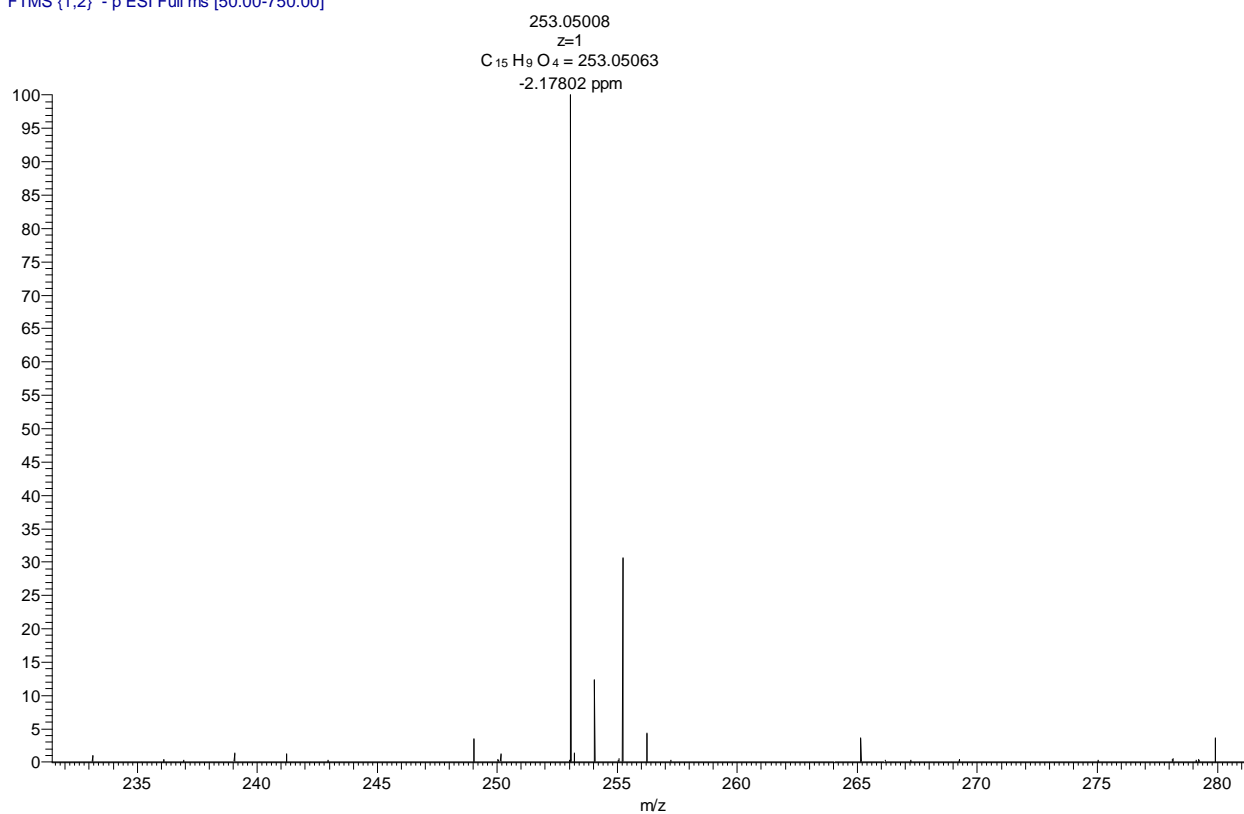

**Figure S12.** HR-ESI-MS spectrum of compound **2**.



L-322 #13 RT: 0.21 AV: 1 NL: 2.03E4  
T: FTMS (1,1) + p ESI Full ms [50.00-750.00]

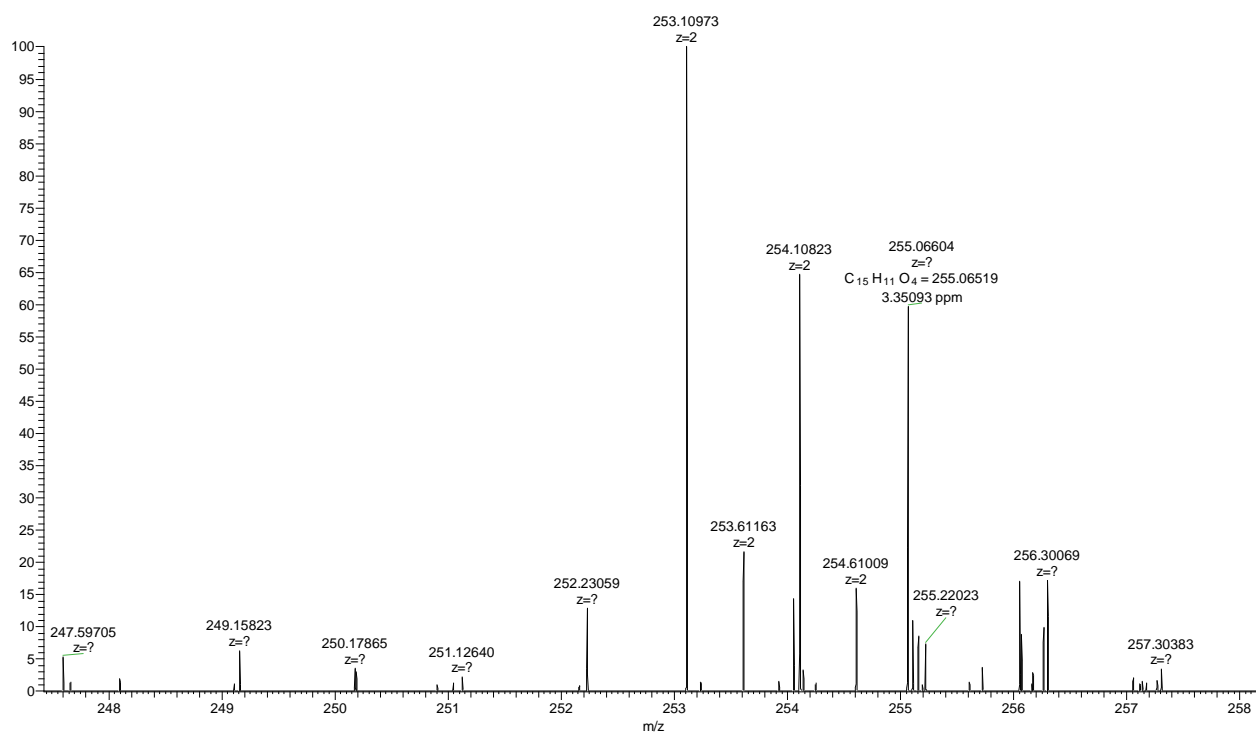

Figure S13. HR-ESI<sup>+</sup>-MS spectrum of compound 2.

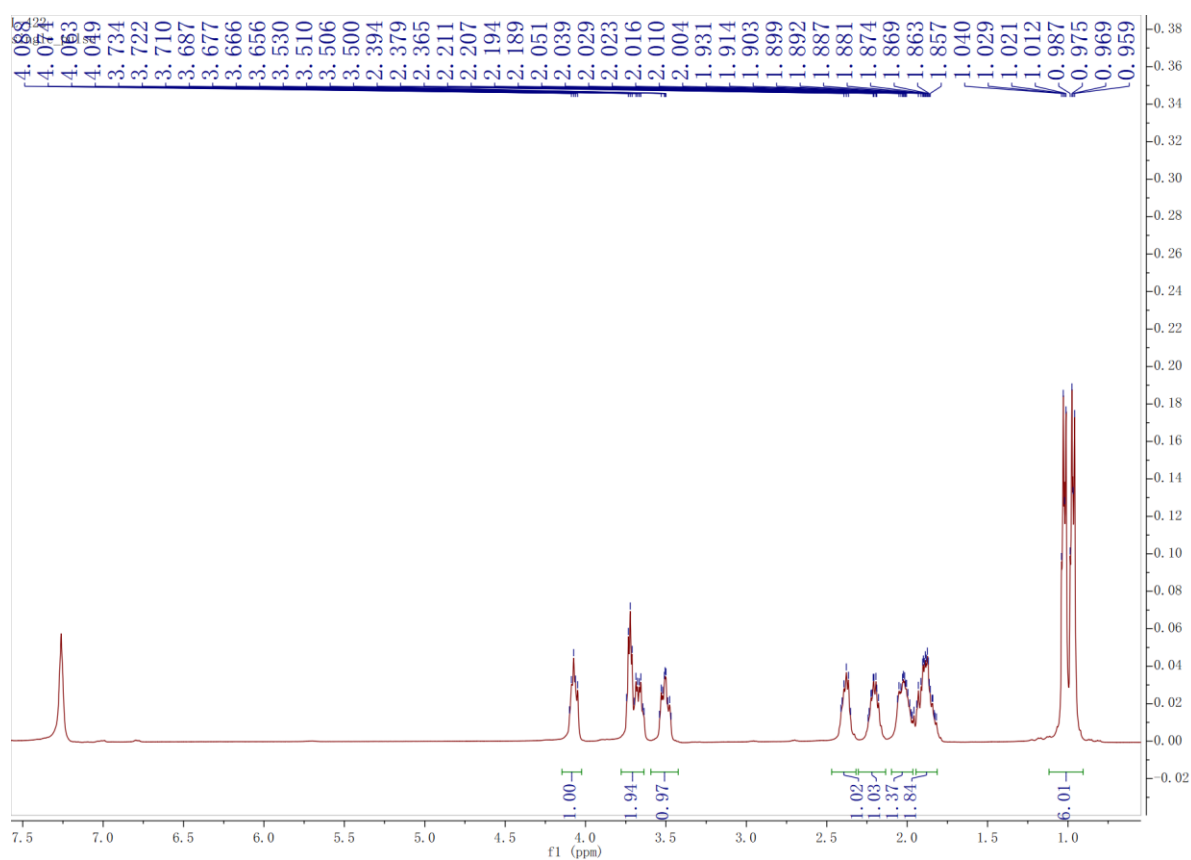

Figure S14. <sup>1</sup>H NMR spectrum of compound 3 (CDCl<sub>3</sub>).

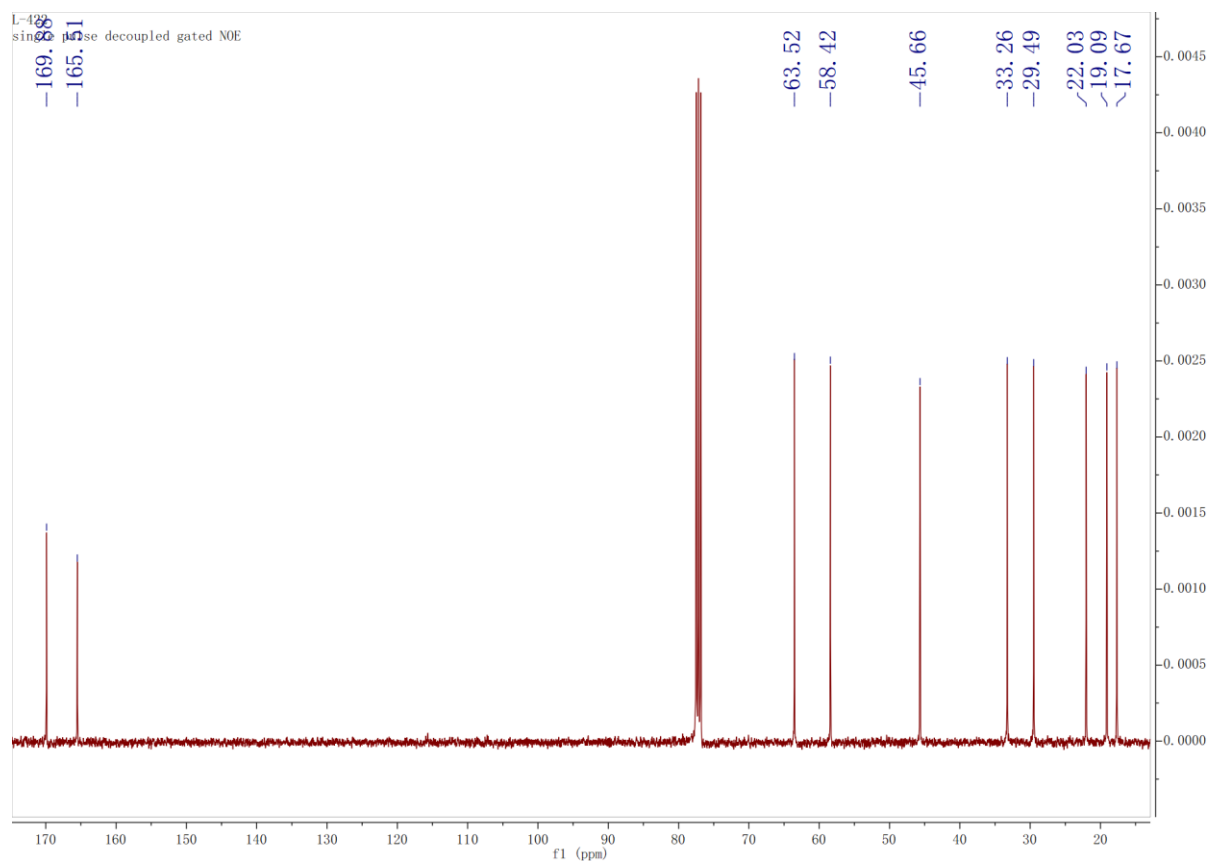

**Figure S15.** <sup>13</sup>C NMR spectrum of compound **3** (CDCl<sub>3</sub>).

L-422 #8 RT: 0.13 AV: 1 SB: 35 0.01-0.07, 0.52-1.03 NL: 4.61E4  
T: FTMS (1,2) - p ESI Full ms [50.00-750.00]

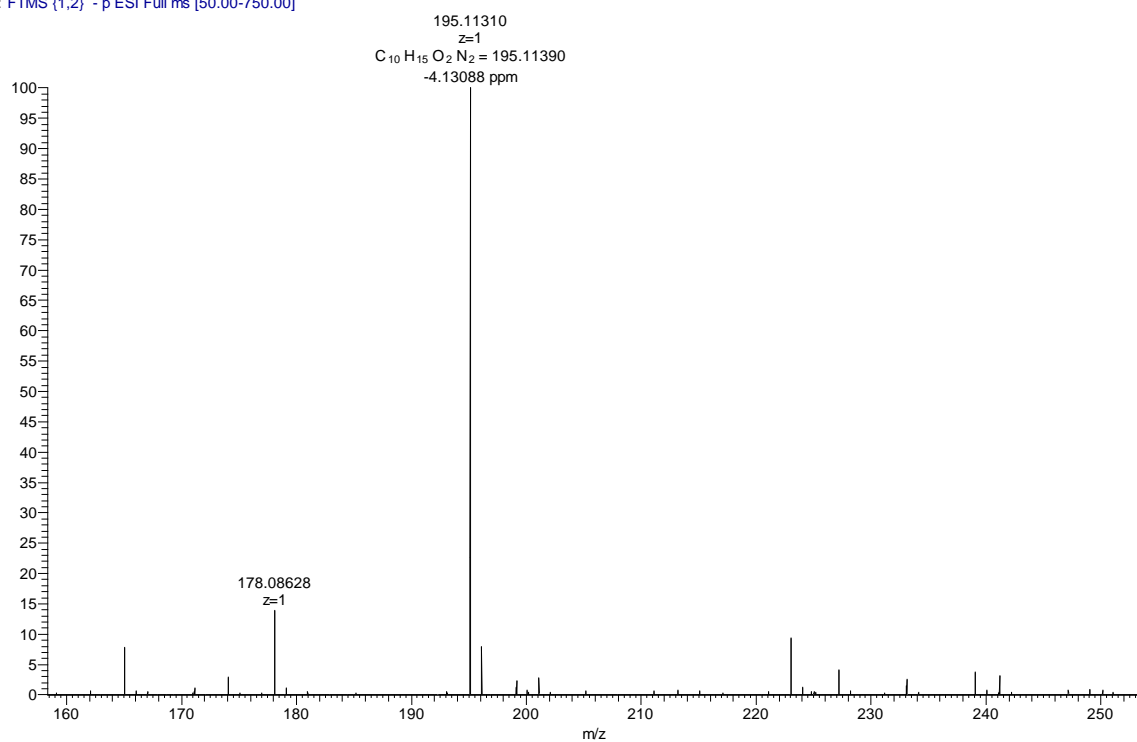

**Figure S16.** HR-ESI-MS spectrum of compound **3**.

L-422 #11 RT: 0.18 AV: 1 NL: 5.03E4  
T: FTMS (1,1) + p ESI Full ms [50.00-750.00]

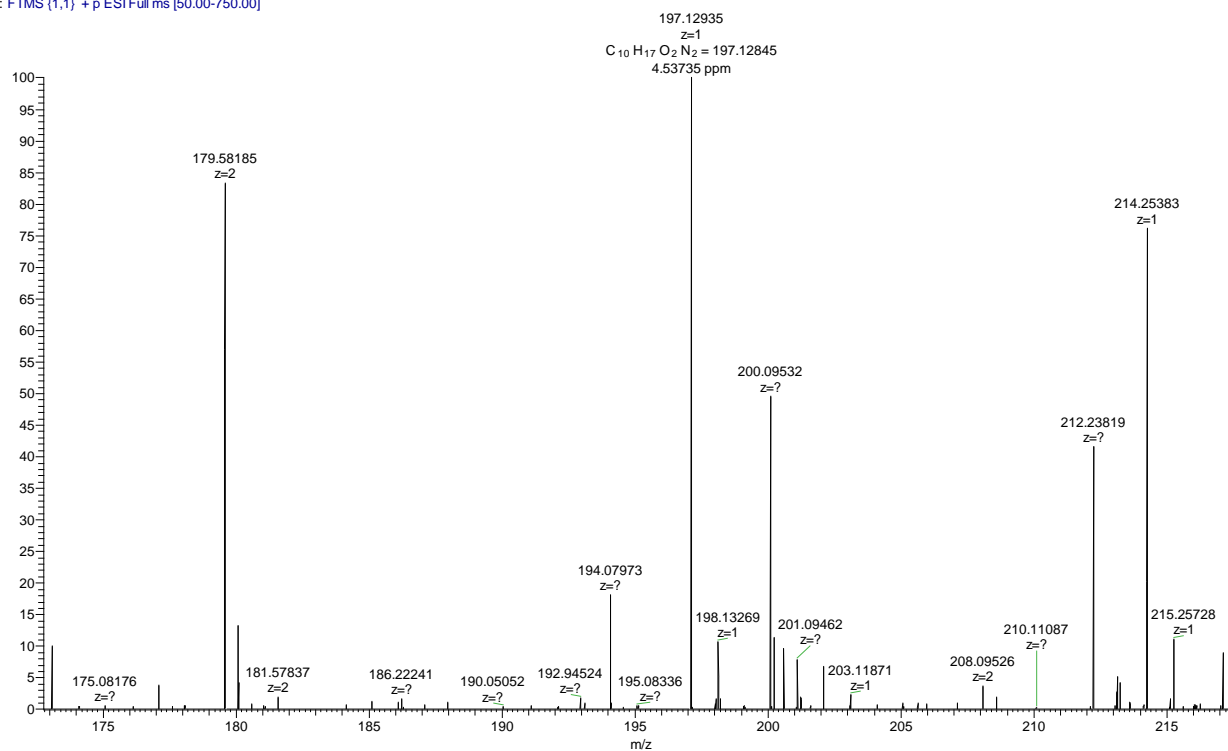

Figure S17. HR-ESI<sup>+</sup>-MS spectrum of compound 3.

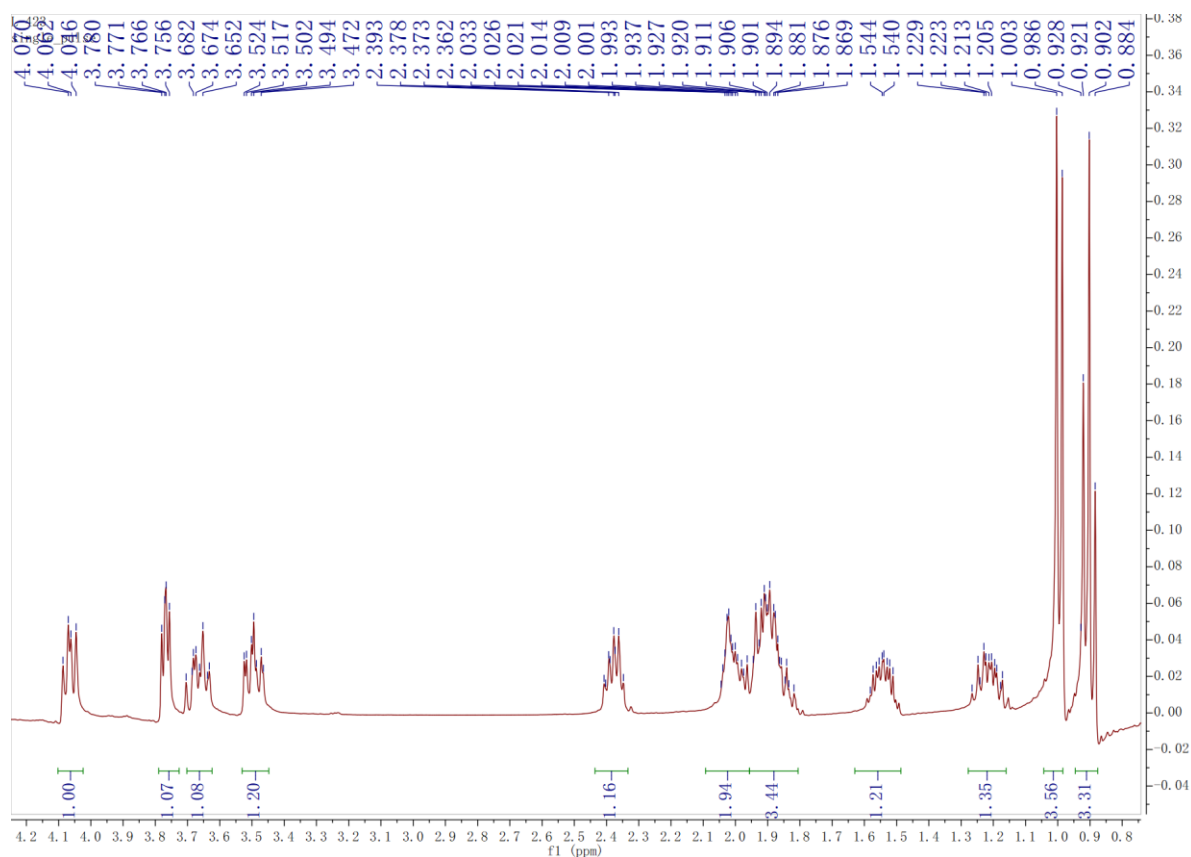

Figure S18. <sup>1</sup>H NMR spectrum of compound 4 (CDCl<sub>3</sub>).

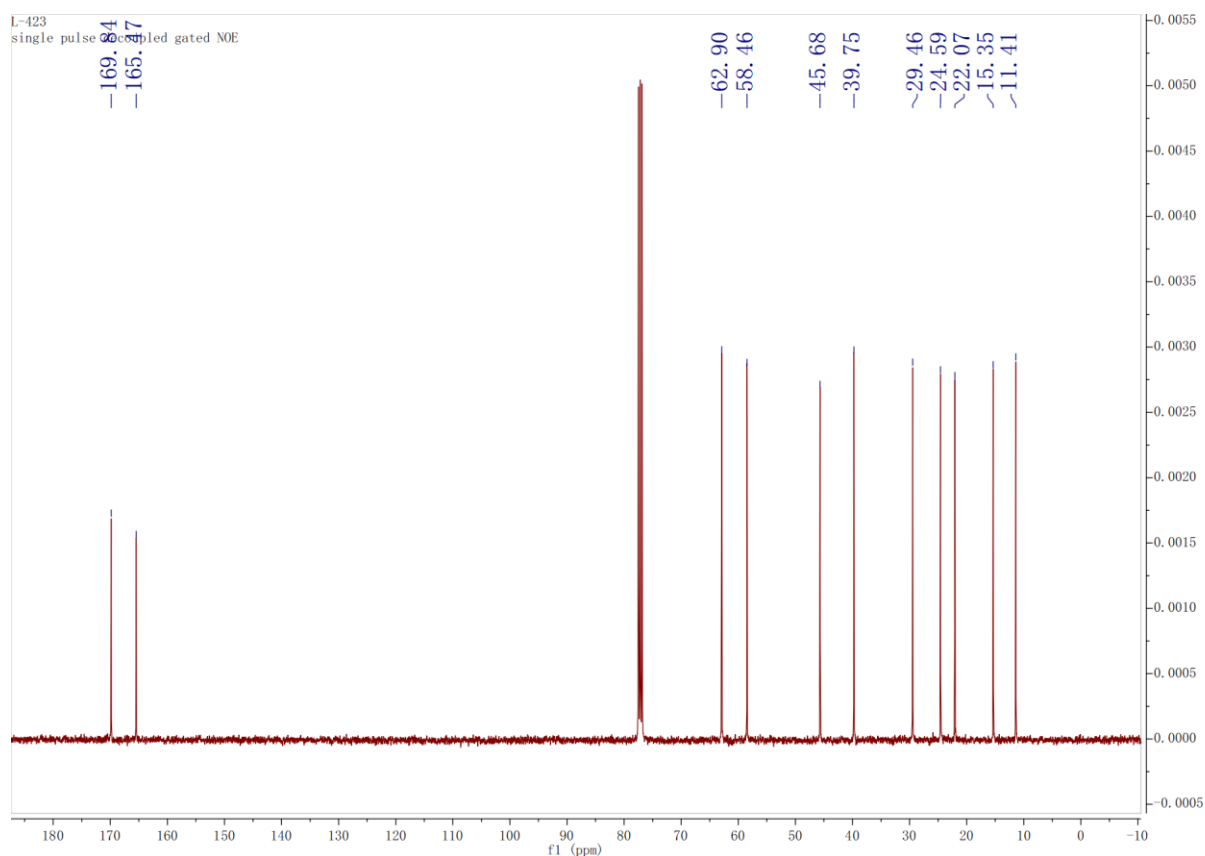

**Figure S19.**  $^{13}\text{C}$  NMR spectrum of compound **4** ( $\text{CDCl}_3$ ).

L-423 #8 RT: 0.13 AV: 1 SB: 35 0.01-0.07, 0.52-1.02 NL: 8.34E4  
T: FTMS {1,2} - p ESI Full ms [50.00-750.00]

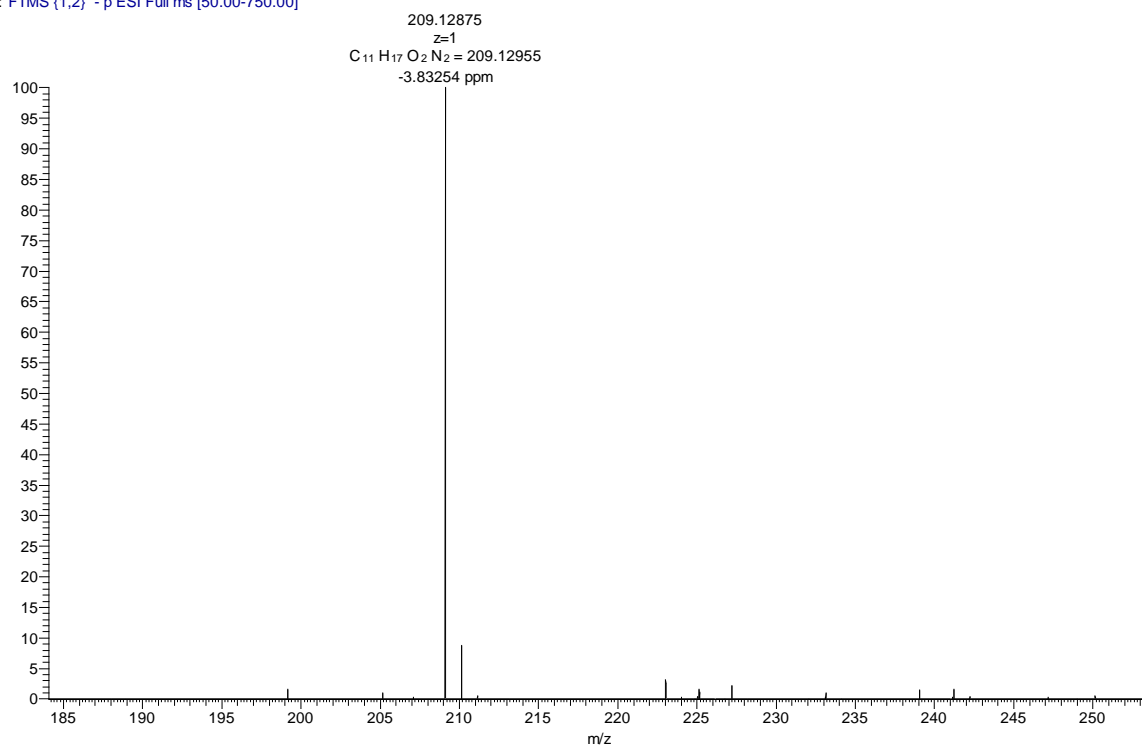

**Figure S20.** HR-ESI-MS spectrum of compound **4**.

L-423 #11 RT: 0.17 AV: 1 NL: 1.13E5  
T: FTMS (1,1) + p ESI Full ms [50.00-750.00]

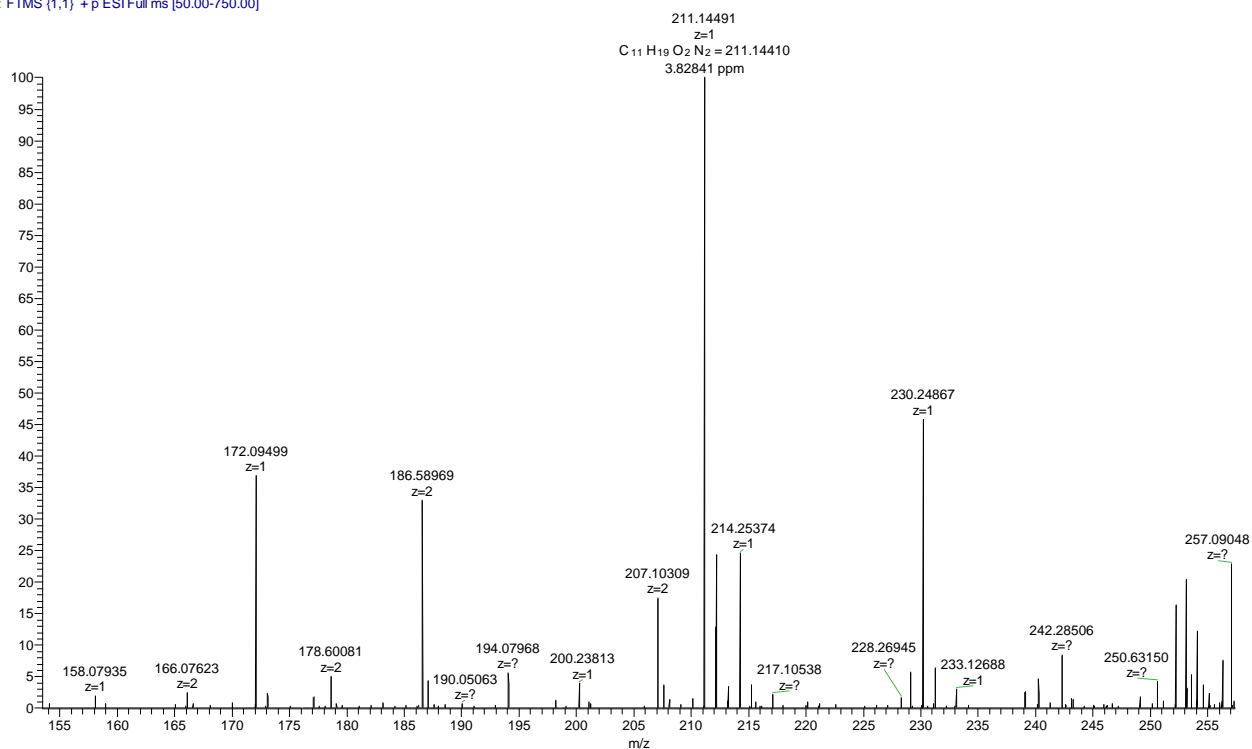

Figure S21. HR-ESI<sup>+</sup>-MS spectrum of compound 4.

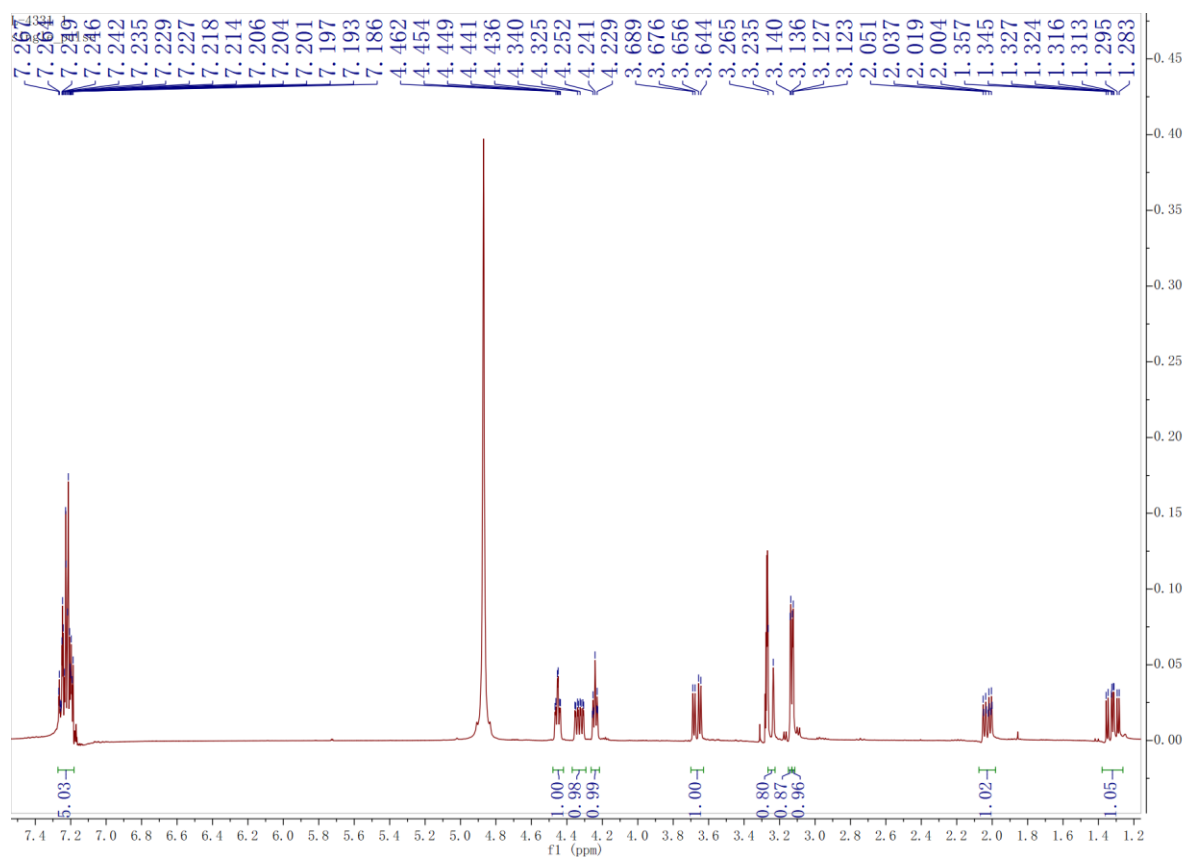

Figure S22. <sup>1</sup>H NMR spectrum of compound 5 (CD<sub>3</sub>OD).

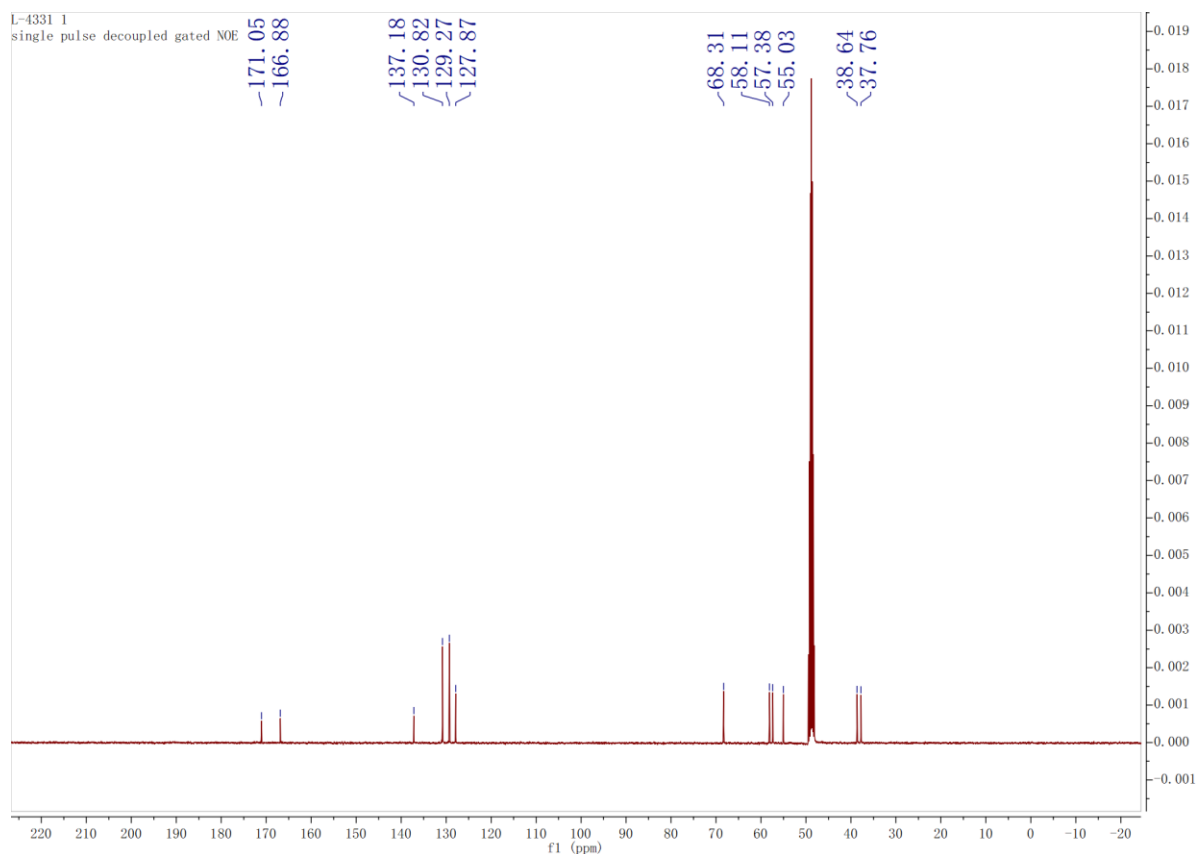

**Figure S23.**  $^{13}\text{C}$  NMR spectrum of compound **5** ( $\text{CD}_3\text{OD}$ ).

L-4331 #16 RT: 0.26 AV: 1 SB: 35 0.01-0.07, 0.52-1.03 NL: 2.93E5  
T: FTMS {1,2} - p ESI Full ms [50.00-750.00]

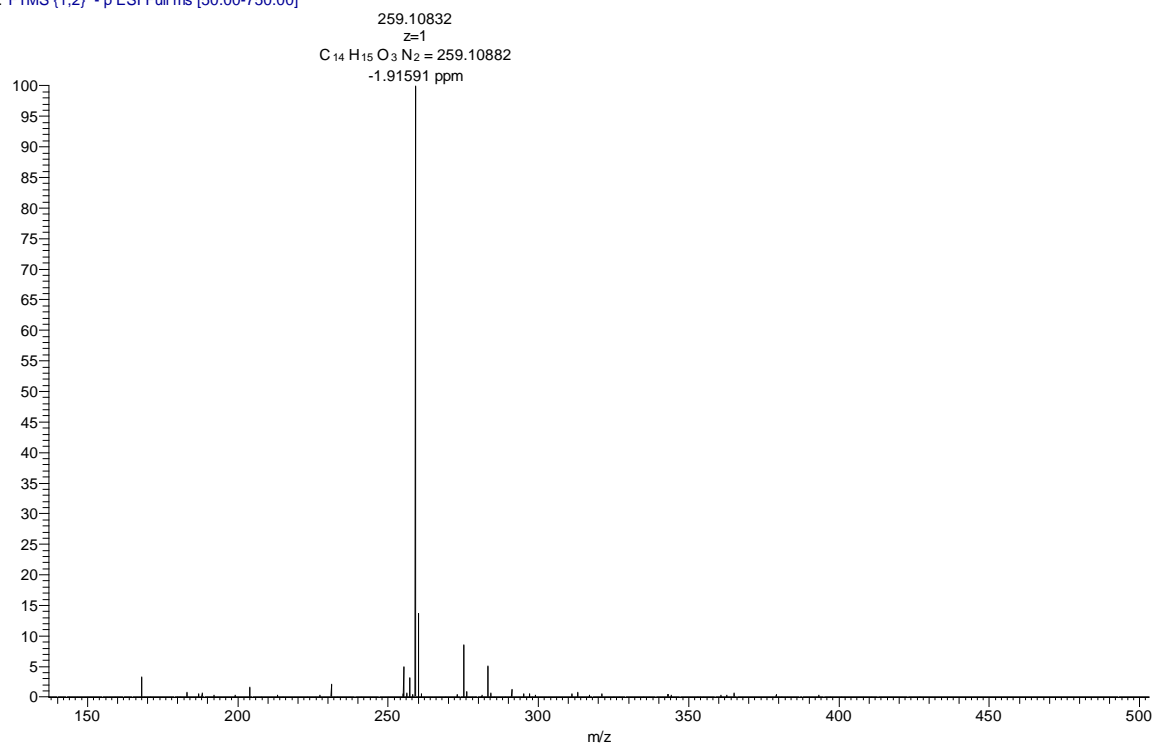

**Figure S24.** HR-ESI-MS spectrum of compound **5**.

L-4331 #11 RT: 0.18 AV: 1 NL: 5.25E4  
T: FTMS (1,1) + p ESI Full ms [50.00-750.00]

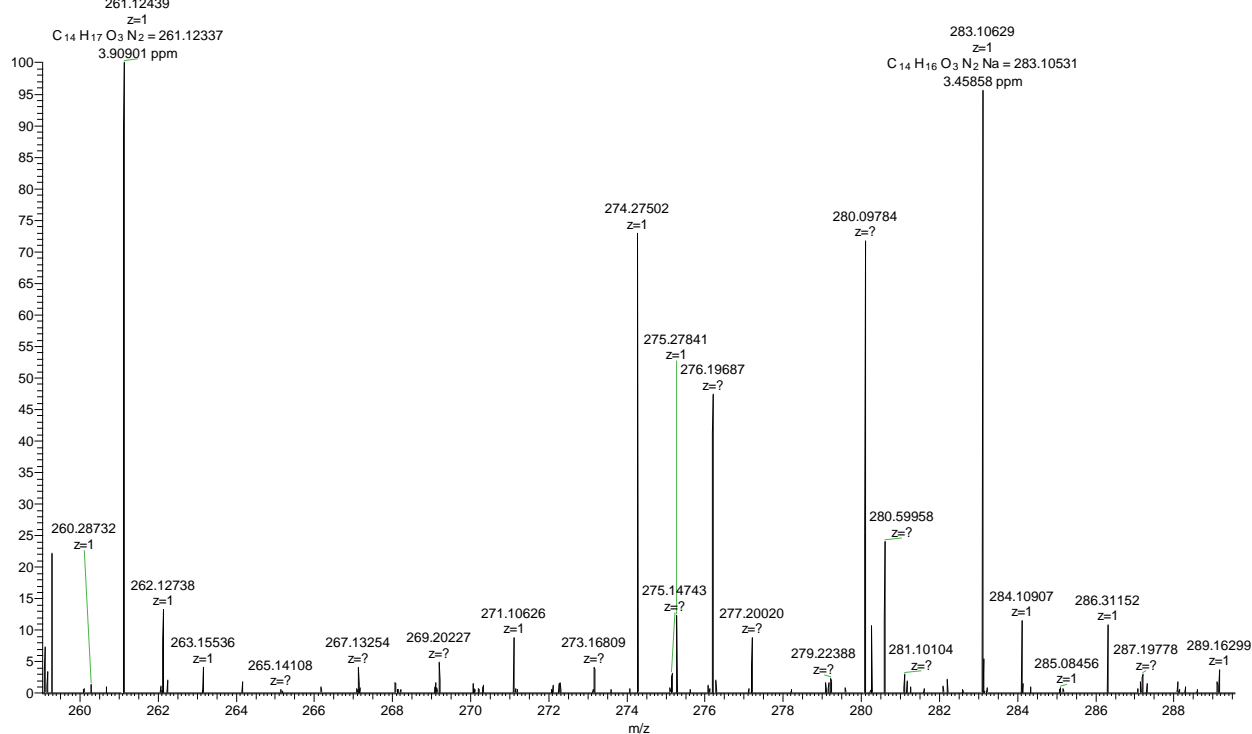

Figure S25. HR-ESI<sup>+</sup>-MS spectrum of compound 5.

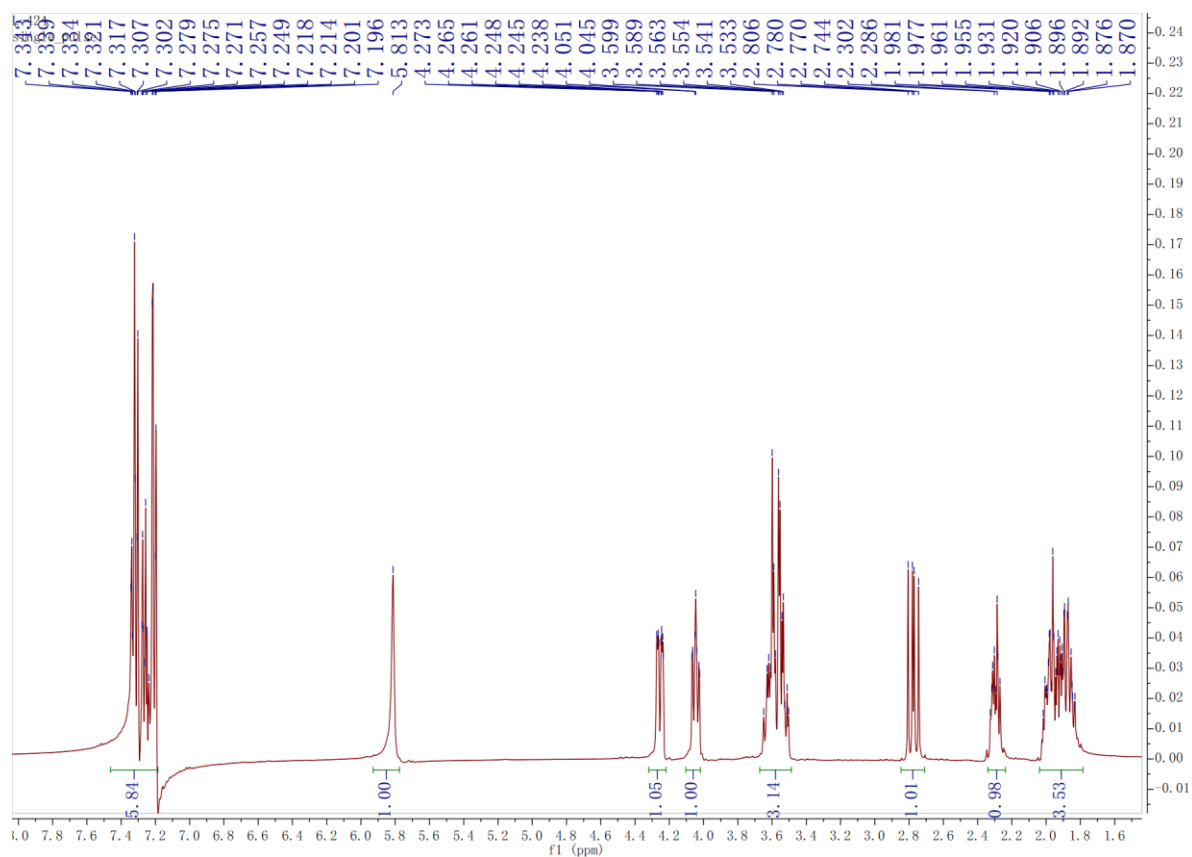

Figure S26. <sup>1</sup>H NMR spectrum of compound 6 (CDCl<sub>3</sub>).

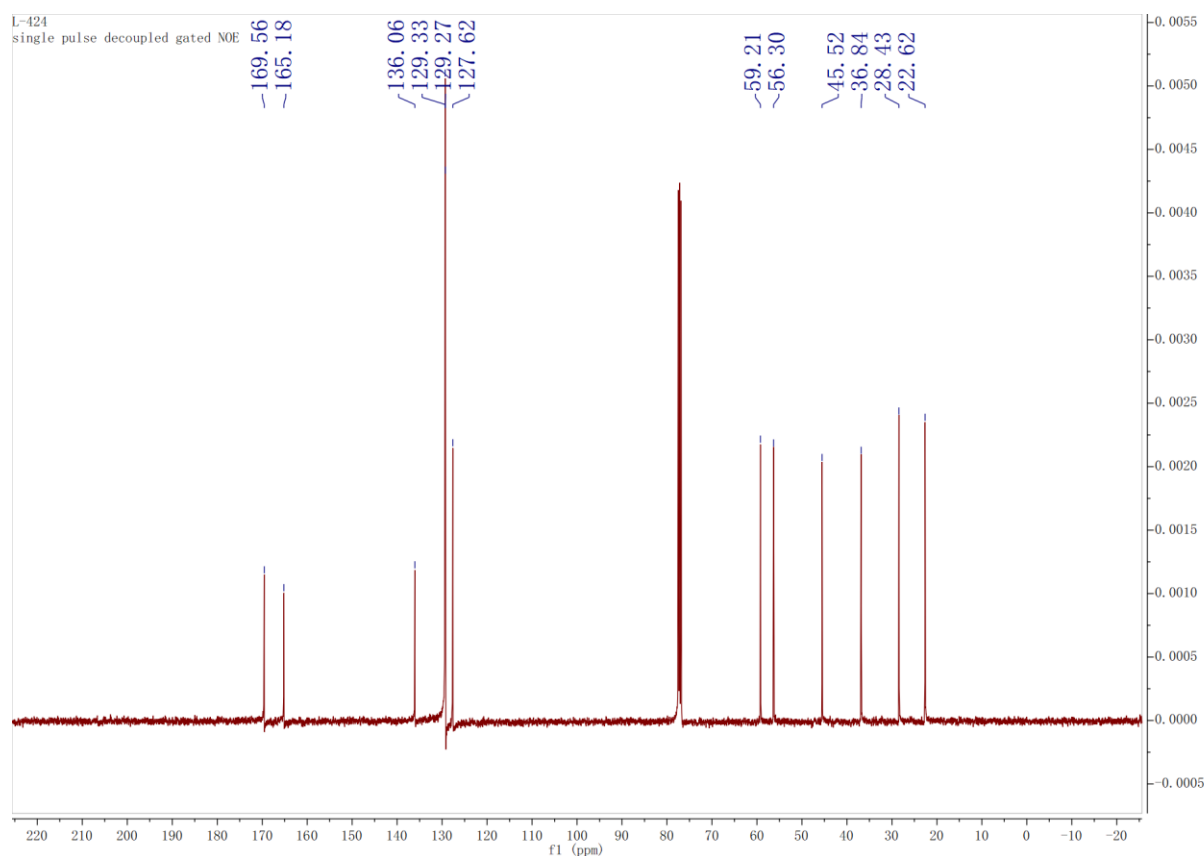

**Figure S27.**  $^{13}\text{C}$  NMR spectrum of compound **6** ( $\text{CDCl}_3$ ).

L-424 #16 RT: 0.26 AV: 1 SB: 35 0.01-0.07 , 0.52-1.02 NL: 2.12E5  
T: FTMS {1,2} - p ESI Full ms [50.00-750.00]

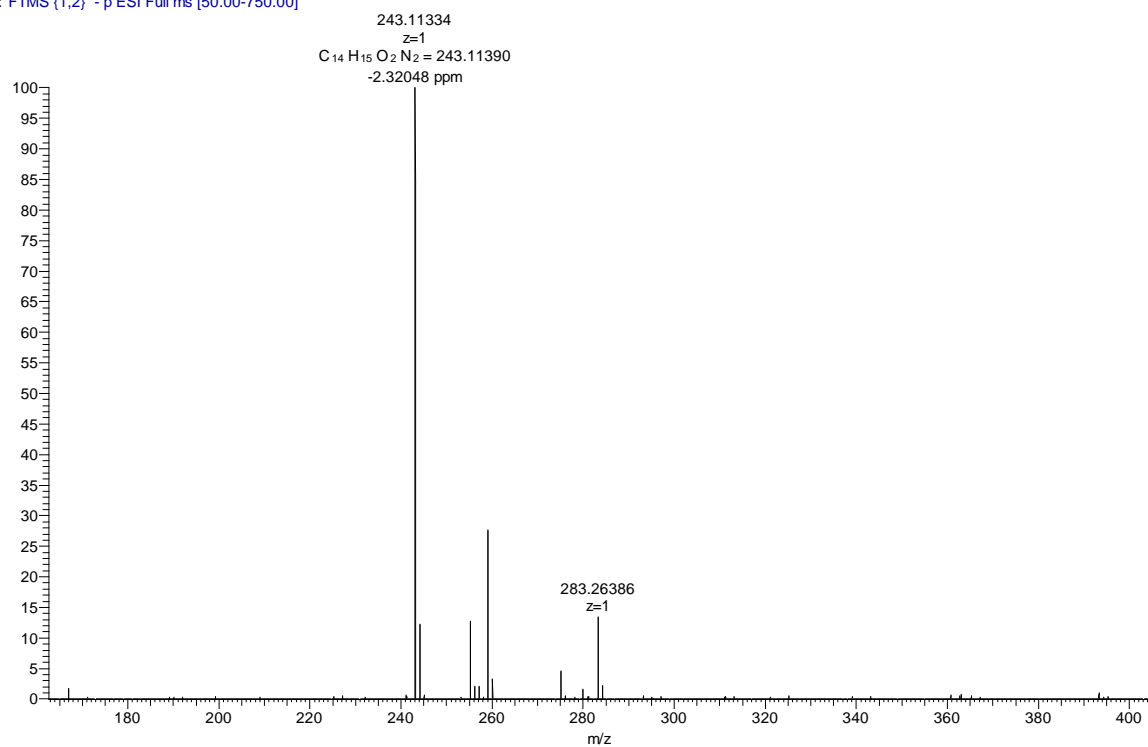

**Figure S28.** HR-ESI-MS spectrum of compound **6**.



L-424 #11 RT: 0.18 AV: 1 NL: 7.90E4  
T: FTMS (1,1) + p ESI Full ms [50.00-750.00]

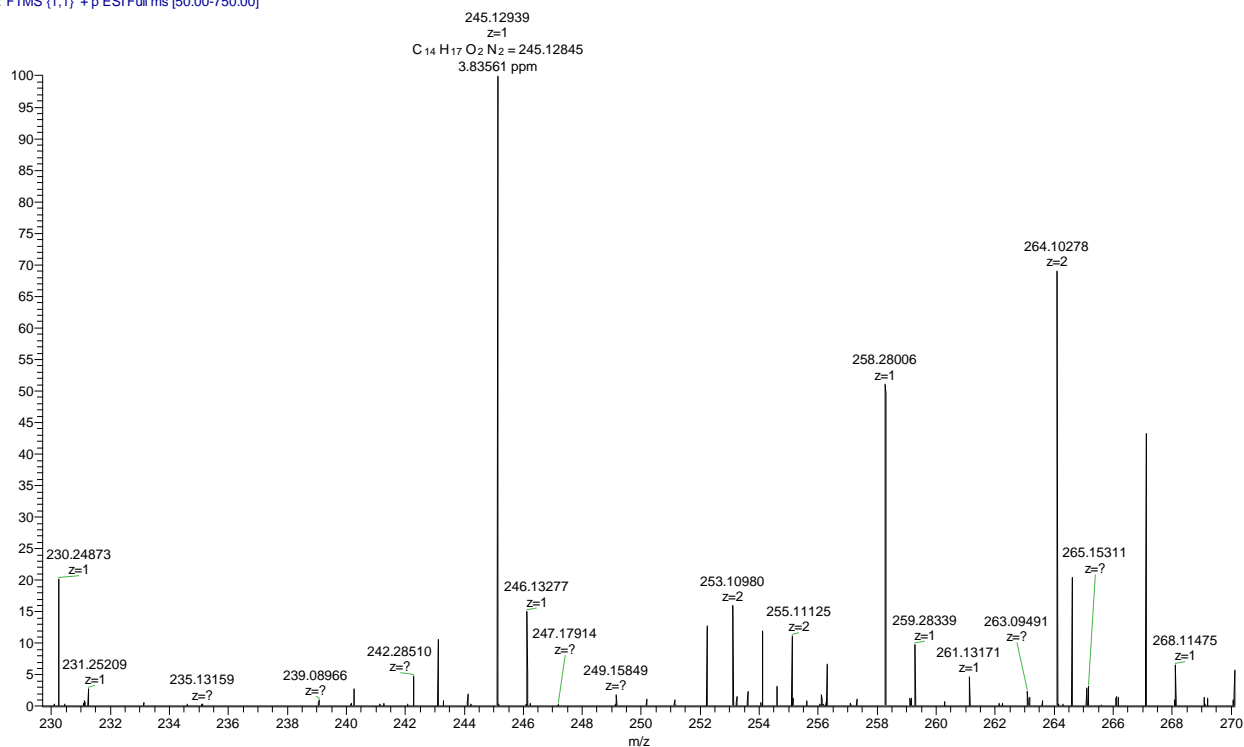

Figure S29. HR-ESI<sup>+</sup>-MS spectrum of compound 6.

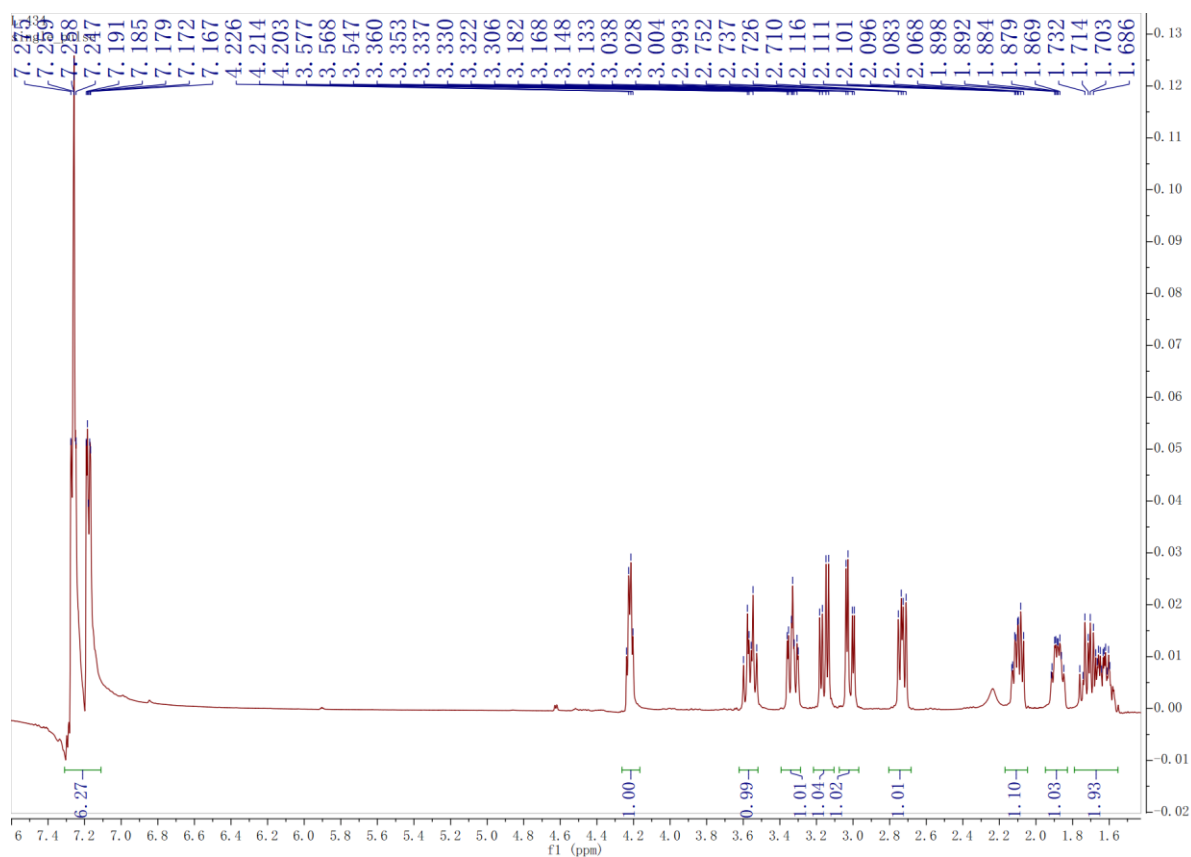

Figure S30. <sup>1</sup>H NMR spectrum of compound 7 (CDCl<sub>3</sub>).

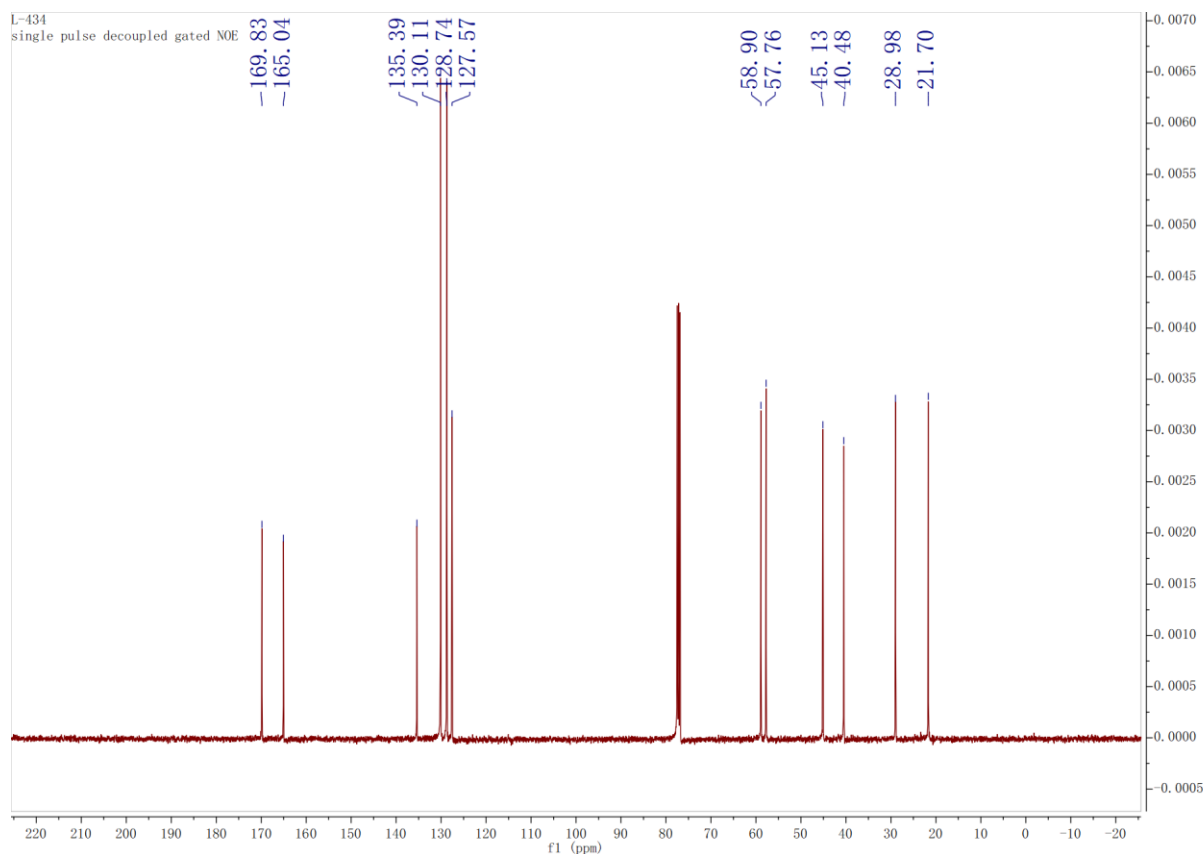

**Figure S31.**  $^{13}\text{C}$  NMR spectrum of compound **7** ( $\text{CDCl}_3$ ).

L-434 #20 RT: 0.32 AV: 1 SB: 35 0.01-0.07, 0.51-1.02 NL: 2.21E5  
T: FTMS {1,2} - p ESI Full ms [50.00-750.00]

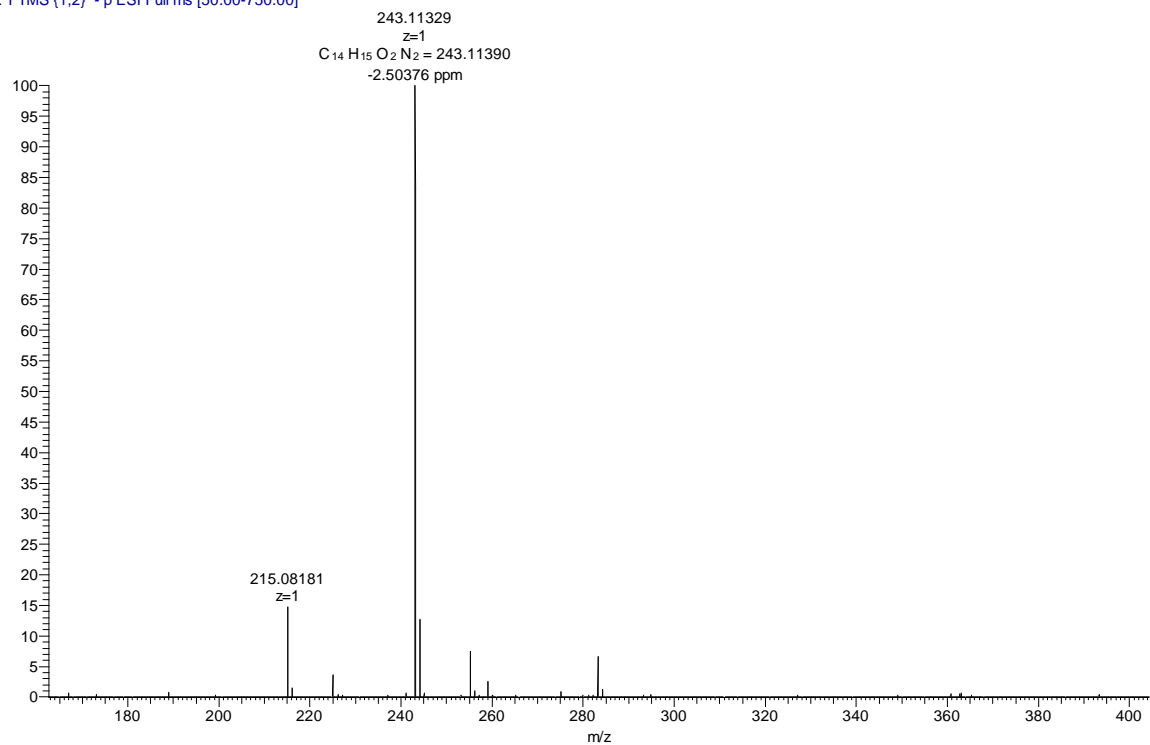

**Figure S32.** HR-ESI-MS spectrum of compound **7**.

L-434 #13 RT: 0.21 AV: 1 NL: 1.39E5  
T: FTMS (1,1) + p ESI Full ms [50.00-750.00]

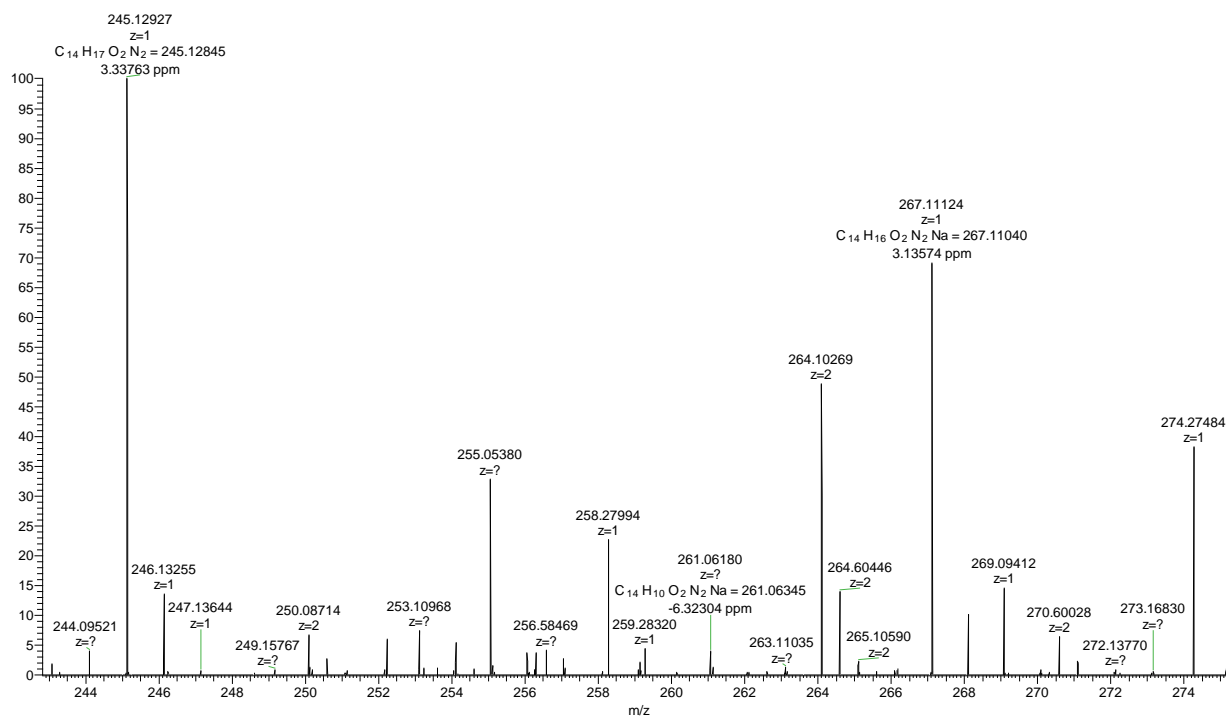

Figure S33. HR-ESI<sup>+</sup>-MS spectrum of compound 7.

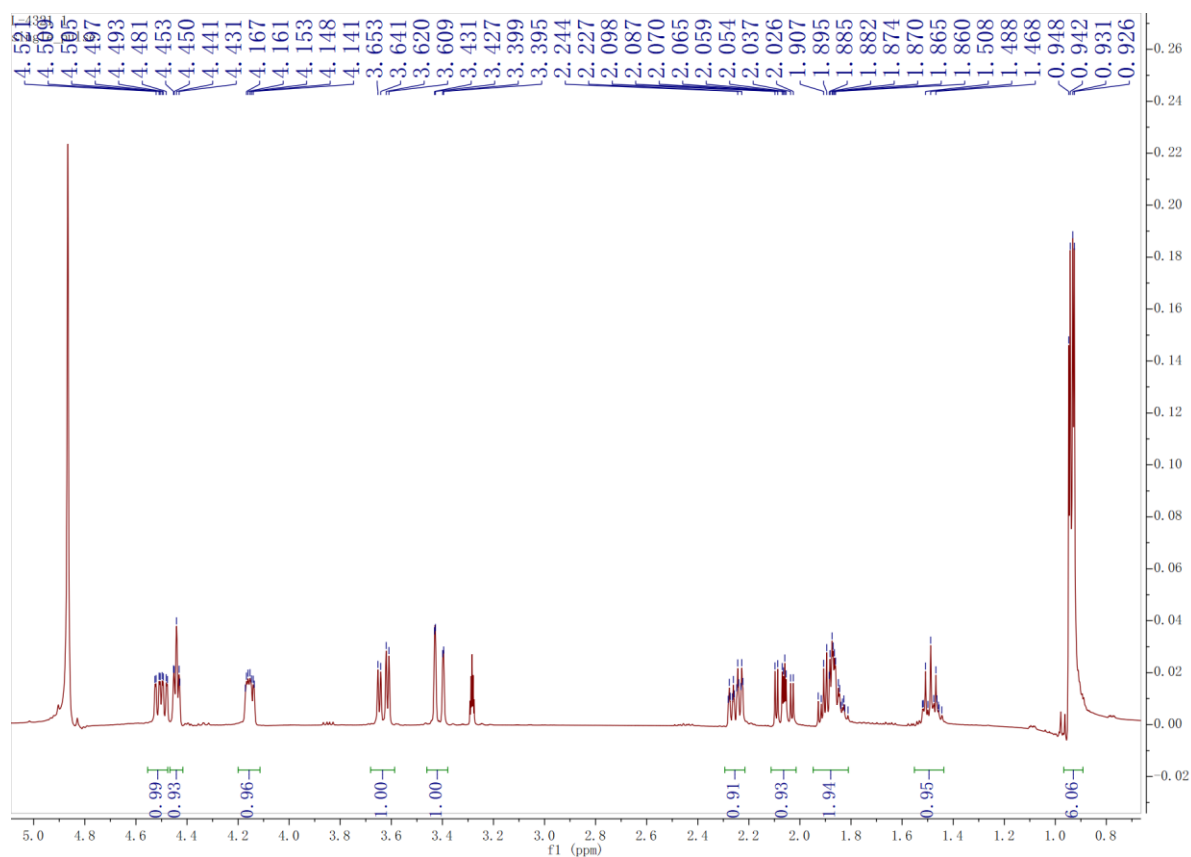

Figure S34. <sup>1</sup>H NMR spectrum of compound 8 (CD<sub>3</sub>OD).

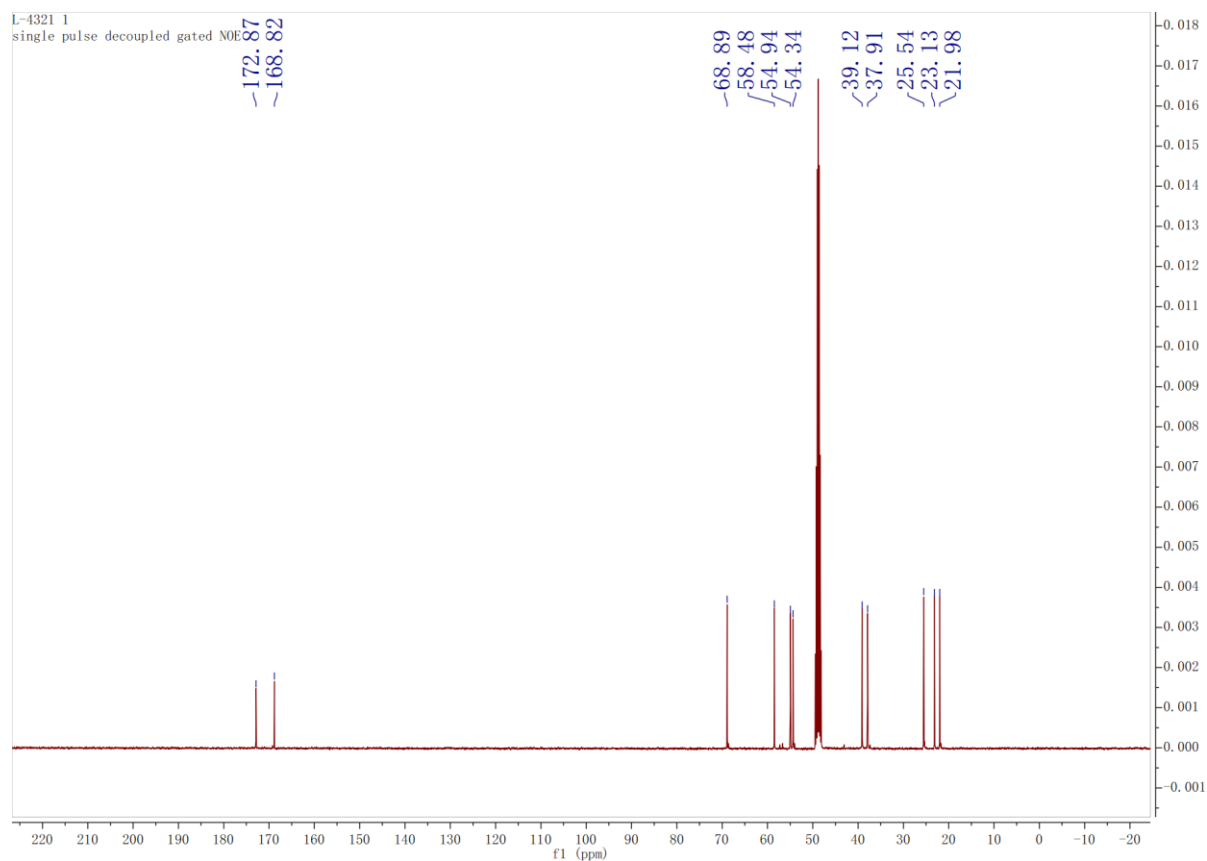

**Figure S35.**  $^{13}\text{C}$  NMR spectrum of compound **8** ( $\text{CD}_3\text{OD}$ ).

L-4321 #22 RT: 0.37 AV: 1 SB: 35 0.01-0.07, 0.52-1.03 NL: 8.15E4  
T: FTMS (1,2) - p ESI Full ms [50.00-750.00]

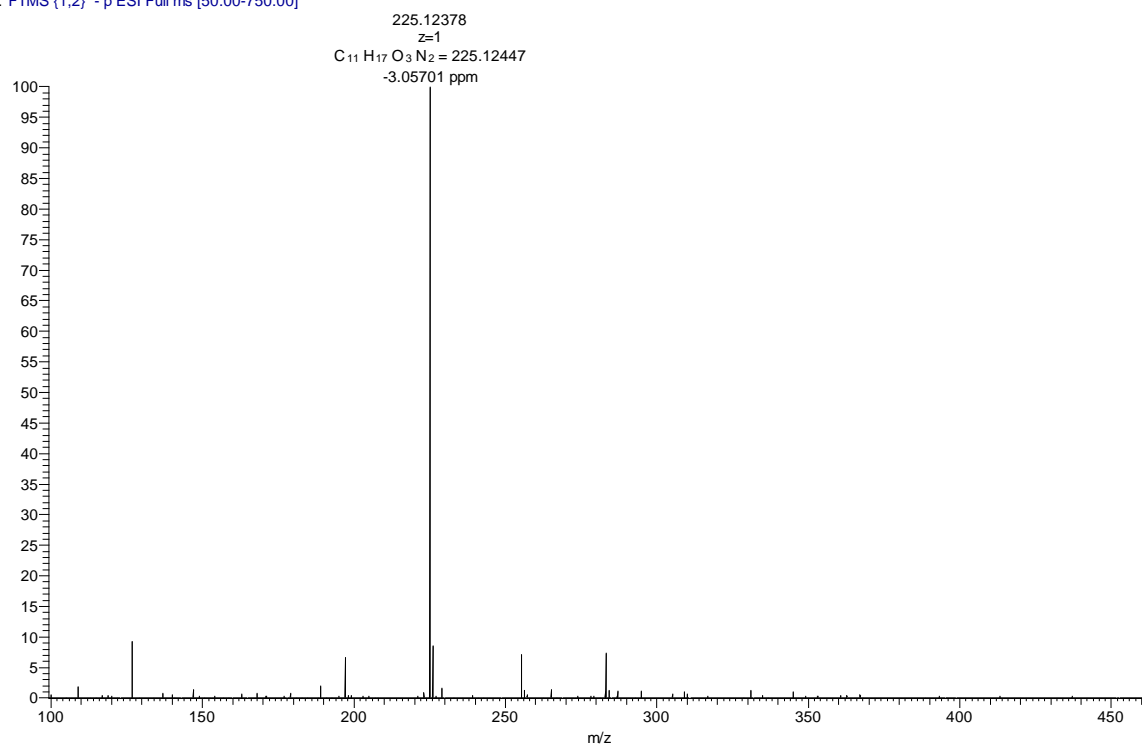

**Figure S36.** HR-ESI-MS spectrum of compound **8**.

L-4321 #11 RT: 0.18 AV: 1 NL: 4.28E4  
T: FTMS (1,1) + p ESI Full ms [50.00-750.00]

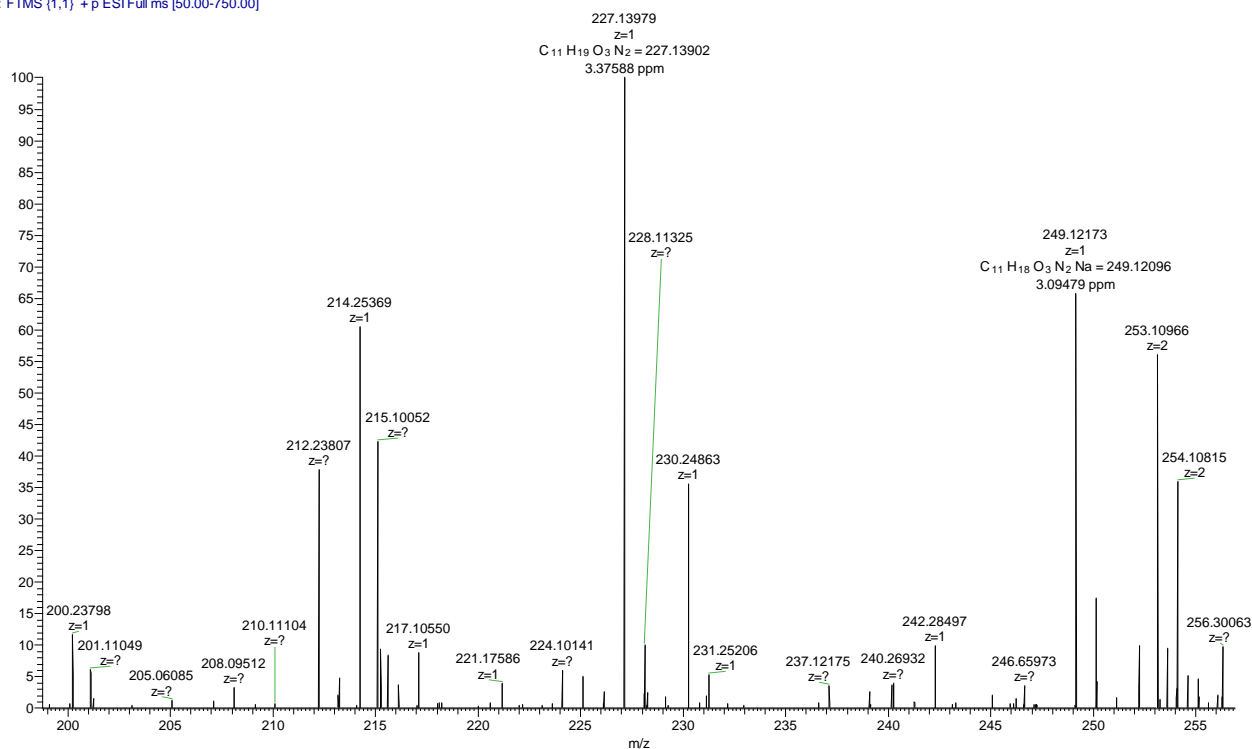

Figure S37. HR-ESI<sup>+</sup>-MS spectrum of compound 8.

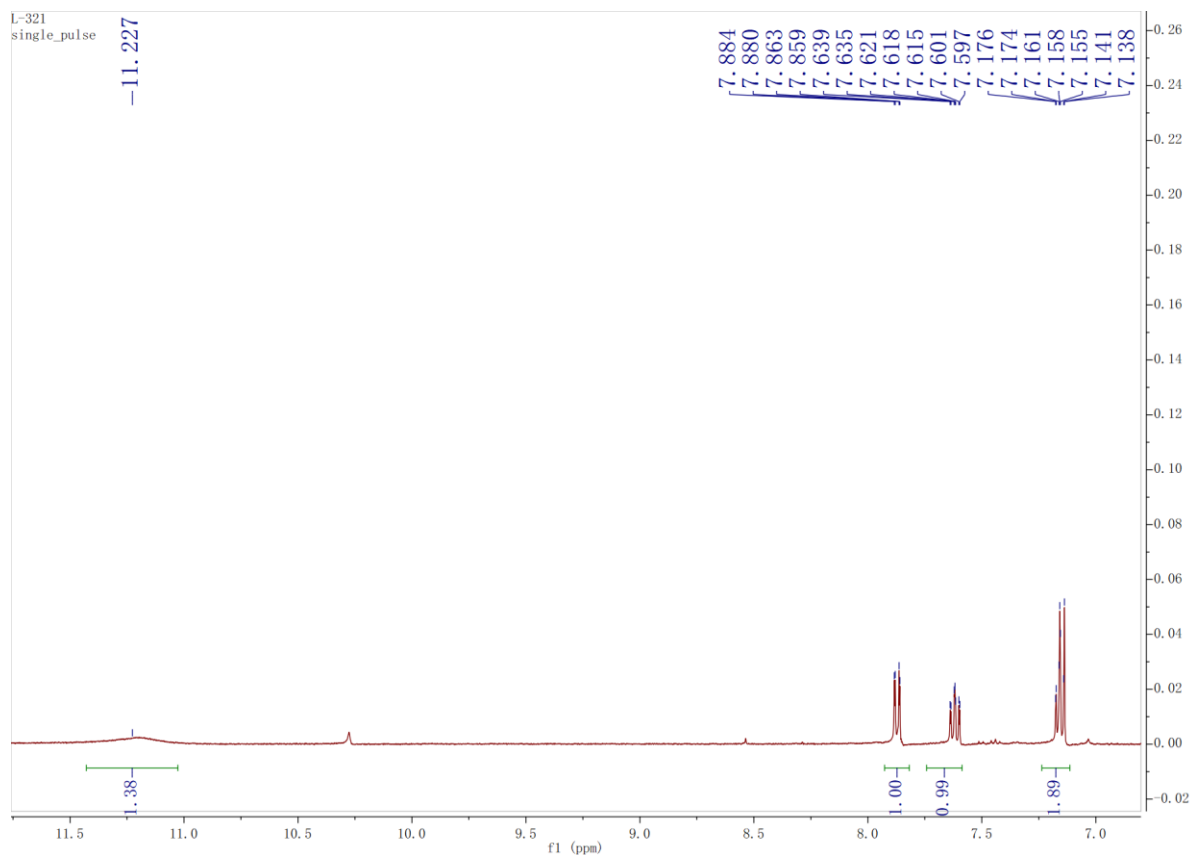

Figure S38. <sup>1</sup>H NMR spectrum of compound 9 (DMSO-*d*<sub>6</sub>).

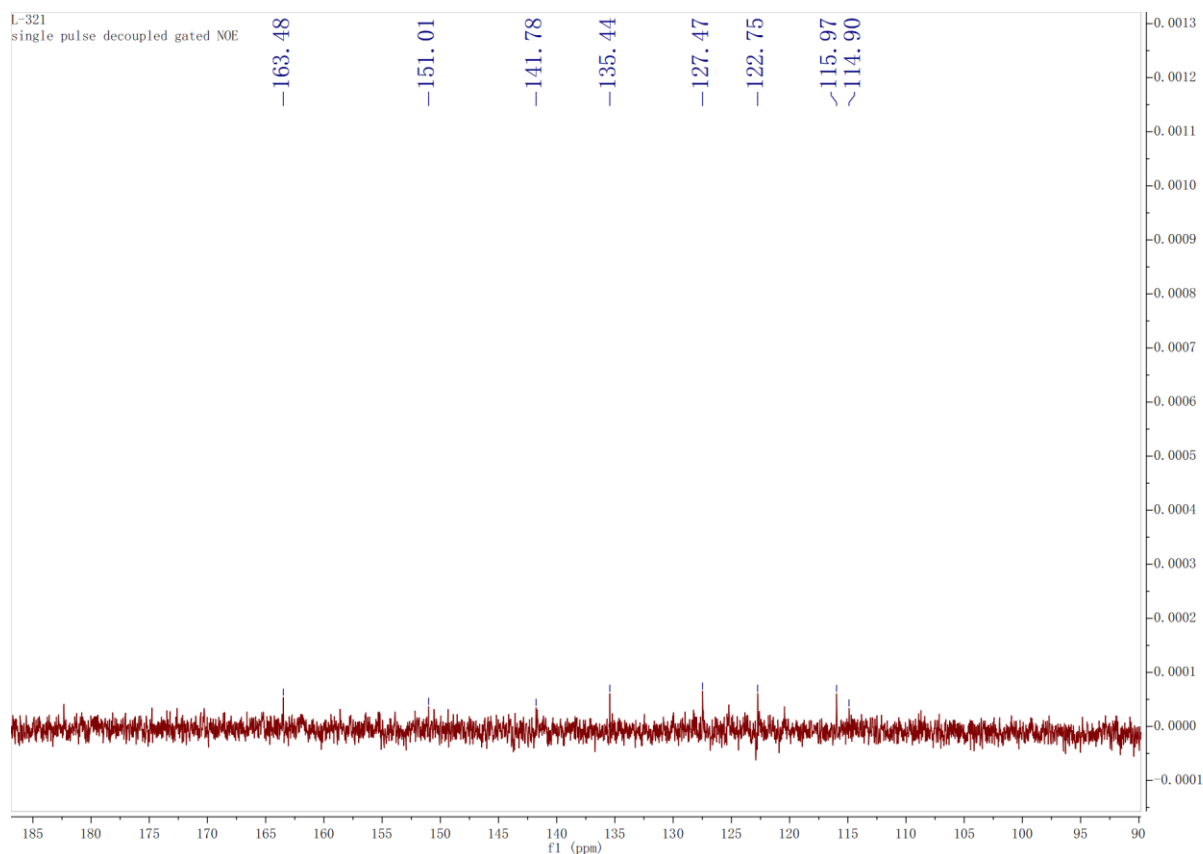

**Figure S39.**  $^{13}\text{C}$  NMR spectrum of compound **9** ( $\text{DMSO}-d_6$ ).

L-321 #10 RT: 0.16 AV: 1 SB: 35 0.01-0.07 , 0.52-1.03 NL: 1.17E4  
T: FTMS {1,2} - p ESI Full ms [50.00-750.00]

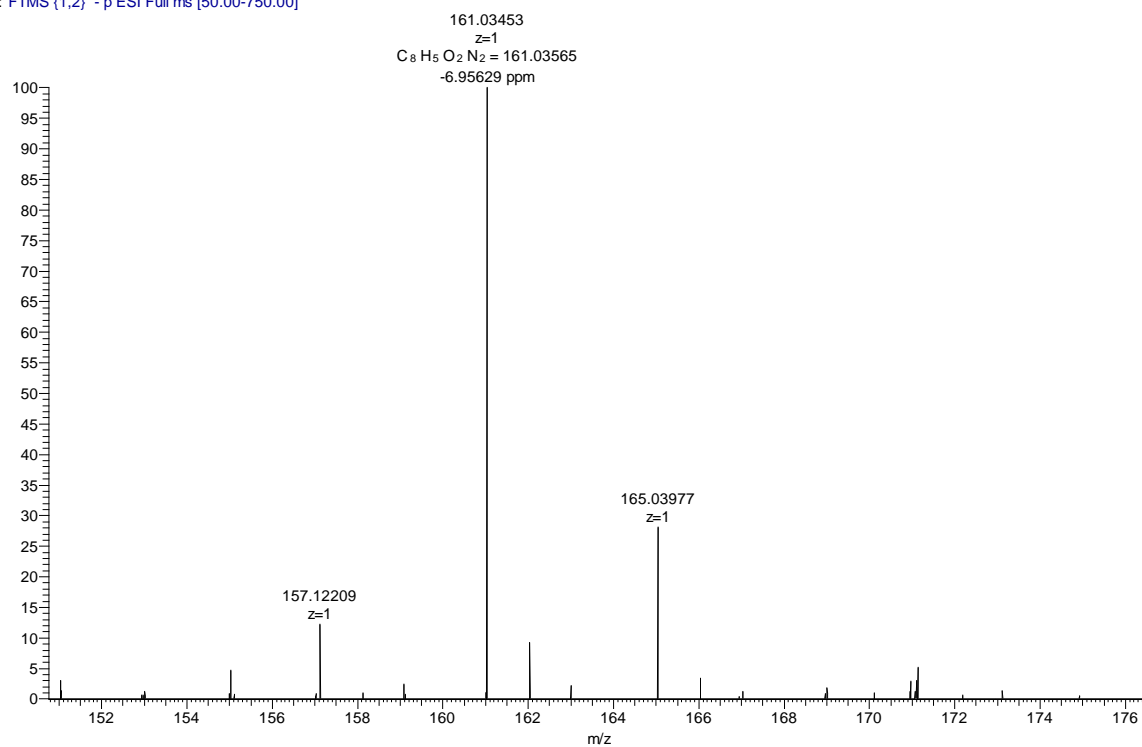

**Figure S40.** HR-ESI-MS spectrum of compound **9**.

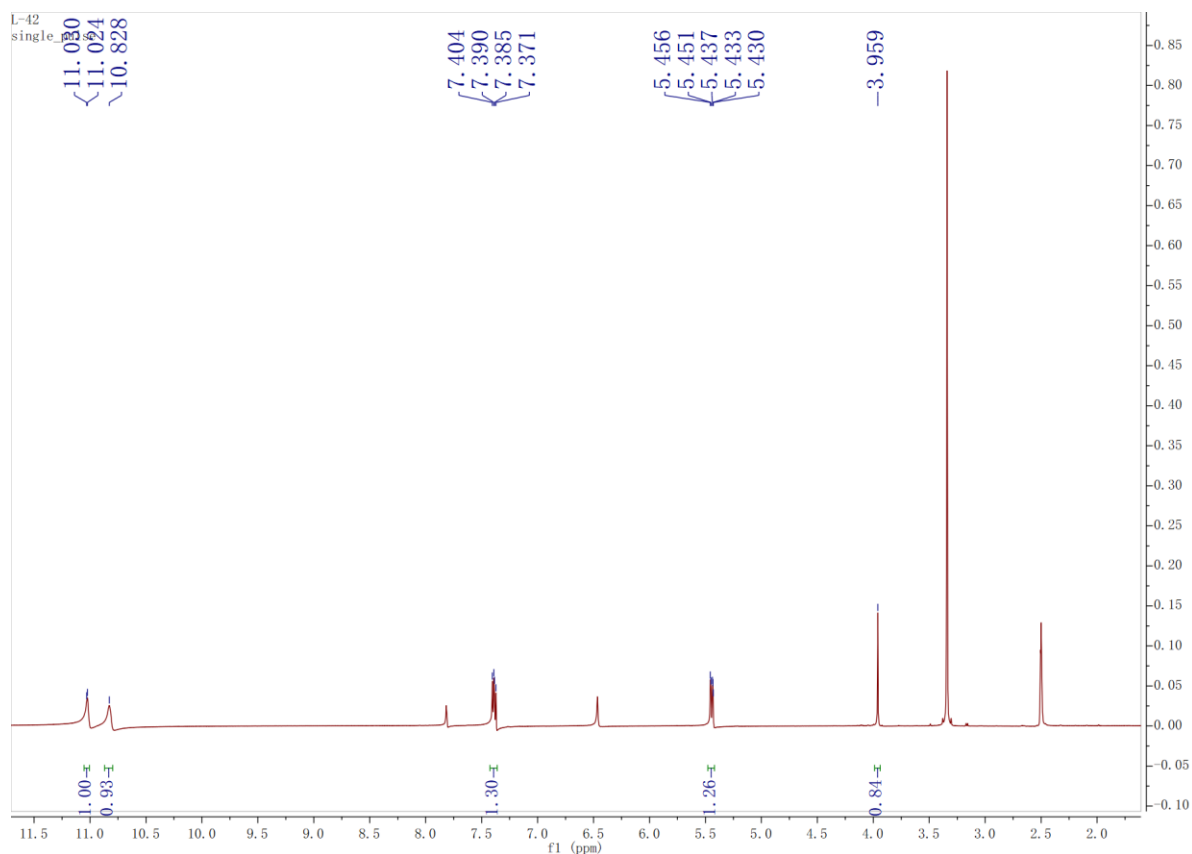

**Figure S41.** <sup>1</sup>H NMR spectrum of compound **10** (DMSO-*d*<sub>6</sub>).

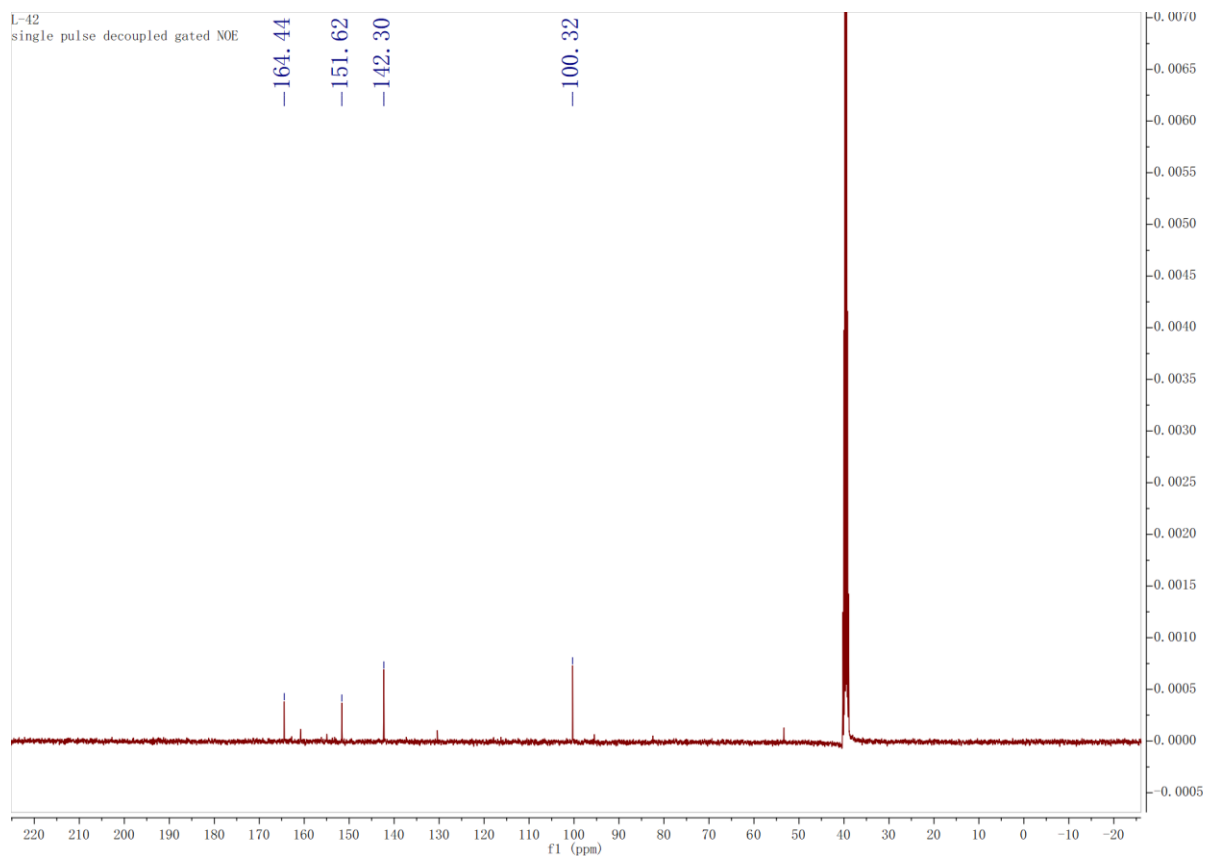

**Figure S42.** <sup>13</sup>C NMR spectrum of compound **10** (DMSO-*d*<sub>6</sub>).

L-421 #10 RT: 0.16 AV: 1 SB: 35 0.01-0.07, 0.52-1.02 NL: 1.53E5  
T: FTMS (1,2) - p ESI Full ms [50.00-750.00]

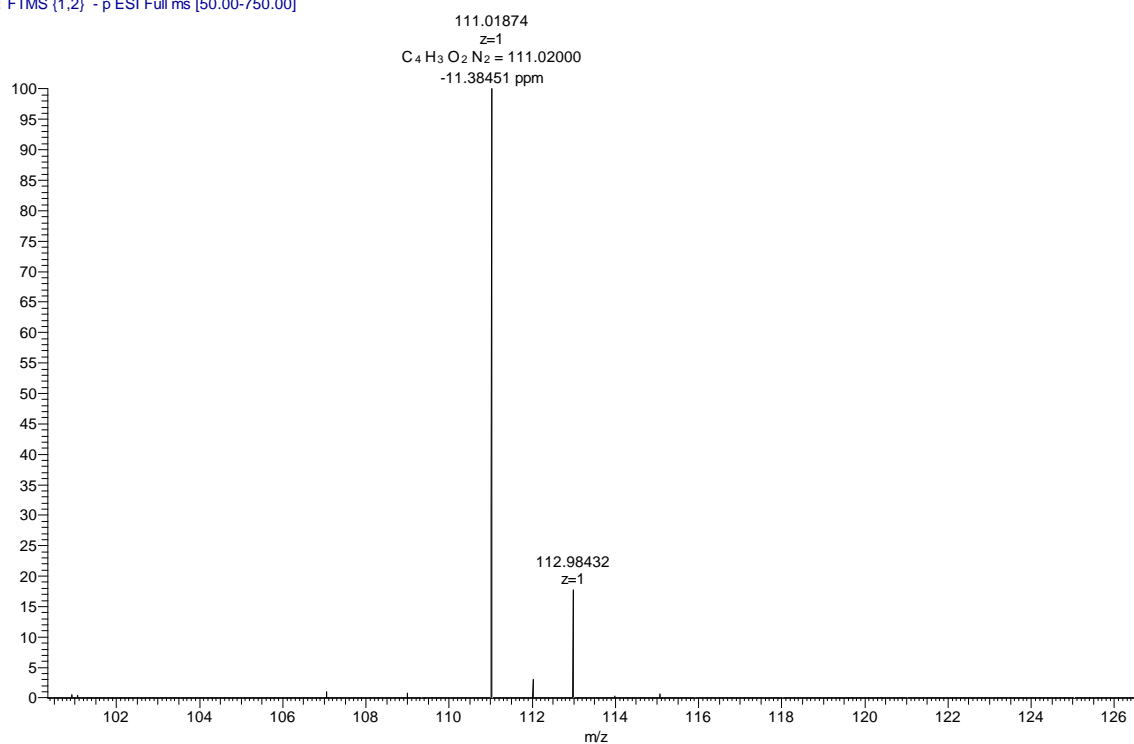

Figure S43. HR-ESI<sup>-</sup>-MS spectrum of compound 10.

L-421 #11 RT: 0.18 AV: 1 NL: 5.82E3  
T: FTMS (1,1) + p ESI Full ms [50.00-750.00]

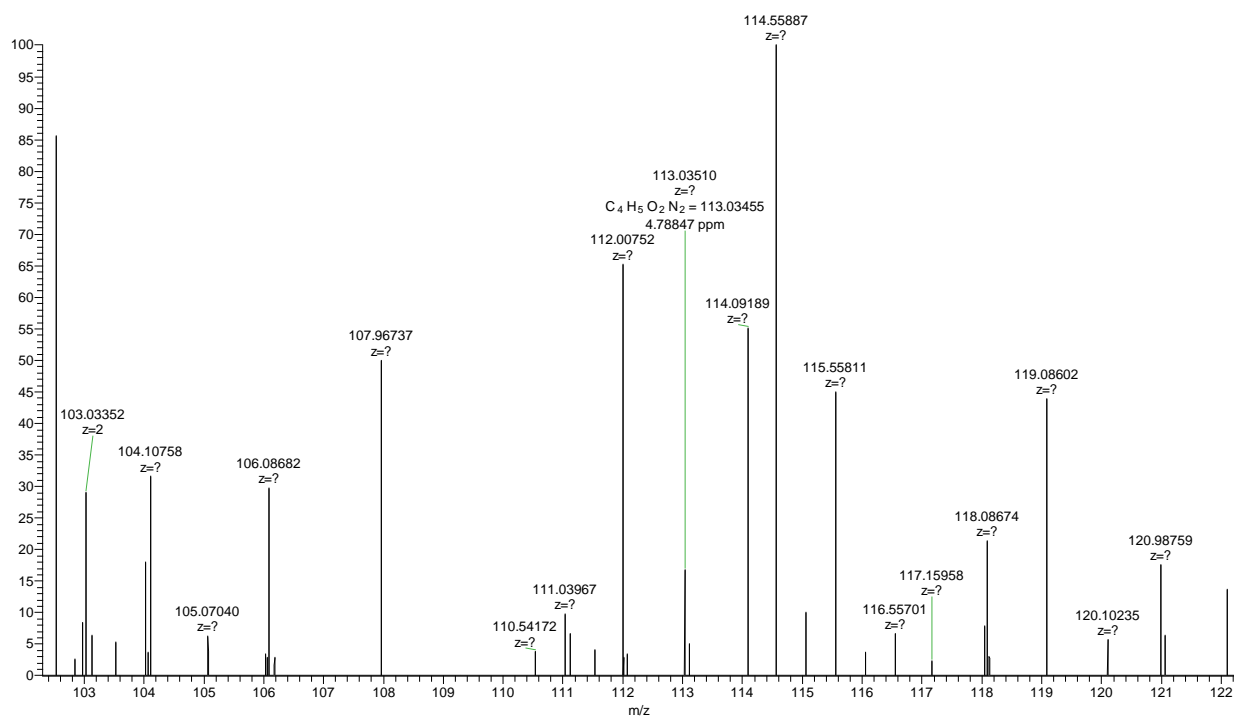

Figure S44. HR-ESI<sup>+</sup>-MS spectrum of compound 10.



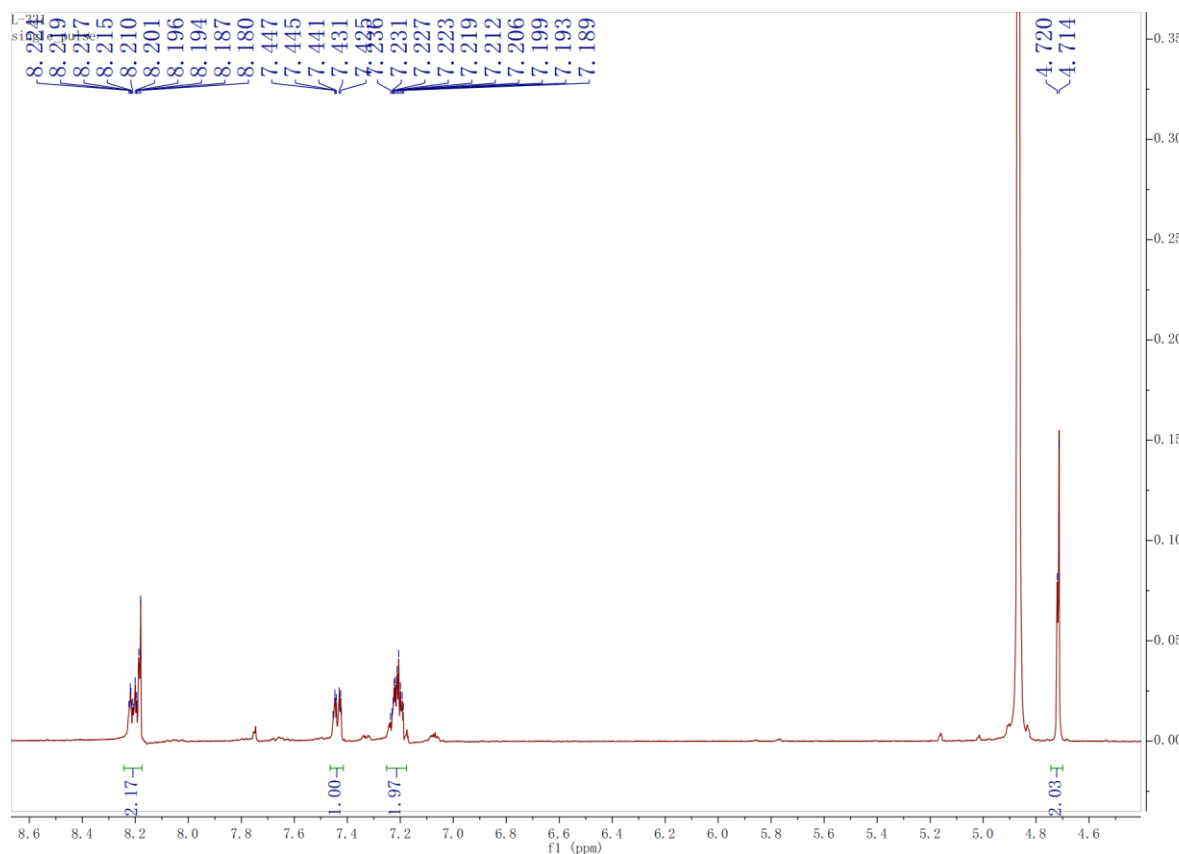

**Figure S45.** <sup>1</sup>H NMR spectrum of compound **11** (CD<sub>3</sub>OD).

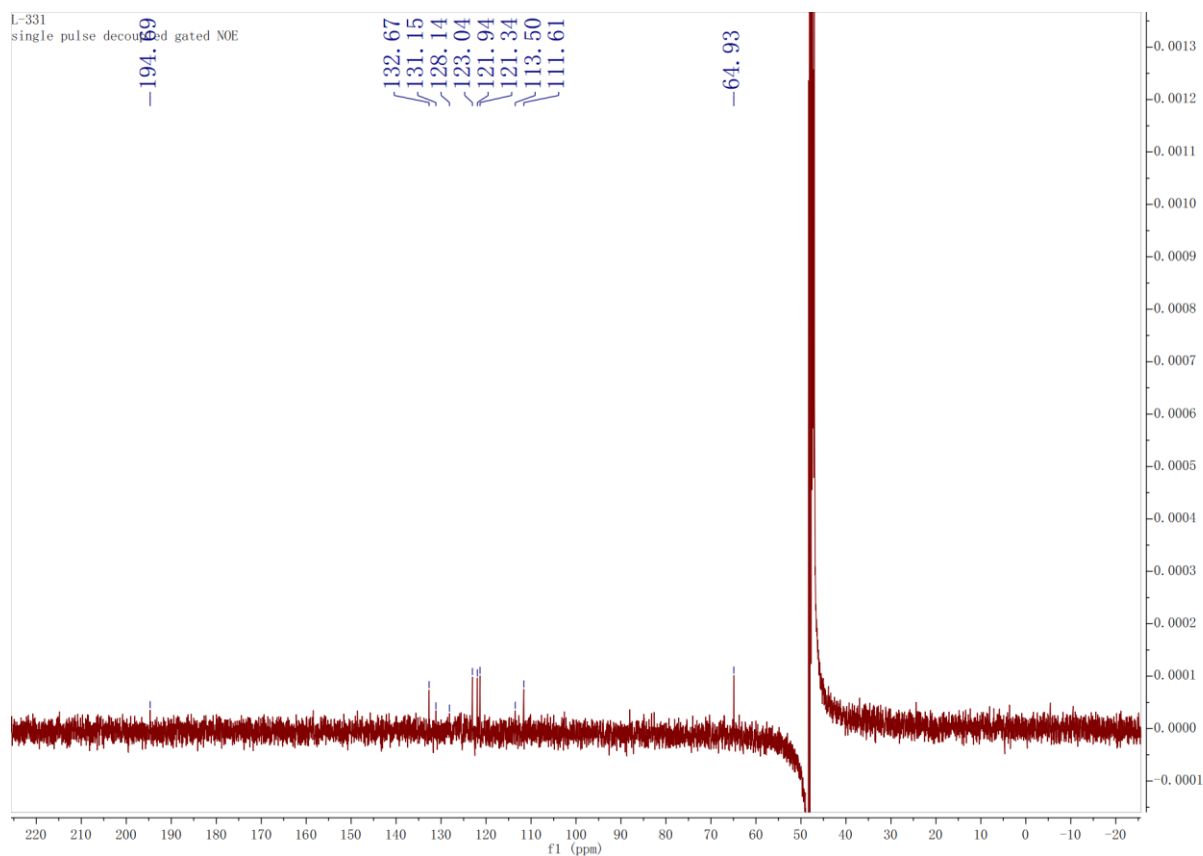

**Figure S46.** <sup>13</sup>C NMR spectrum of compound **11** (CD<sub>3</sub>OD).

L-331\_230109152052 #5 RT: 0.06 AV: 1 NL: 6.93E6  
T: FTMS {1,1} + p APCI corona Full ms [50.00-500.00]

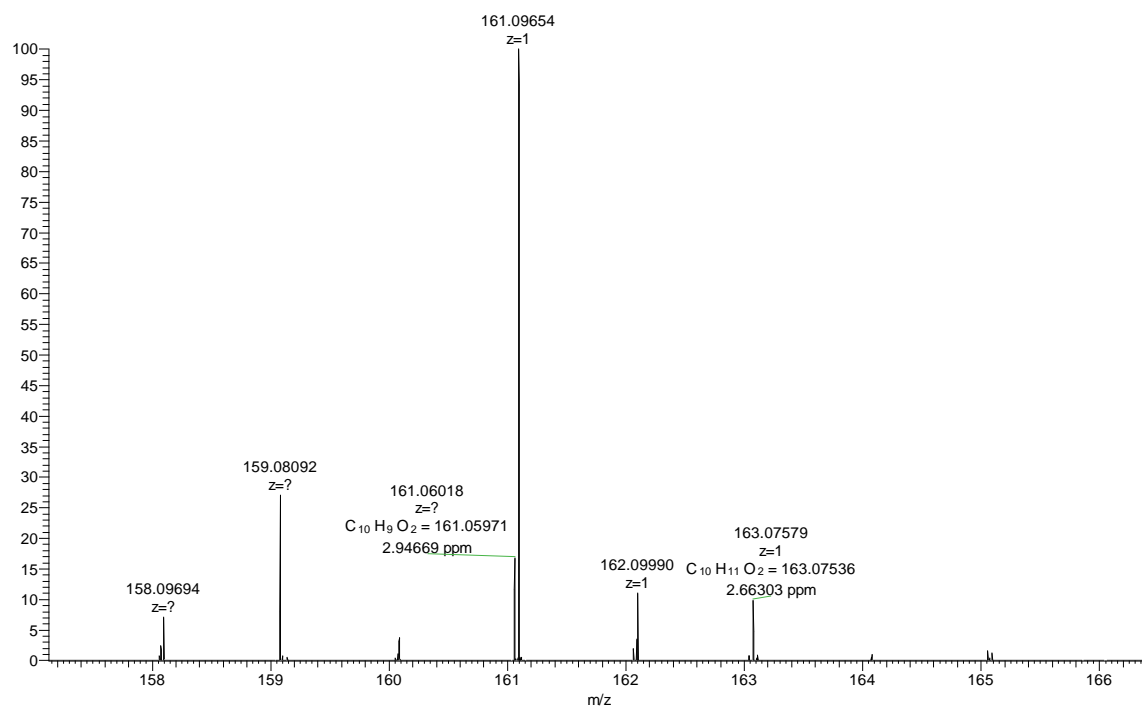

Figure S47. HR-APCI-MS spectrum of compound 11.

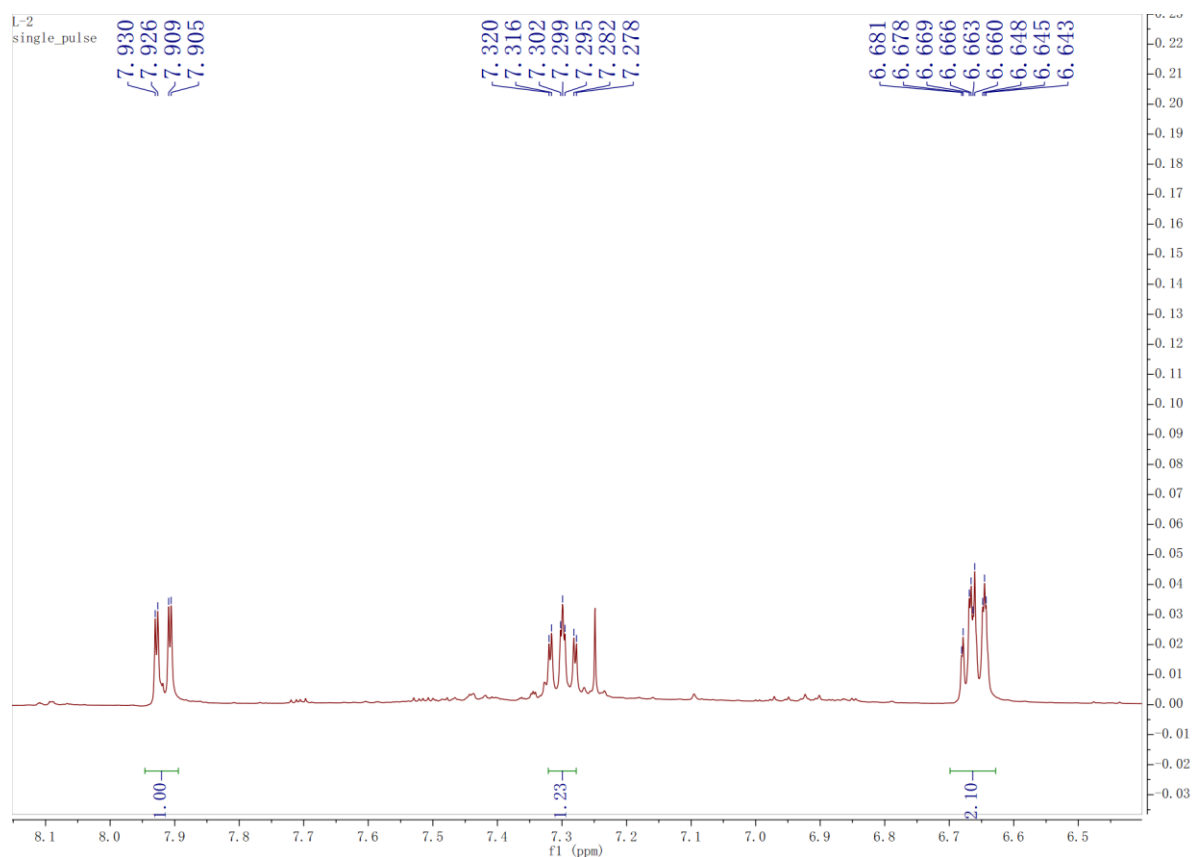

Figure S48. <sup>1</sup>H NMR spectrum of compound 12 (CDCl<sub>3</sub>).

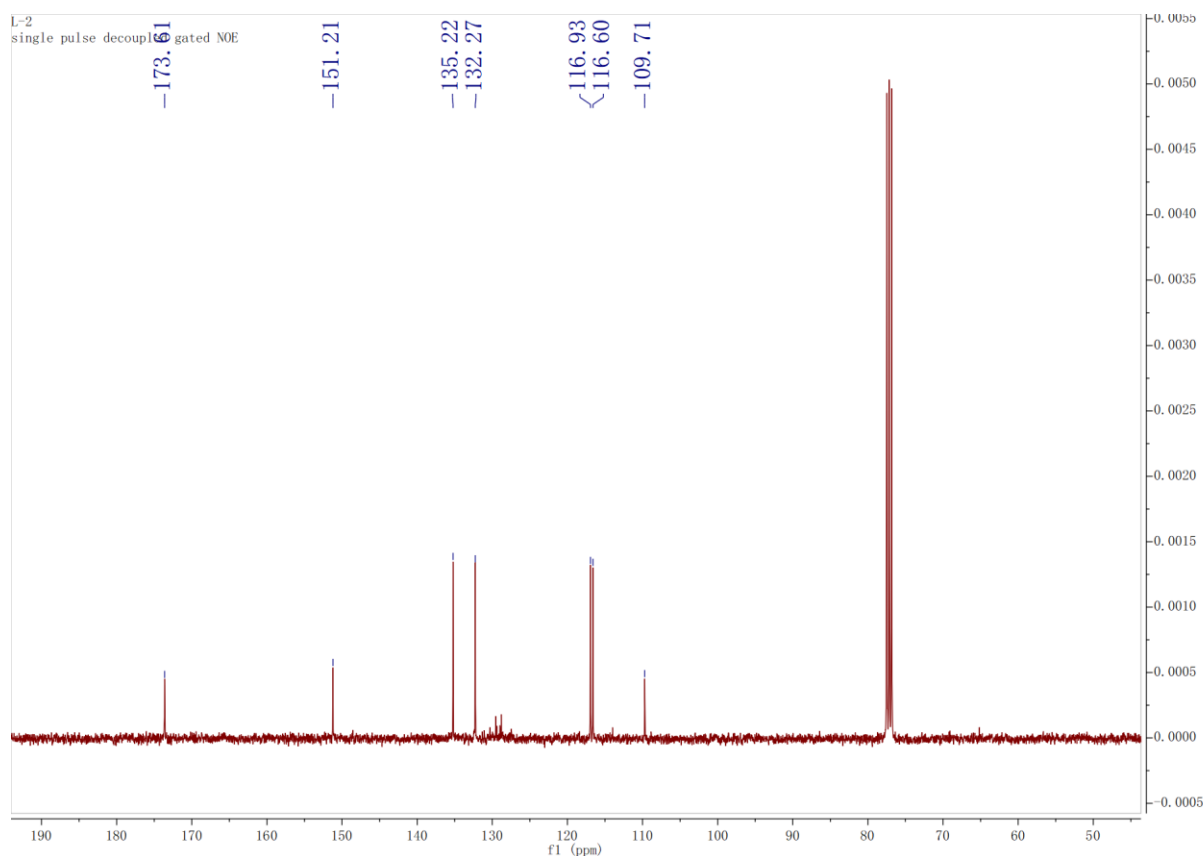

**Figure S49.**  $^{13}\text{C}$  NMR spectrum of compound **12** ( $\text{CDCl}_3$ ).

L-2 #26 RT: 0.43 AV: 1 SB: 35 0.01-0.07, 0.52-1.02 NL: 3.27E4  
T: FTMS {1,2} - p ESI Full ms [50.00-750.00]

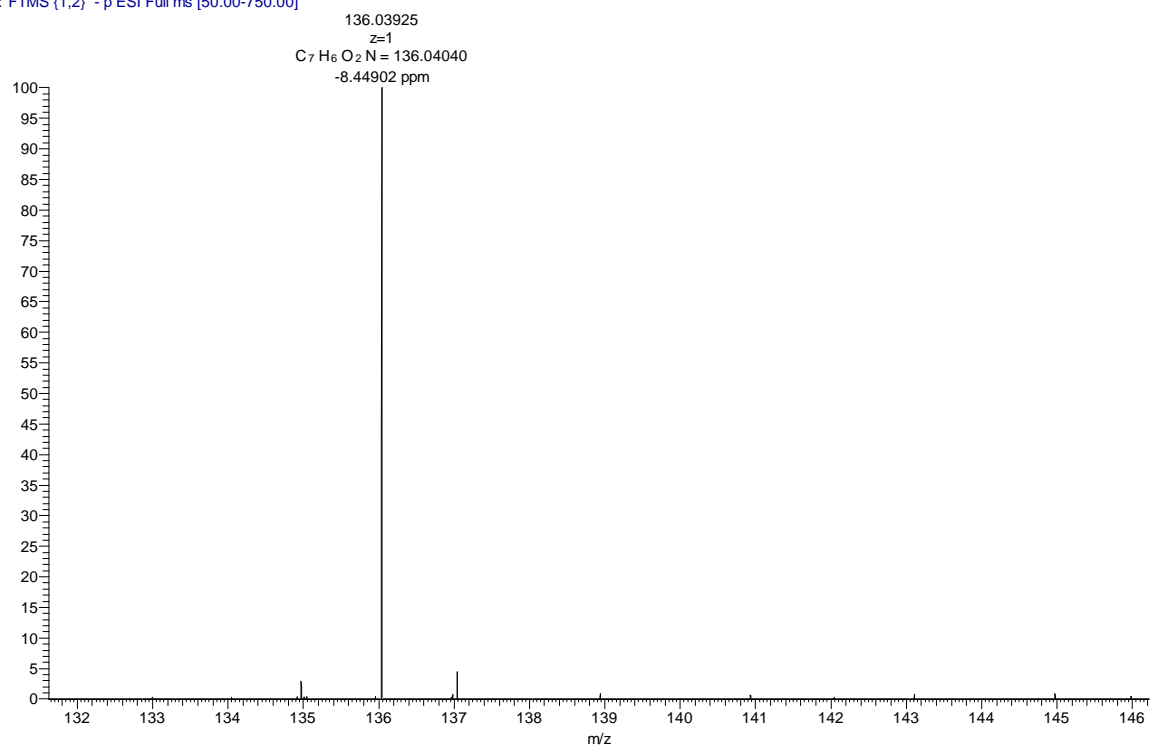

**Figure S50.** HR-ESI-MS spectrum of compound **12**.

L-2 #11 RT: 0.18 AV: 1 NL: 1.32E4  
T: FTMS (1,1) + p ESI Full ms [50.00-750.00]

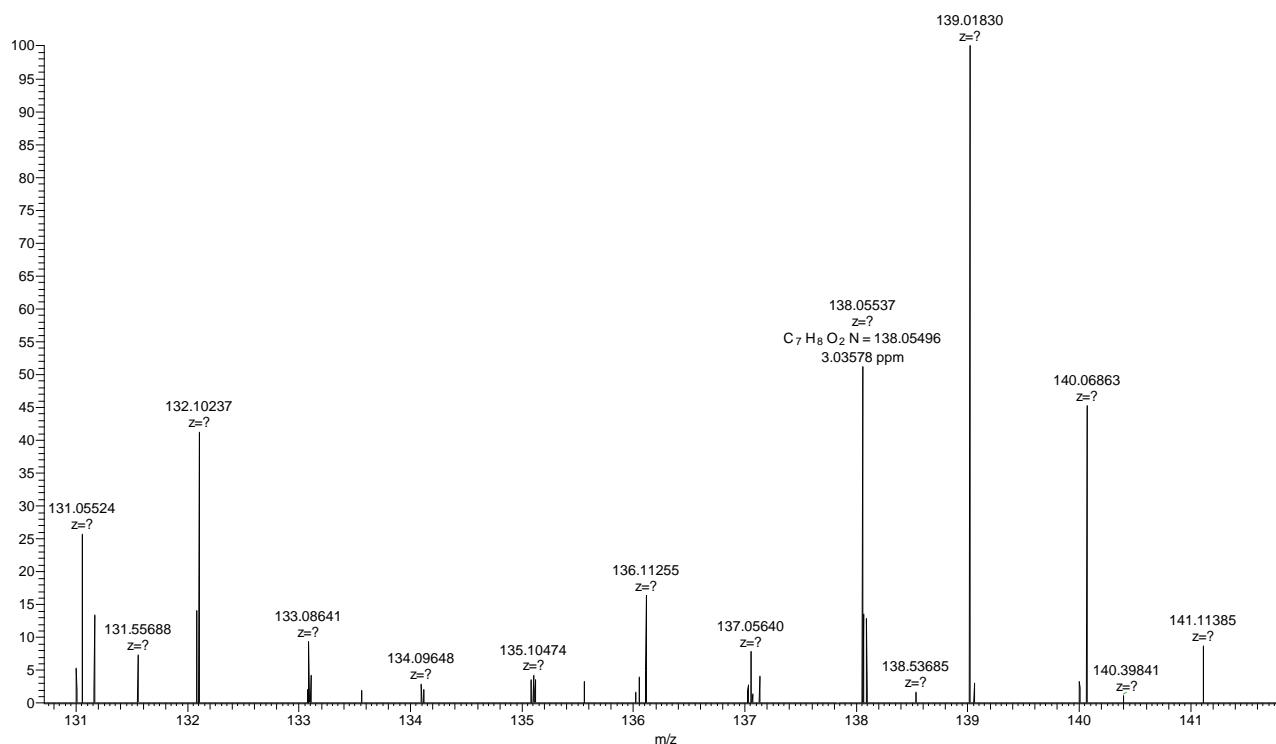

Figure S51. HR-ESI<sup>+</sup>-MS spectrum of compound 12.

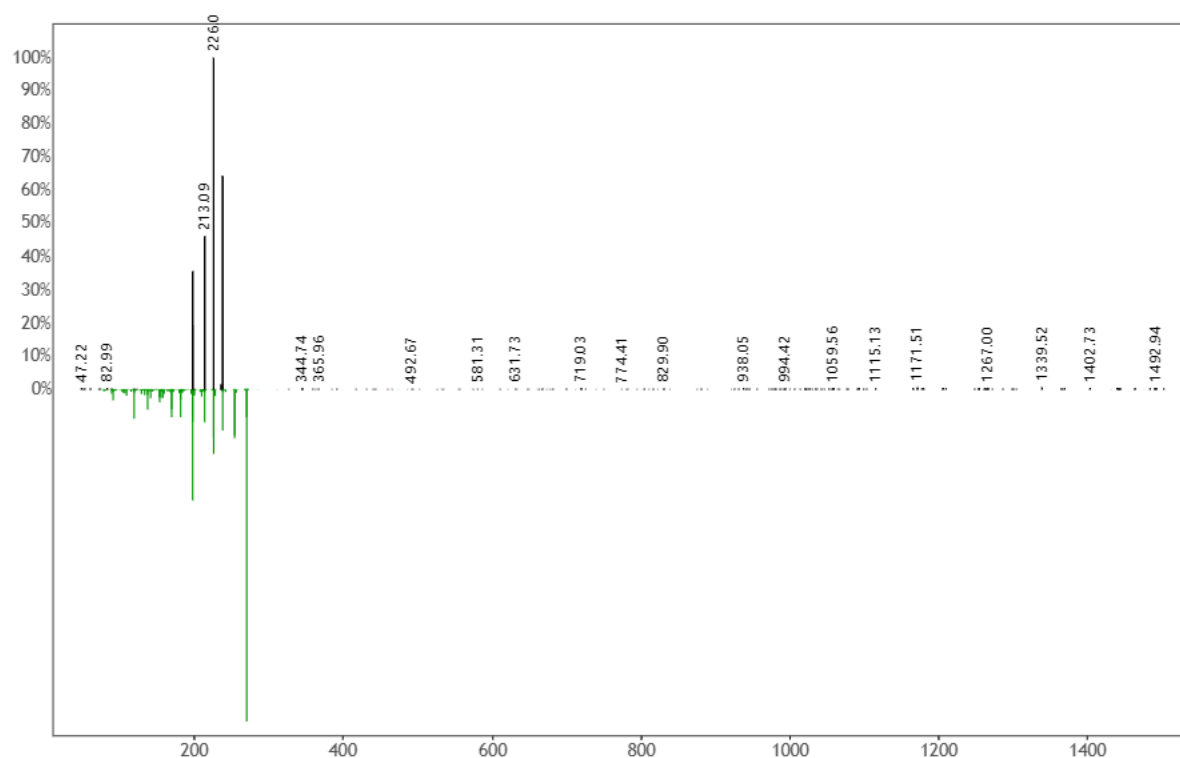

Figure S52. MS/MS spectrum of compound a (black) compared with GNPS library spectrum (green).

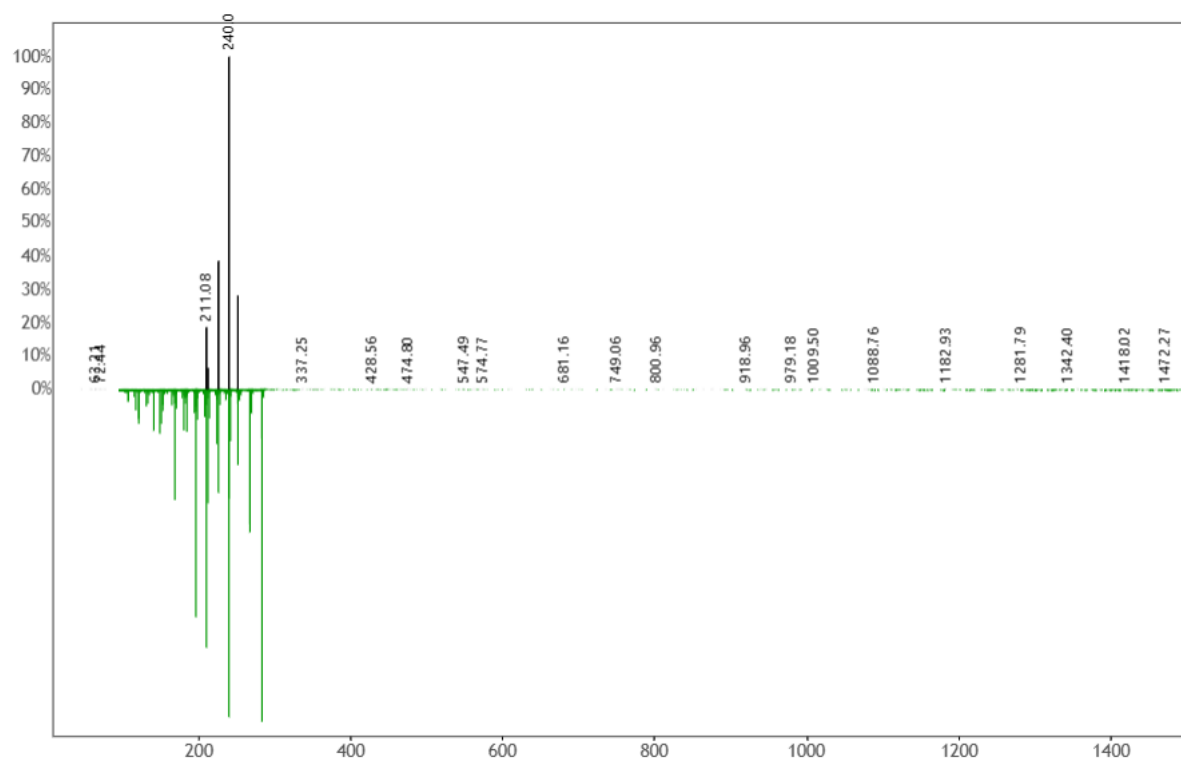

**Figure S53.** MS/MS spectrum of compound **b** (black) compared with GNPS library spectrum (green).

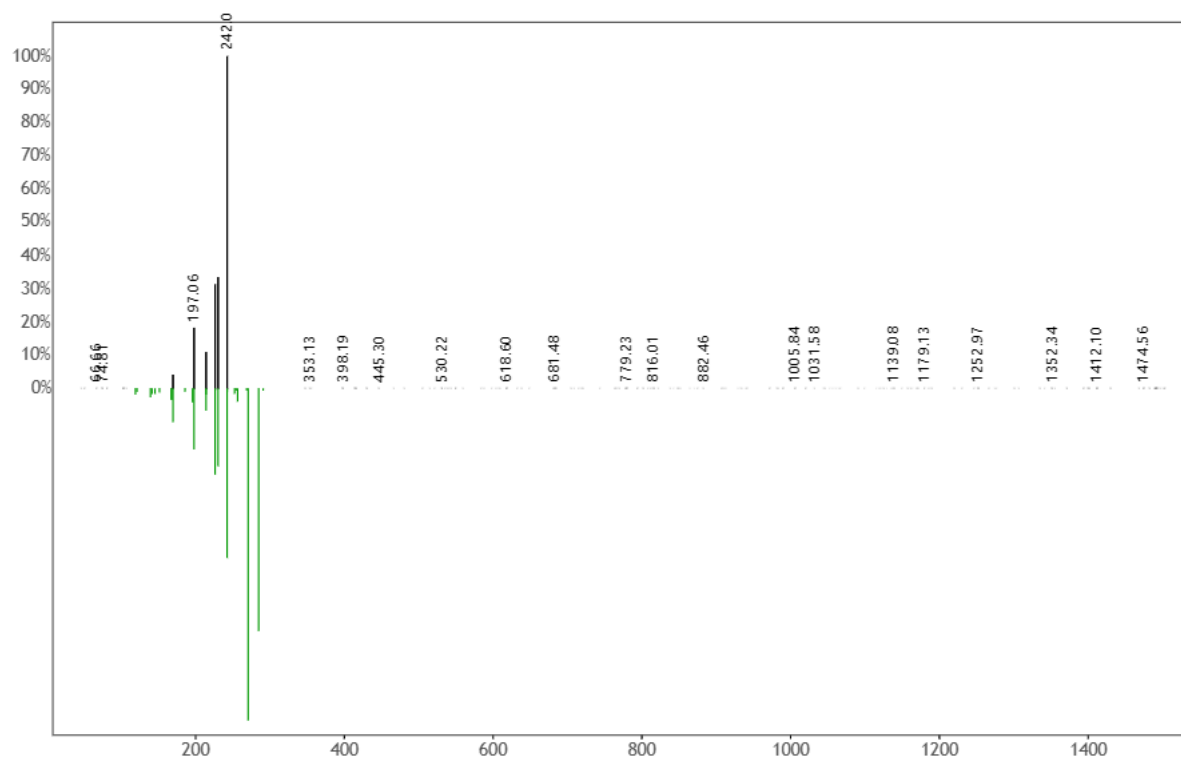

**Figure S54.** MS/MS spectrum of compound **c** (black) compared with GNPS library spectrum (green).

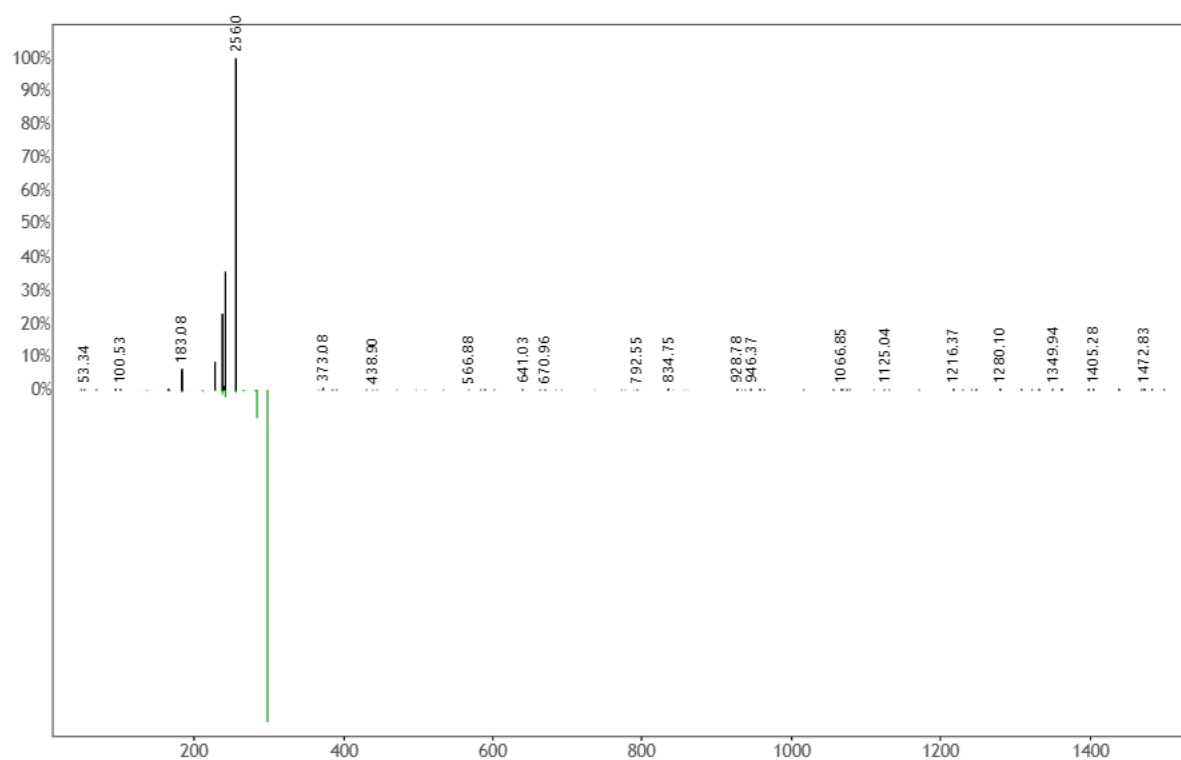

**Figure S55.** MS/MS spectrum of compound **d** (black) compared with GNPS library spectrum (green).

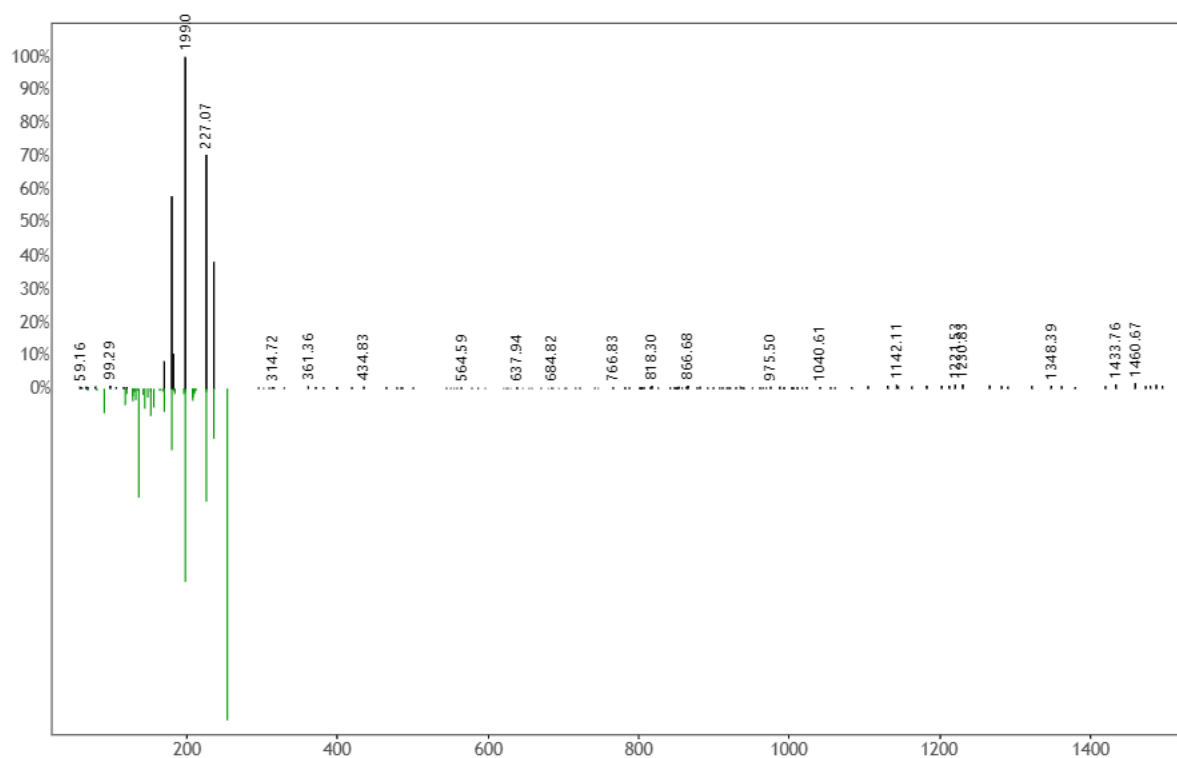

**Figure S56.** MS/MS spectrum of compound **e** (black) compared with GNPS library spectrum (green).

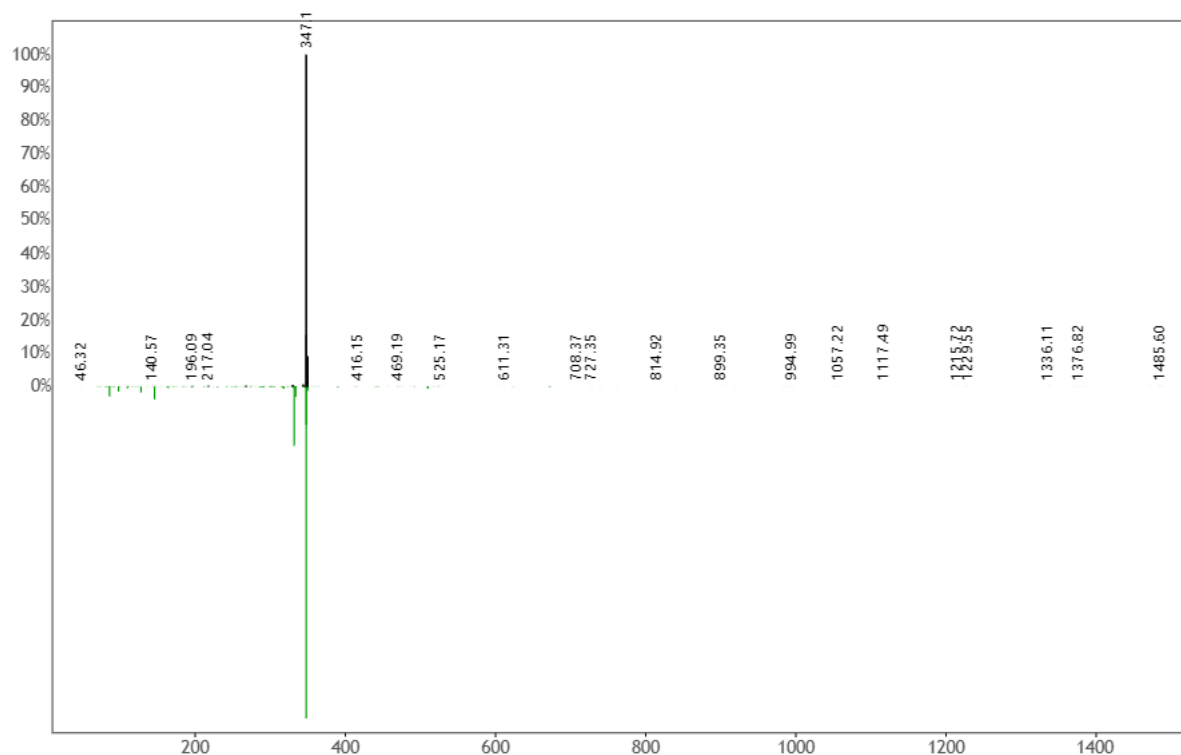

**Figure S57.** MS/MS spectrum of compound **f** (black) compared with GNPS library spectrum (green).

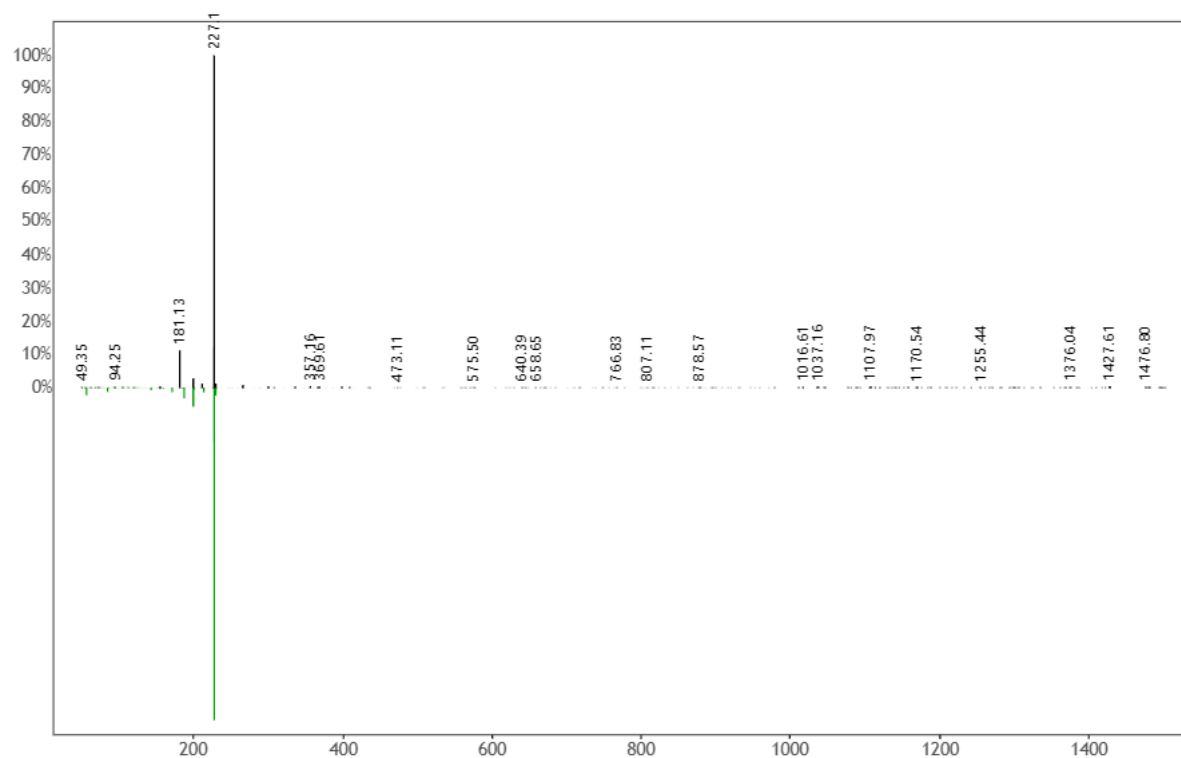

**Figure S58.** MS/MS spectrum of compound **g** (black) compared with GNPS library spectrum (green).

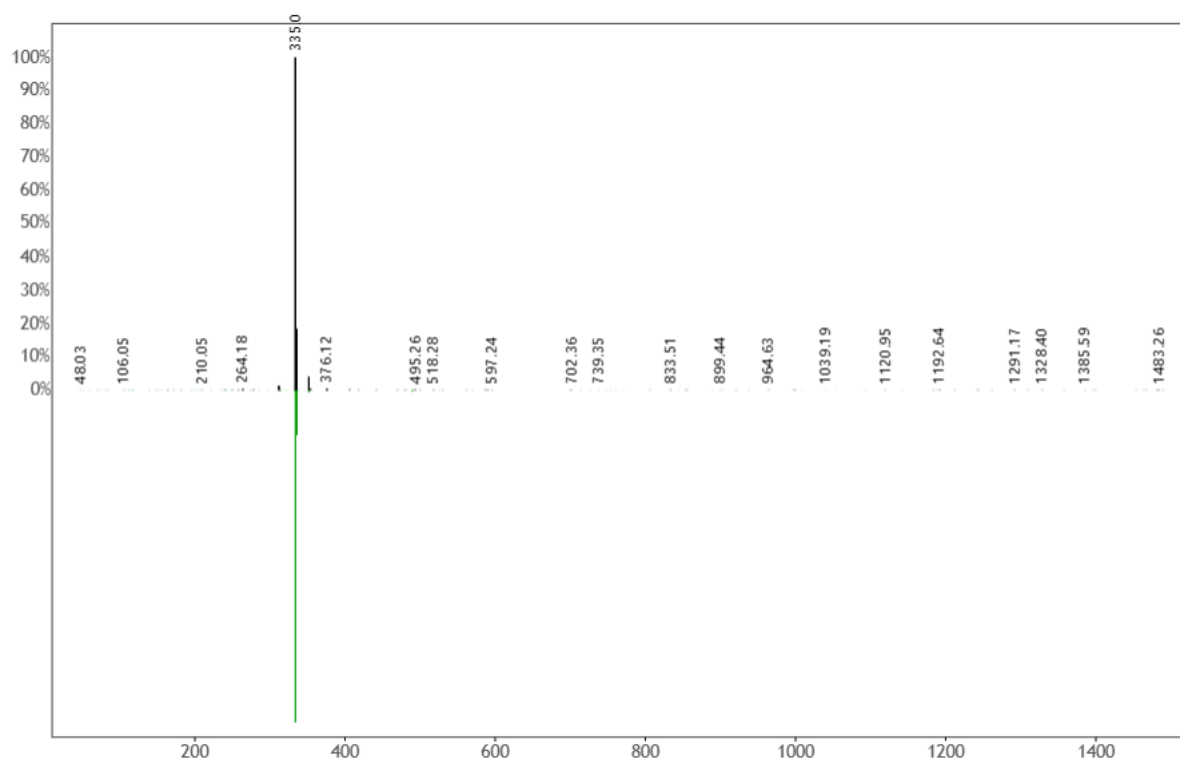

**Figure S59.** MS/MS spectrum of compound **h** (black) compared with GNPS library spectrum (green).

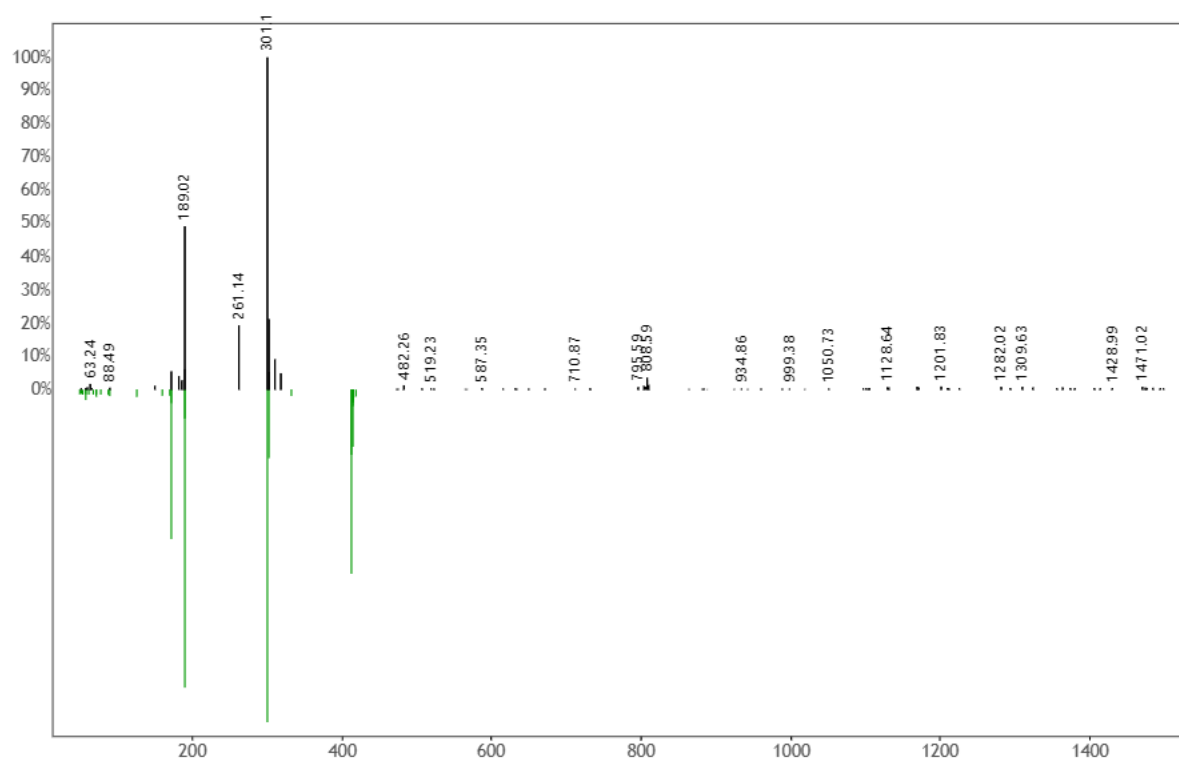

**Figure S60.** MS/MS spectrum of compound **i** (black) compared with GNPS library spectrum (green).



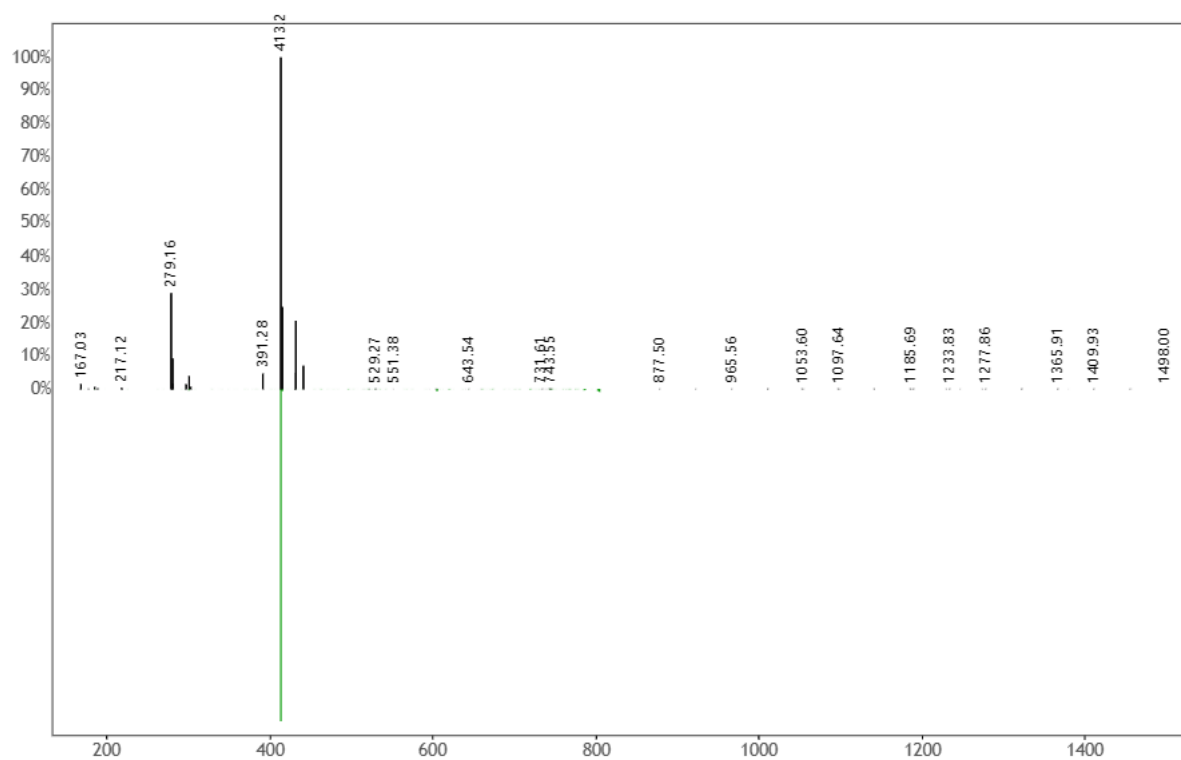

**Figure S61.** MS/MS spectrum of compound **j** (black) compared with GNPS library spectrum (green).

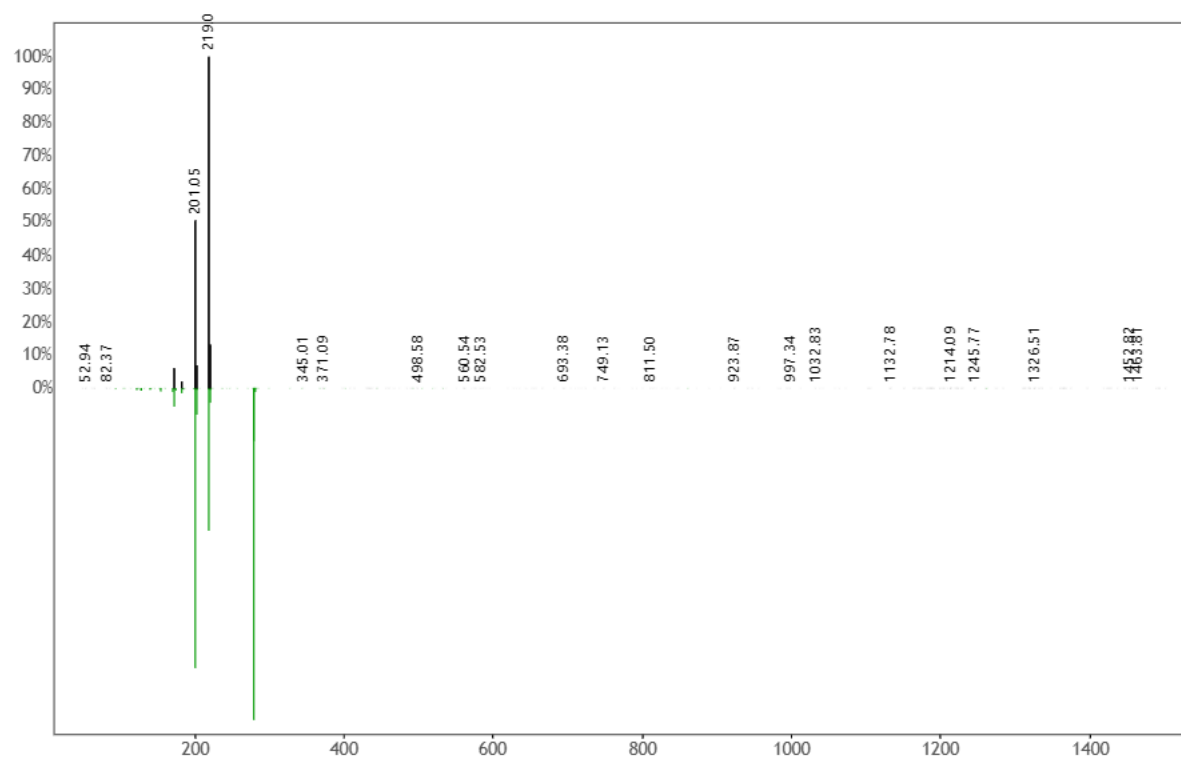

**Figure S62.** MS/MS spectrum of compound **k** (black) compared with GNPS library spectrum (green).

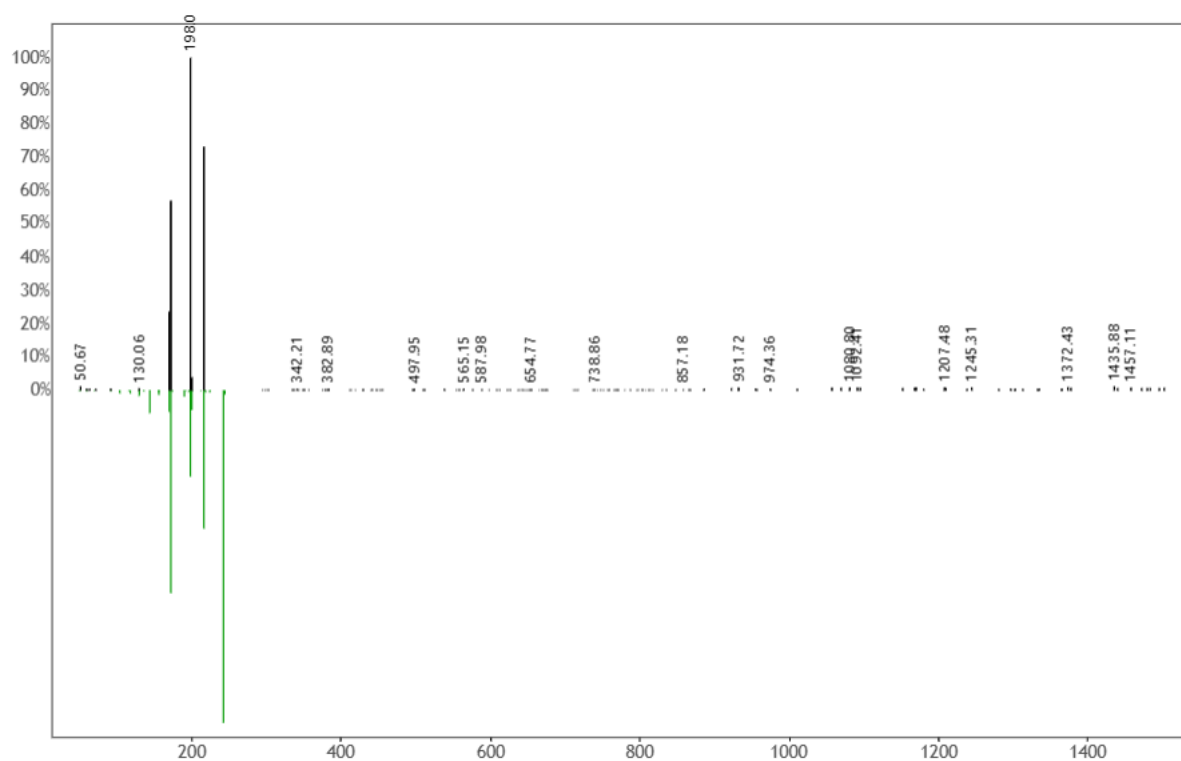

**Figure S63.** MS/MS spectrum of compound **1** (black) compared with GNPS library spectrum (green).

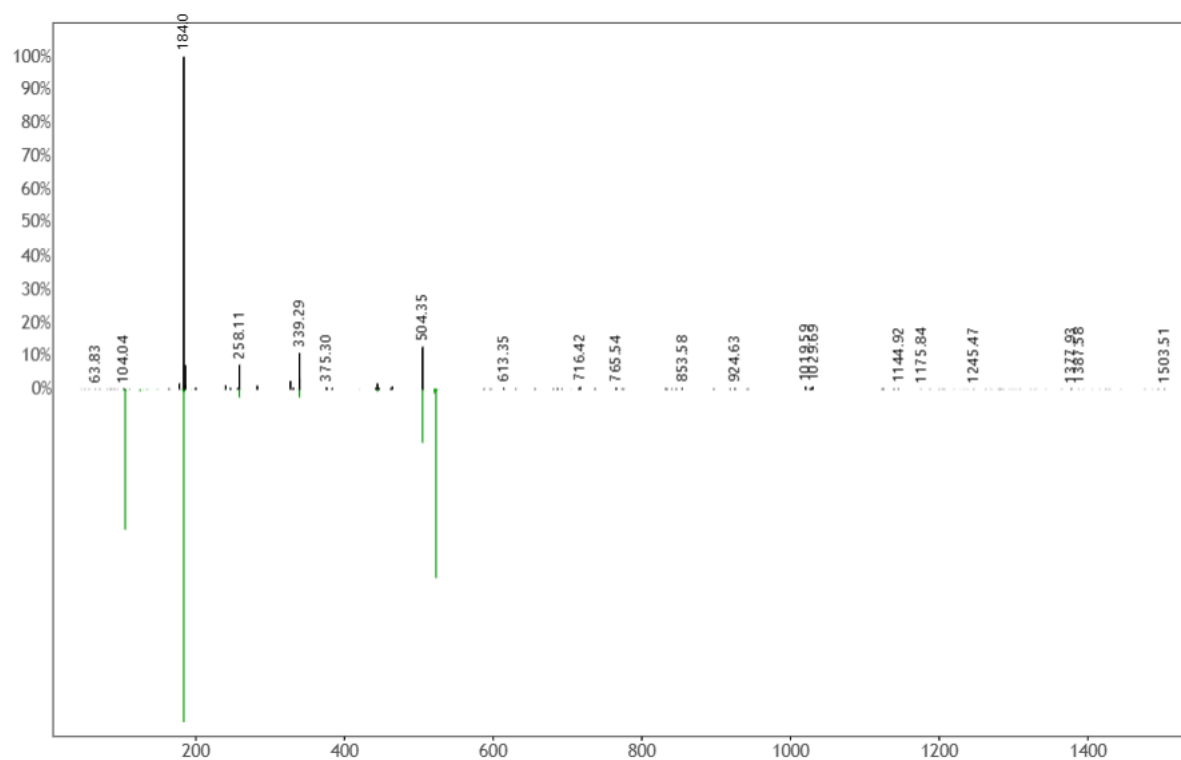

**Figure S64.** MS/MS spectrum of compound **m** (black) compared with GNPS library spectrum (green).

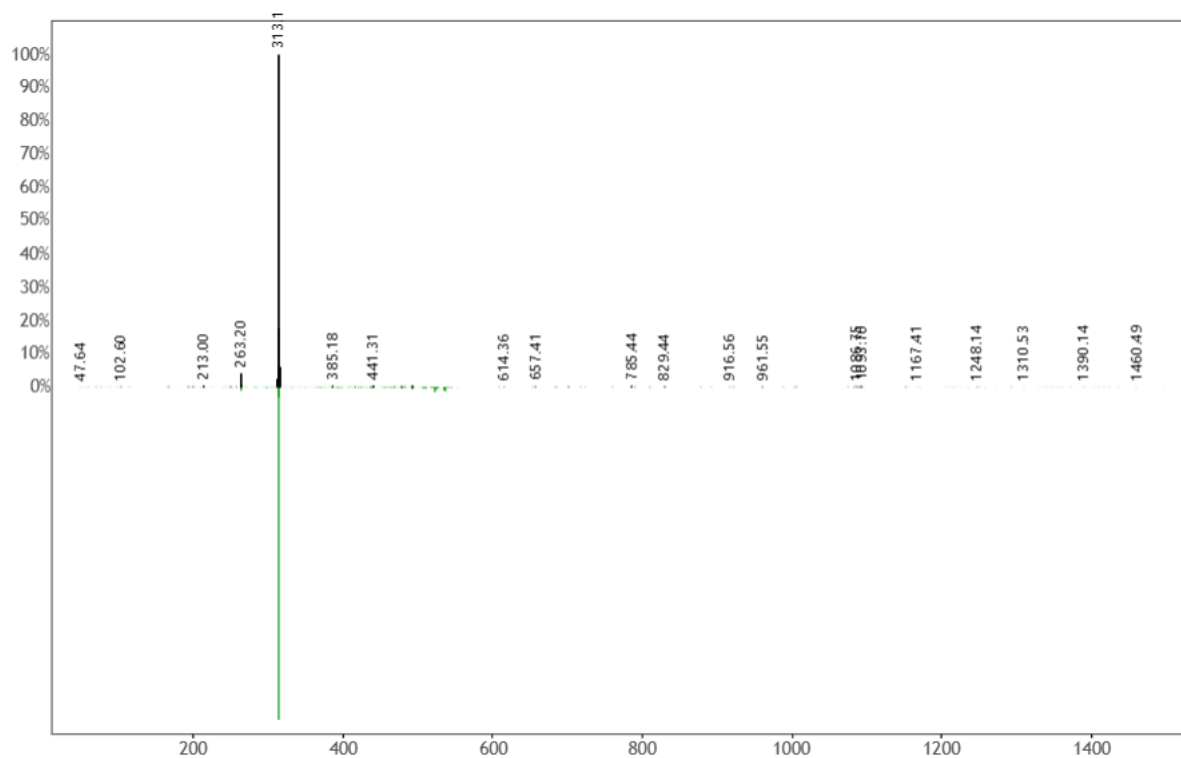

**Figure S65.** MS/MS spectrum of compound **n** (black) compared with GNPS library spectrum (green).

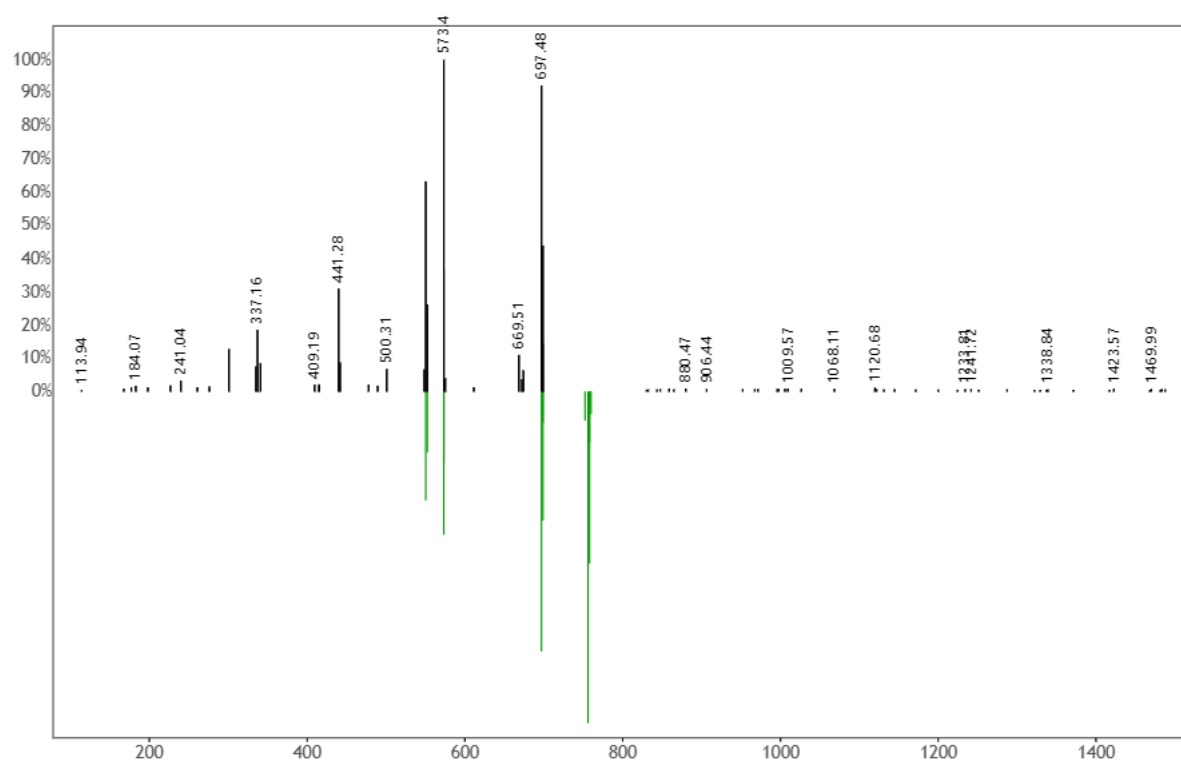

**Figure S66.** MS/MS spectrum of compound **o** (black) compared with GNPS library spectrum (green).

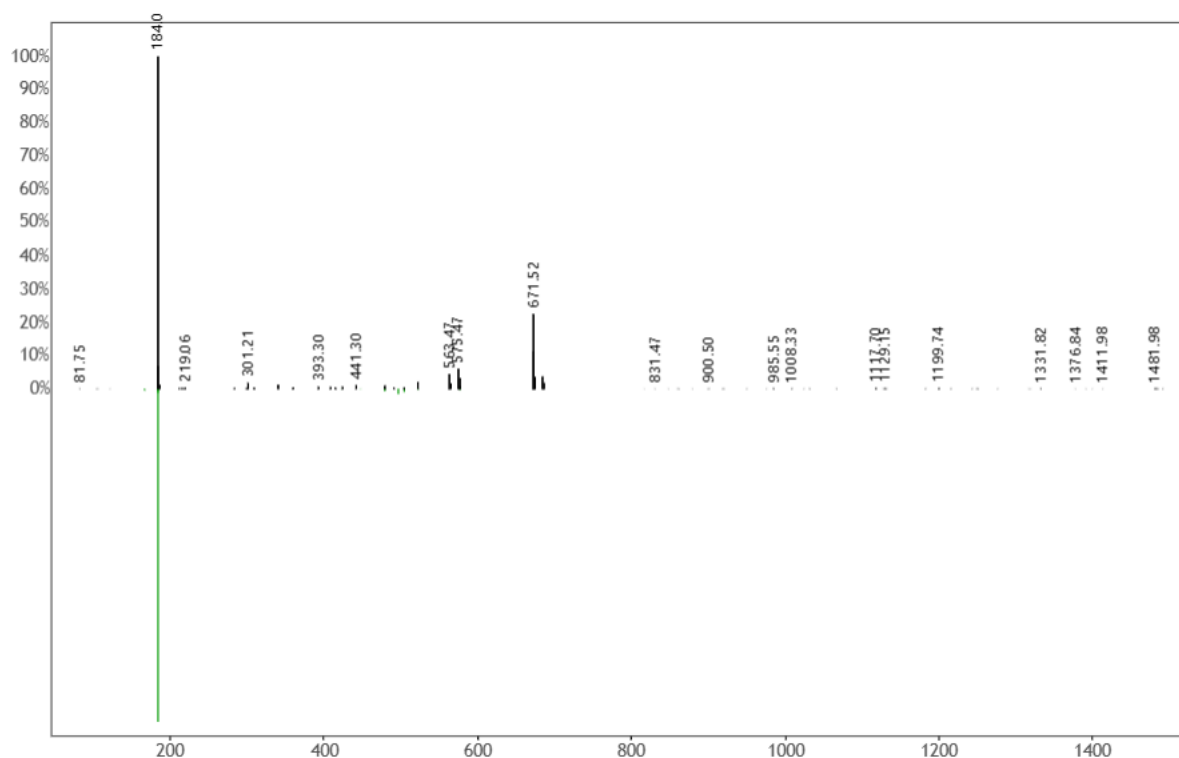

**Figure S67.** MS/MS spectrum of compound **p** (black,  $[M+H]^+$ ) compared with GNPS library spectrum (green).

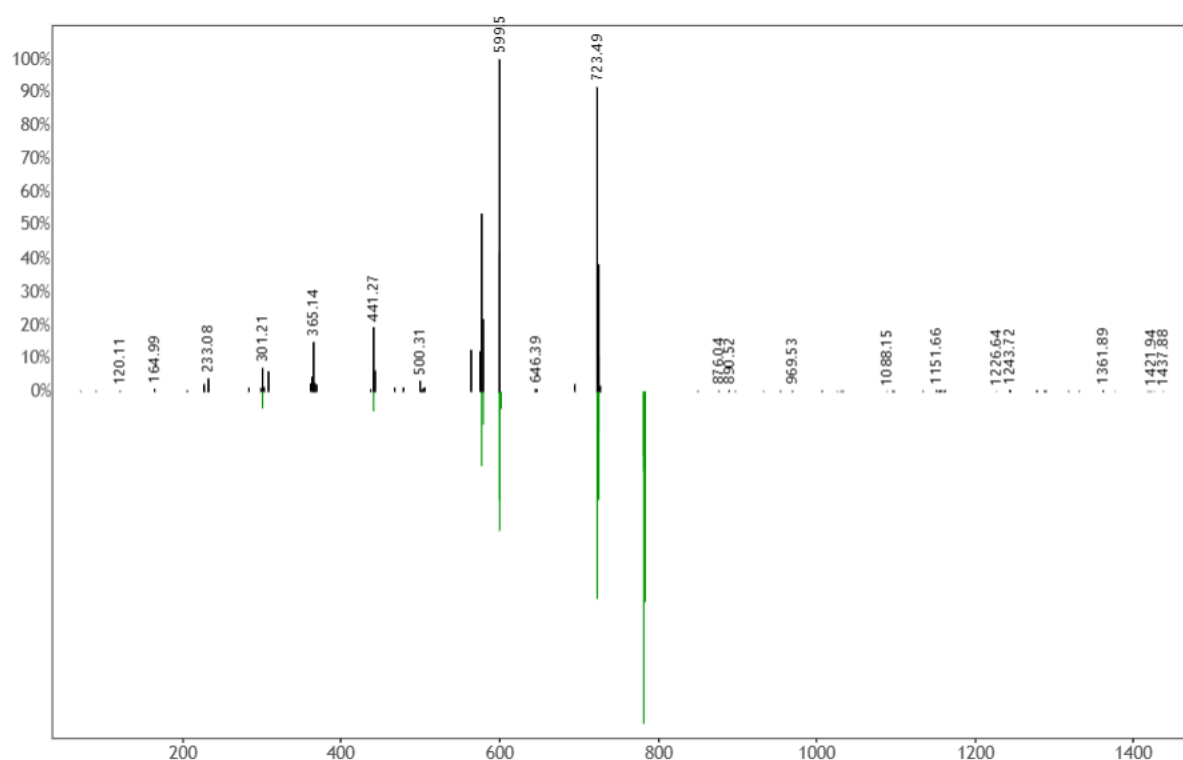

**Figure S68.** MS/MS spectrum of compound **p** (black,  $[M+Na]^+$ ) compared with GNPS library spectrum (green).

**Table S1.** NMR spectroscopic data (400/100 MHz) of daidzein (**2**) in DMSO-*d*<sub>6</sub>.

| Position | $\delta_C$ | $\delta_H$ (J in Hz) |
|----------|------------|----------------------|
| 2        | 152.4, CH  | 8.20, s              |
| 3        | 123.3, C   |                      |
| 4        | 174.6, C   |                      |
| 5        | 127.0, CH  | 7.87, d (8.8)        |
| 6        | 115.0, CH  | 6.82, dd (8.8, 2.2)  |
| 7        | 158.9, C   |                      |
| 8        | 102.0, CH  | 6.69, d (2.2)        |
| 9        | 158.0, C   |                      |
| 10       | 116.5, C   |                      |
| 1'       | 122.9, C   |                      |
| 2'       | 130.1, CH  | 7.36, d (8.6)        |
| 3'       | 115.0, CH  | 6.79, d (8.6)        |
| 4'       | 157.0, C   |                      |
| 5'       | 115.0, CH  | 6.79, d (8.6)        |
| 6'       | 130.1, CH  | 7.36, d (8.6)        |

**Table S2.** <sup>1</sup>H NMR spectroscopic data (400 MHz) of compounds **3–8** in CDCl<sub>3</sub>.

| No.  | 3                             | 4                                                   | 5 <sup>a</sup>                                             | 6                                      | 7                                                   | 8 <sup>a</sup>                                             |
|------|-------------------------------|-----------------------------------------------------|------------------------------------------------------------|----------------------------------------|-----------------------------------------------------|------------------------------------------------------------|
| 3    | 3.76–3.70, m;<br>3.55–3.46, m | 3.67, dt (12.0, 4.1);<br>3.49, ddd (12.0, 8.7, 2.8) | 3.67, dd (13.1, 5.1);<br>3.28–3.26, m                      | 3.67–3.61, m;<br>3.61–3.42, m          | 3.56, dt (12.1, 8.4);<br>3.33, ddd (12.1, 9.1, 2.9) | 3.63, dd (12.8, 4.3);<br>3.41, dd (12.8, 1.6)              |
| 4    | 2.10–1.97, m;<br>1.95–1.78, m | 1.96–1.81, m                                        | 4.24, t (4.6)                                              | 2.05–1.95, m;<br>1.95–1.79, m          | 1.77–1.57, m                                        | 4.44, t (4.3)                                              |
| 5    | 2.46–2.33, m;<br>1.95–1.78, m | 2.47–2.31, m;<br>1.96–1.81, m                       | 2.03, ddd (13.0, 5.9, 1.3);<br>1.32, ddd (13.0, 11.8, 4.6) | 2.29, td (6.4, 3.6);<br>1.95–1.79, m   | 2.19–2.04, m;<br>1.95–1.82, m                       | 2.25, ddt (13.3, 6.5, 1.6);<br>2.06, ddd (13.3, 11.2, 4.3) |
| 6    | 4.07, dd (10.1, 5.6)          | 4.07, dd (9.9, 6.4)                                 | 4.33, ddd (11.8, 5.9, 2.0)                                 | 4.05, ddd (8.7, 6.6, 1.7)              | 2.73, dd (10.6, 6.4)                                | 4.50, ddd (11.2, 6.5, 1.6)                                 |
| 8-NH |                               |                                                     |                                                            | 5.81, br s                             |                                                     |                                                            |
| 9    | 3.70–3.62, m                  | 3.77, dd (5.7, 3.9)                                 | 4.45, td (5.1, 1.8)                                        | 4.26, dd (10.7, 3.0)                   | 4.24–4.20, m                                        | 4.15, ddd (6.6, 4.4, 1.8)                                  |
| 10   | 2.24–2.16, m                  | 2.15–1.96, m                                        | 3.13, dd (5.1, 1.8)                                        | 2.78, dd (14.5, 10.7);<br>3.61–3.42, m | 3.16, dd (13.6, 5.8);<br>3.02, dd (13.6, 4.3)       | 1.95–1.80, m;<br>1.56–1.42, m                              |
| 11   | 1.03, dd (7.1, 4.0)           | 1.54, ddd (13.2, 7.4, 4.0);<br>1.31–1.12, m         |                                                            |                                        |                                                     | 1.95–1.80, m                                               |
| 12   | 0.97, dd (6.9, 4.2)           | 0.90, t (7.4)                                       |                                                            |                                        |                                                     | 0.94, d (2.4)                                              |
| 13   |                               |                                                     |                                                            |                                        |                                                     | 0.93, d (2.3)                                              |
| 4-Me |                               | 0.99, d (6.9)                                       |                                                            |                                        |                                                     |                                                            |
| 2'   |                               |                                                     | 7.27–7.18, m                                               | 7.36–7.18, m                           | 7.28–7.15, m                                        |                                                            |
| 3'   |                               |                                                     | 7.27–7.18, m                                               | 7.36–7.18, m                           | 7.28–7.15, m                                        |                                                            |
| 4'   |                               |                                                     | 7.27–7.18, m                                               | 7.36–7.18, m                           | 7.28–7.15, m                                        |                                                            |

|    |              |              |              |
|----|--------------|--------------|--------------|
| 5' | 7.27–7.18, m | 7.36–7.18, m | 7.28–7.15, m |
| 6' | 7.27–7.18, m | 7.36–7.18, m | 7.28–7.15, m |

a: NMR spectrum measured in CD<sub>3</sub>OD

**Table S3.** <sup>13</sup>C NMR spectroscopic data (100 MHz) of compounds **3–8** in CDCl<sub>3</sub>.

| No.  | 3                     | 4                     | 5 <sup>a</sup>        | 6                     | 7                     | 8 <sup>a</sup>        |
|------|-----------------------|-----------------------|-----------------------|-----------------------|-----------------------|-----------------------|
| 1    | 169.9, C              | 169.8, C              | 166.9, C              | 169.6, C              | 165.0, CH             | 168.8, C              |
| 3    | 45.7, CH <sub>2</sub> | 45.7, CH <sub>2</sub> | 55.0, CH <sub>2</sub> | 45.5, CH <sub>2</sub> | 45.1, CH <sub>2</sub> | 54.3, CH <sub>2</sub> |
| 4    | 22.0, CH <sub>2</sub> | 39.8, CH              | 68.3, CH              | 22.6, CH <sub>2</sub> | 21.7, CH <sub>2</sub> | 68.9, CH              |
| 5    | 29.5, CH <sub>2</sub> | 29.5, CH <sub>2</sub> | 37.8, CH <sub>2</sub> | 28.4, CH <sub>2</sub> | 29.0, CH <sub>2</sub> | 37.9, CH <sub>2</sub> |
| 6    | 58.4, CH              | 58.5, CH              | 58.1, CH              | 59.2, CH              | 57.8, CH              | 58.5, CH              |
| 7    | 165.5, C              | 165.5, C              | 171.0, C              | 165.2, C              | 169.8, C              | 172.9, C              |
| 9    | 63.5, CH              | 62.9, CH              | 57.4, CH              | 56.3, CH              | 58.9, CH              | 54.9, CH              |
| 10   | 33.3, CH              | 22.1, CH <sub>2</sub> | 38.6, CH <sub>2</sub> | 36.8, CH <sub>2</sub> | 40.5, CH <sub>2</sub> | 39.1, CH <sub>2</sub> |
| 11   | 19.1, CH <sub>3</sub> | 24.6, CH <sub>2</sub> |                       |                       |                       | 25.5, CH              |
| 12   | 17.7, CH <sub>3</sub> | 11.4, CH <sub>3</sub> |                       |                       |                       | 22.0, CH <sub>3</sub> |
| 13   |                       |                       |                       |                       |                       | 23.1, CH <sub>3</sub> |
| 4-Me |                       | 15.4, CH <sub>3</sub> |                       |                       |                       |                       |
| 1'   |                       |                       | 137.2, C              | 136.1, C              | 135.4, C              |                       |
| 2'   |                       |                       | 130.8, CH             | 129.33, CH            | 130.1, CH             |                       |
| 3'   |                       |                       | 129.3, CH             | 129.27, CH            | 128.7, CH             |                       |
| 4'   |                       |                       | 127.9, CH             | 127.62, CH            | 127.6, CH             |                       |
| 5'   |                       |                       | 129.3, CH             | 129.27, CH            | 128.7, CH             |                       |
| 6'   |                       |                       | 130.8, CH             | 129.33, CH            | 130.1, CH             |                       |

a: NMR spectrum measured in CD<sub>3</sub>OD**Table S4.** Specific OR of cyclic dipeptides **3–8** in MeOH.

| Compounds | Natural $[\alpha]_D^{20}$ (0.033, MeOH) | Literature                                 |
|-----------|-----------------------------------------|--------------------------------------------|
| 3         | +147.15°                                | $[\alpha]_D^{25}$ +193° (0.3, MeOH) [30]   |
| 4         | +141.14°                                | $[\alpha]_D^{20}$ +128° (0.1, EtOH) [31]   |
| 5         | −174.17°                                | $[\alpha]_D^{20}$ −48.1° (0.1, MeOH) [32]  |
| 6         | −168.17°                                | $[\alpha]_D^{25}$ −60.6° (0.66, EtOH) [33] |
| 7         | +114.11°                                | $[\alpha]_D^{20}$ +67.0° (MeOH) [34]       |
| 8         | −282.28°                                | $[\alpha]_D$ −77.8° (0.38, MeOH) [35]      |

**Table S5.** NMR spectroscopic data (400/100 MHz) of compounds **9–12**.

| No. | 9 <sup>a</sup> $\delta_C$ | 9 $\delta_H$        | 10 <sup>a</sup> $\delta_C$ | 10 $\delta_H$       | 11 <sup>b</sup> $\delta_C$ | 11 $\delta_H$             | 12 <sup>c</sup> $\delta_C$ | 12 $\delta_H$             |
|-----|---------------------------|---------------------|----------------------------|---------------------|----------------------------|---------------------------|----------------------------|---------------------------|
| 1   |                           |                     |                            |                     | 194.7, C                   |                           | 109.7, C                   |                           |
| 2   | 151.0, C                  |                     | 151.6, C                   |                     | 128.1, C                   |                           | 151.2, C                   |                           |
| 3   |                           |                     |                            |                     | 132.7, CH                  | 8.18, d (2.8)             | 116.6, CH                  | 6.67, dd (7.1, 1.0)       |
| 4   | 163.5, C                  |                     | 164.4, C                   |                     | 131.2 C                    |                           | 135.2, CH                  | 7.30, ddd (8.3, 7.1, 1.6) |
| 5   | 127.5, CH                 | 7.87, dd (8.3, 1.6) | 100.3, CH                  | 5.44, dd (7.4, 1.9) | 121.3, CH                  | 8.21, ddd (6.6, 2.8, 1.4) | 116.9, CH                  | 6.66, dd (8.3, 1.0)       |

|      |              |                              |              |                        |                       |                        |           |                        |
|------|--------------|------------------------------|--------------|------------------------|-----------------------|------------------------|-----------|------------------------|
| 6    | 122.7,<br>CH | 7.17–7.13, m                 | 142.3,<br>CH | 7.39, dd<br>(7.4, 5.6) | 121.9,<br>CH          | 7.24–7.18, m           | 132.3, CH | 7.92, dd (8.3,<br>1.6) |
| 7    | 135.4,<br>CH | 7.62, ddd<br>(8.5, 7.3, 1.6) |              |                        | 123.0,<br>CH          | 7.24–7.18, m           | 173.6, C  |                        |
| 8    | 116.0,<br>CH | 7.17–7.13, m                 |              |                        | 111.6,<br>CH          | 7.44, dd (6.5,<br>2.3) |           |                        |
| 9    | 141.8, C     |                              |              |                        | 113.5, C              |                        |           |                        |
| 10   | 114.9, C     |                              |              |                        | 64.9, CH <sub>2</sub> | 4.72, d (2.8)          |           |                        |
| 1-NH |              |                              |              | 10.83, br s            |                       |                        |           |                        |
| 3-NH |              | 11.23, br s                  |              | 11.03, br s            |                       |                        |           |                        |

a: NMR spectrum measured in DMSO-*d*<sub>6</sub>; b: NMR spectrum measured in CD<sub>3</sub>OD; c: NMR spectrum measured in CDCl<sub>3</sub>
